# Supplementary material for: Synthesis of fused triazolo[4,5-d]quinoline/chromene/thiochromene derivatives via palladium catalysis mediated by tetrabutylammonium iodide
Source: Royal Society of Chemistry journal article supplement (doi:10.1039/c2ra22799a), 2012-12-11
Supplement: c2ra22799a.pdf [file c2ra22799a.pdf]

Electronic Supporting Information

**Efficient Synthesis of Fused Triazolo[4,5-*d*]quinoline  
Derivates via Palladium Catalysis Mediated by  
Tetrabutylammonium Iodide**

**Chung-Yu Chen,<sup>a</sup> Cheng-Hao Yang,<sup>b</sup> Wan-Ping Hu,<sup>c</sup> Jaya Kishore Vandavasi,<sup>b</sup>  
Mei-Ing Chung,<sup>a</sup> and Jeh-Jeng Wang\*,<sup>b</sup>**

*a School of Pharmacy, Kaohsiung Medical University, Kaohsiung city 807, Taiwan*

*b Department of Medicinal and Applied Chemistry, Kaohsiung Medical University, Taiwan*

*c Department of Biotechnology, Kaohsiung Medical University, Taiwan*

Fax: (+886)-7-312-5339, E-mail: [jjwang@kmu.edu.tw](mailto:jjwang@kmu.edu.tw)

**Table of contents:**

- 
1. General Information
  2. <sup>1</sup>H NMR and <sup>13</sup>C NMR spectra of compounds **2a-2l**
  3. <sup>1</sup>H NMR and <sup>13</sup>C NMR spectra of compounds **4a-4p**.
  4. ORTEP Diagram
  5. Biological result of compounds **2a** 、 **2d** 、 **2f** 、 **4a** 、 **4c** 、 **4i** 、 **4m** and **4n**.
  6. CCDC No of **2a** 、 **4a** and **4o**.

## General Experimental Procedures

The palladium-catalyzed annulation reactions were performed in mild condition under an atmosphere of nitrogen. All other reactions, unless otherwise indicated, were carried out under ambient atmosphere in single-neck, round bottom flasks fitted with a rubber septum, equipped with a magnetic stir bar. Air- or water- sensitive solvents were transferred via syringe. When required, solvents were degassed by bubbling of nitrogen through a needle. Organic solutions were concentrated by rotary evaporation at 25 – 40 °C under reduced pressure (15 – 30 torr, house vacuum). Analytical Thin Layer Chromatography (TLC) was performed using pre-coated UV 254 plates (0.2 mm) from EM Separations. Visualization was accomplished with a 254 nm UV light source, generally followed by immersion in potassium permanganate (KMnO<sub>4</sub>) or anisaldehyde solutions, with subsequent heating with a heat gun.

## Instrumentation

<sup>1</sup>H NMR and <sup>13</sup>C NMR spectra were recorded at 400 and 100 MHz, respectively, using CDCl<sub>3</sub> as a solvent. <sup>1</sup>H NMR chemical shifts are referenced to TMS or CDCl<sub>3</sub> (0; 7.26 ppm). <sup>13</sup>C NMR was referenced to CDCl<sub>3</sub> (77.0 ppm). Mass spectra and high-resolution mass spectra (HRMS) were measured using the electron-impact (EI, 70 eV) technique by Taichung Regional Instrument Center of NSC at NCHU. Elemental analyses were performed by Tainan Regional Instrument Center of NSC at NCKU. Flash chromatography was carried out on silica gel 60 (E. Merck, 230-400 mesh). Spectral data are represented in the following order: chemical shift; multiplicity (s = singlet, d = doublet, t = triplet, q = quartet, dd = doublet of doublets, td = triplet of doublets, m = multiplet); coupling constant (*J*, Hz); number of protons.

## Materials

Unless otherwise noted, all reagents, and catalysts were purchased from commercial sources (Sigma-Aldrich, Alfa Aesar, TCI) and used as received. Tetrahydrofuran and *N,N*-dimethyl formamide were purified by distillation under nitrogen immediately prior to use. All other solvents were used as supplied without further purification.

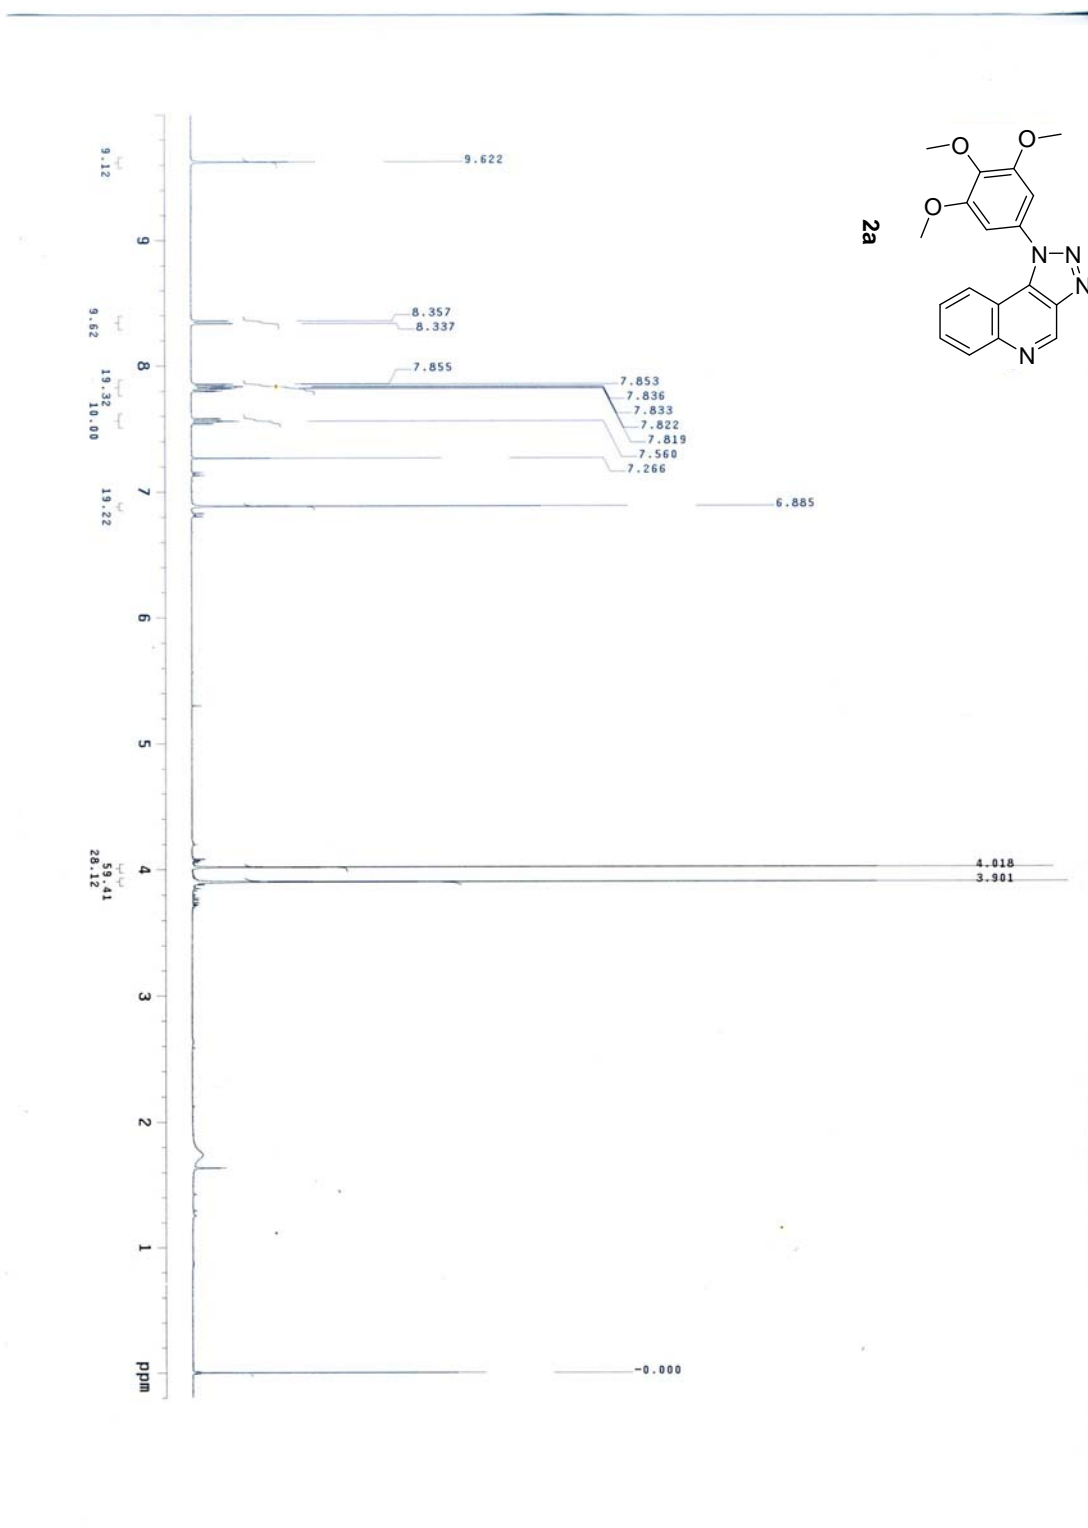

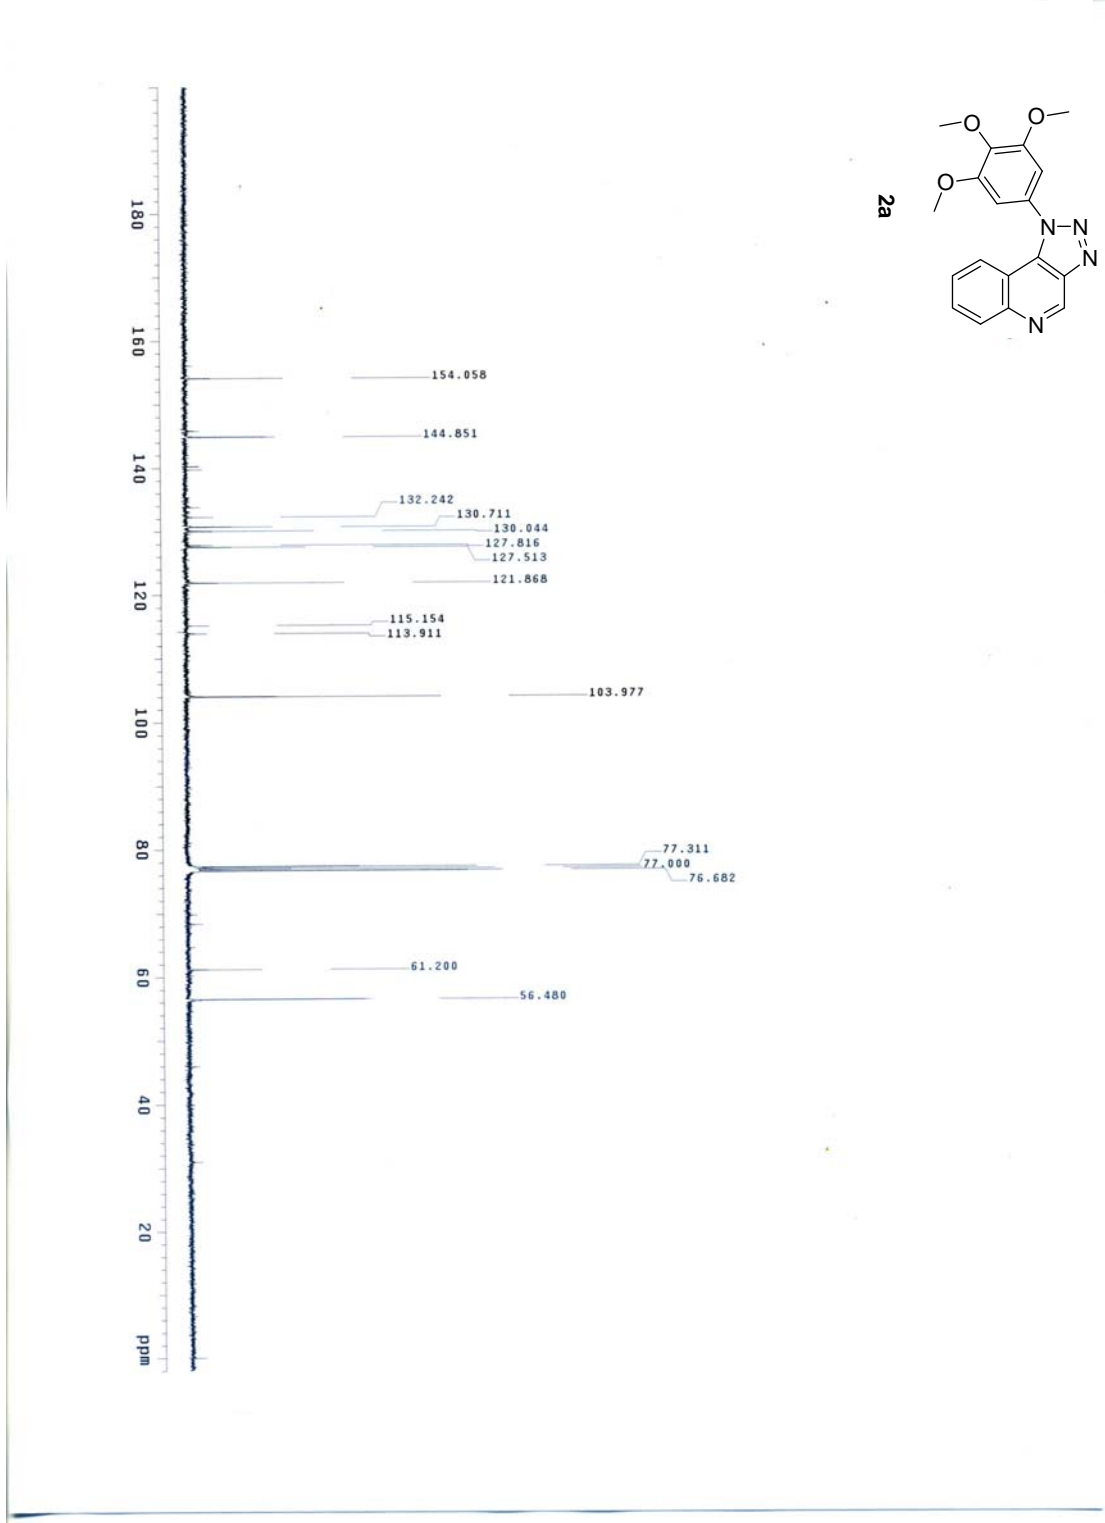

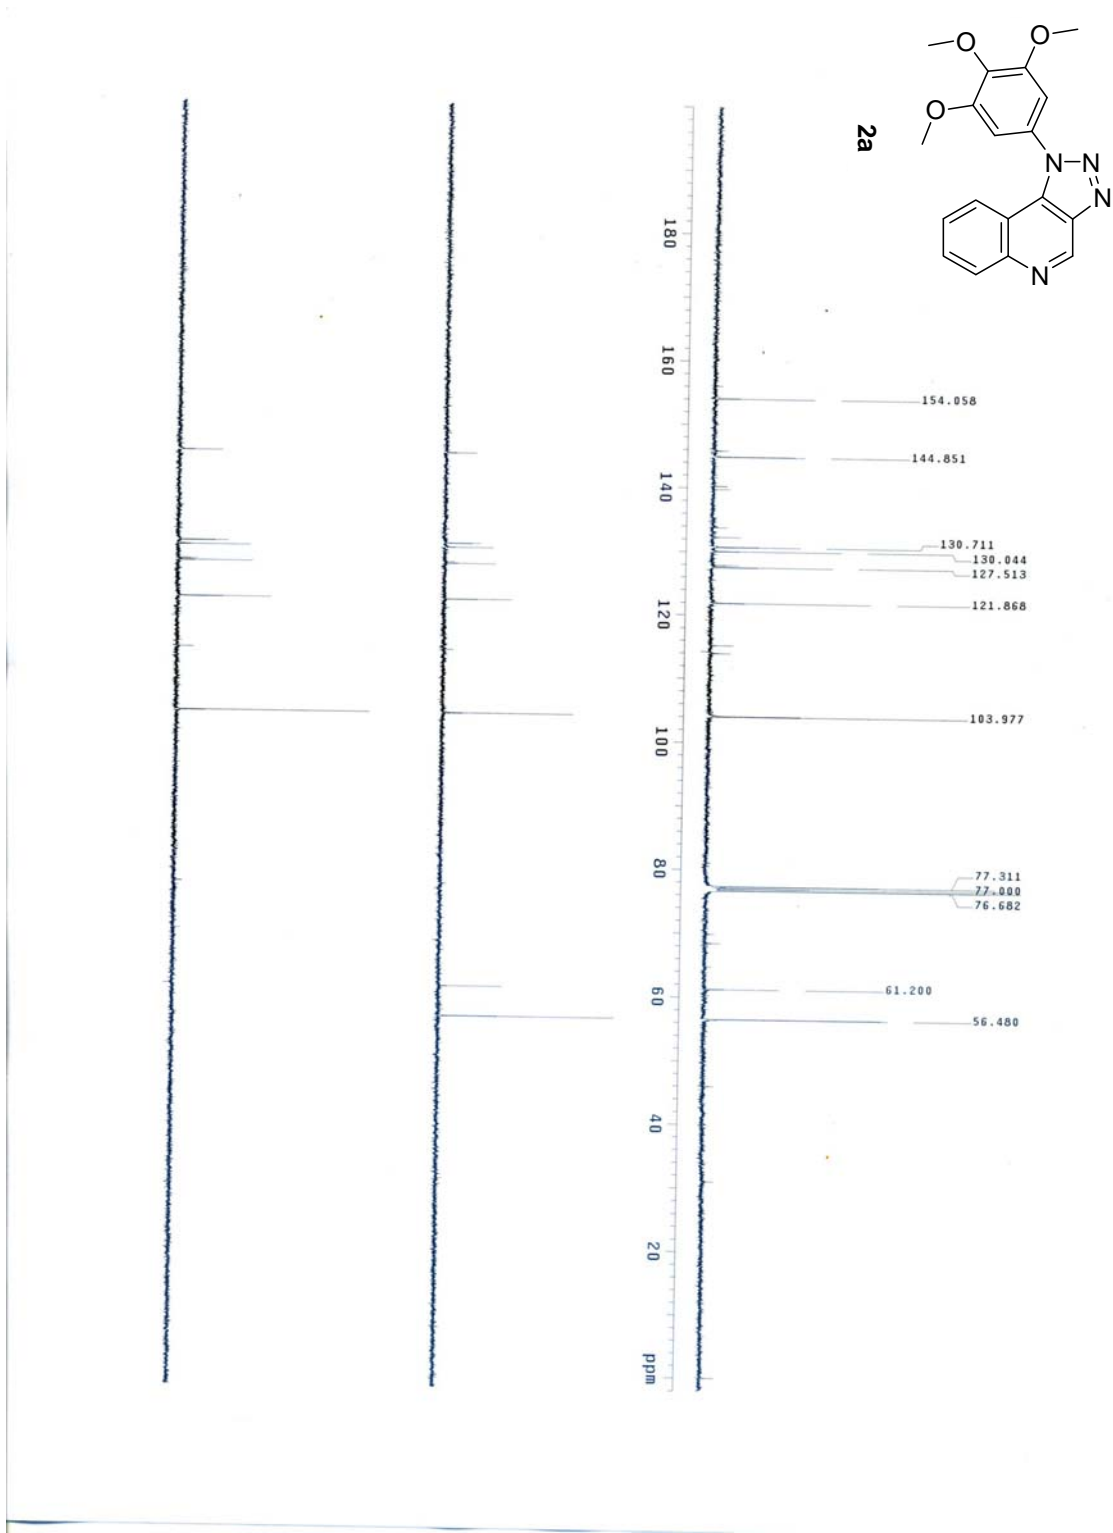

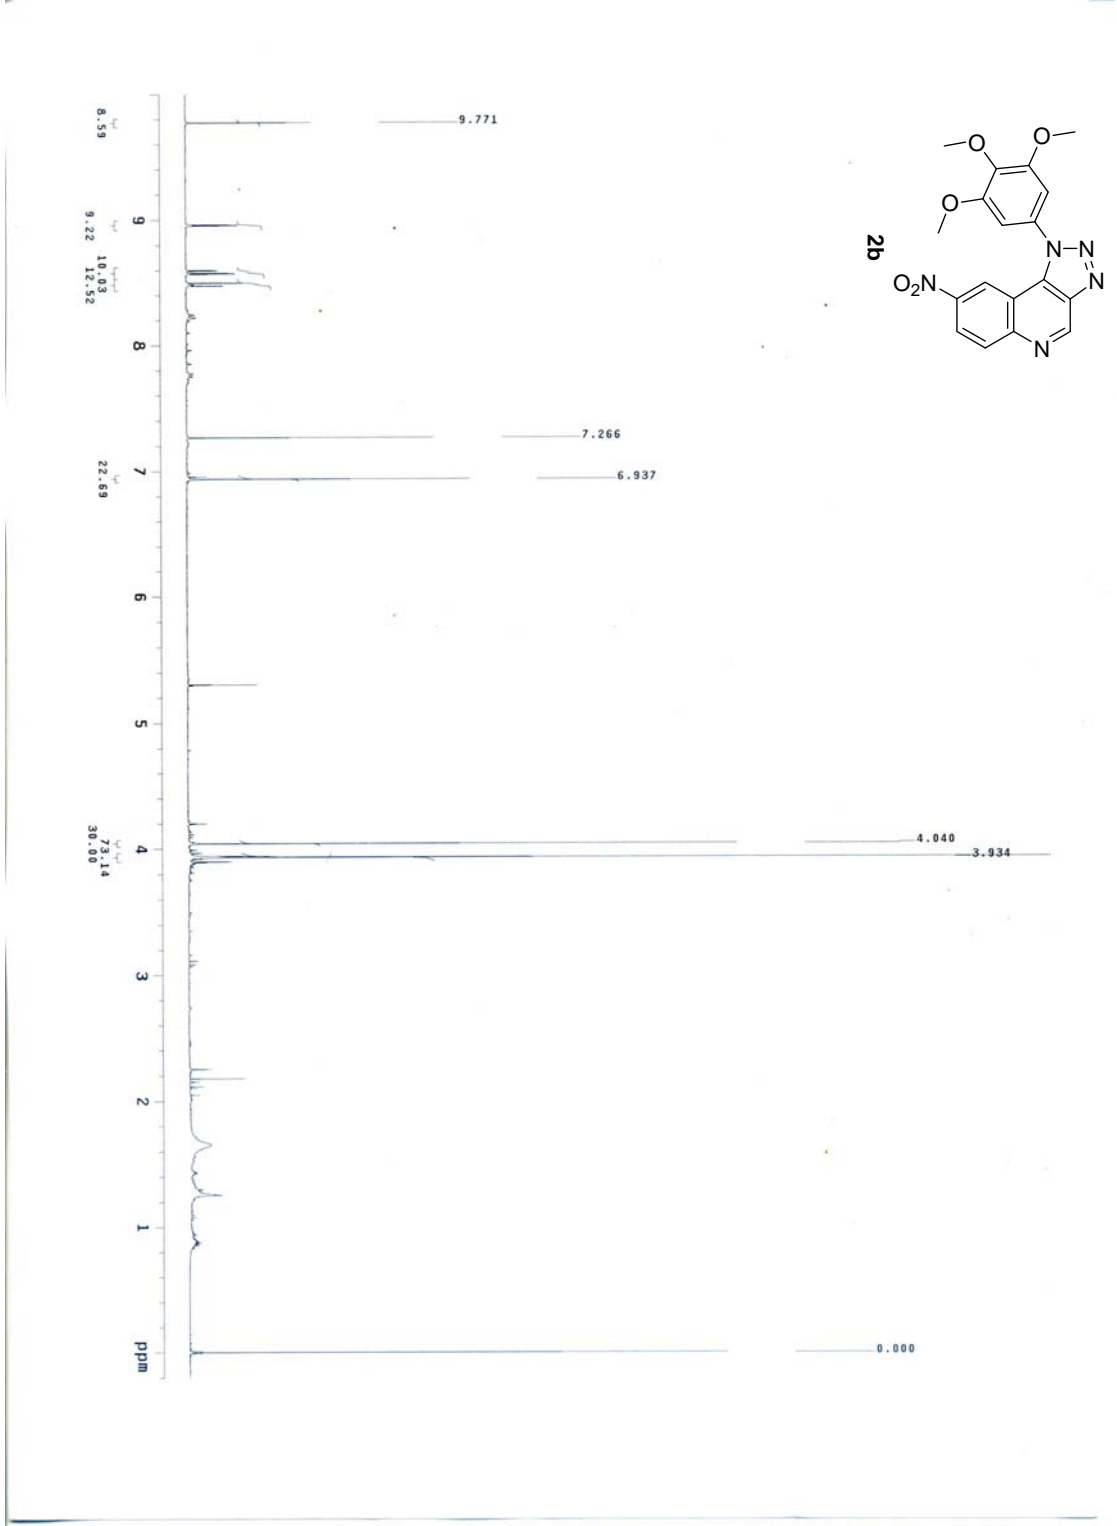

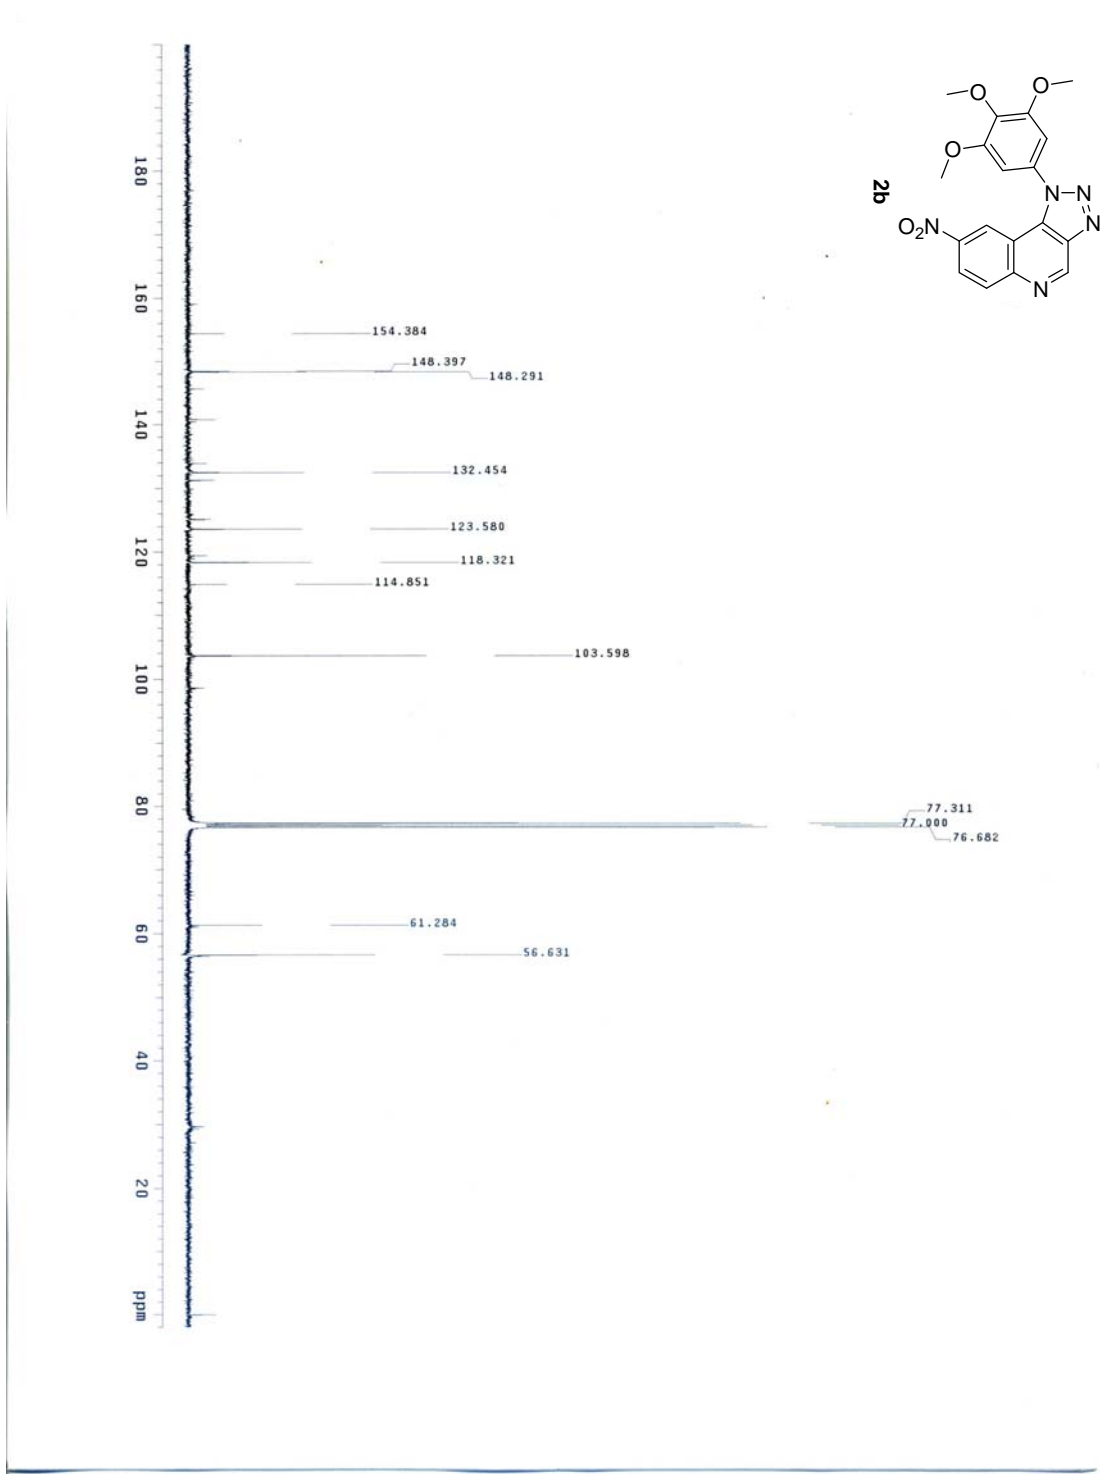

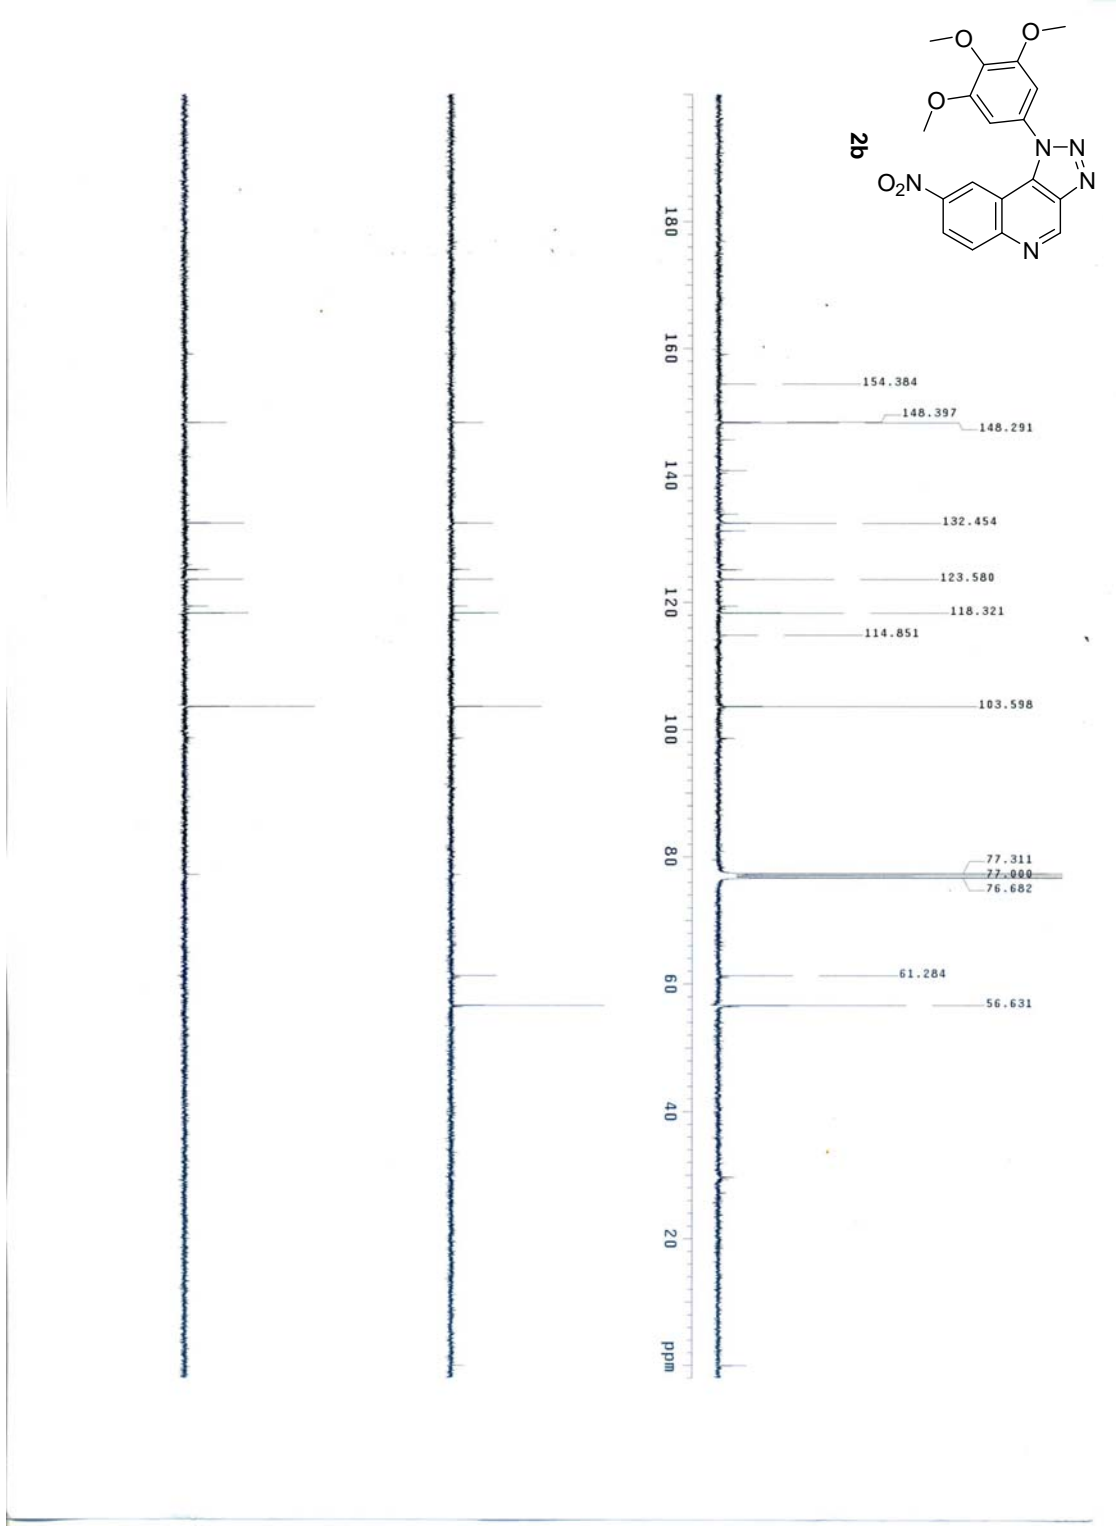

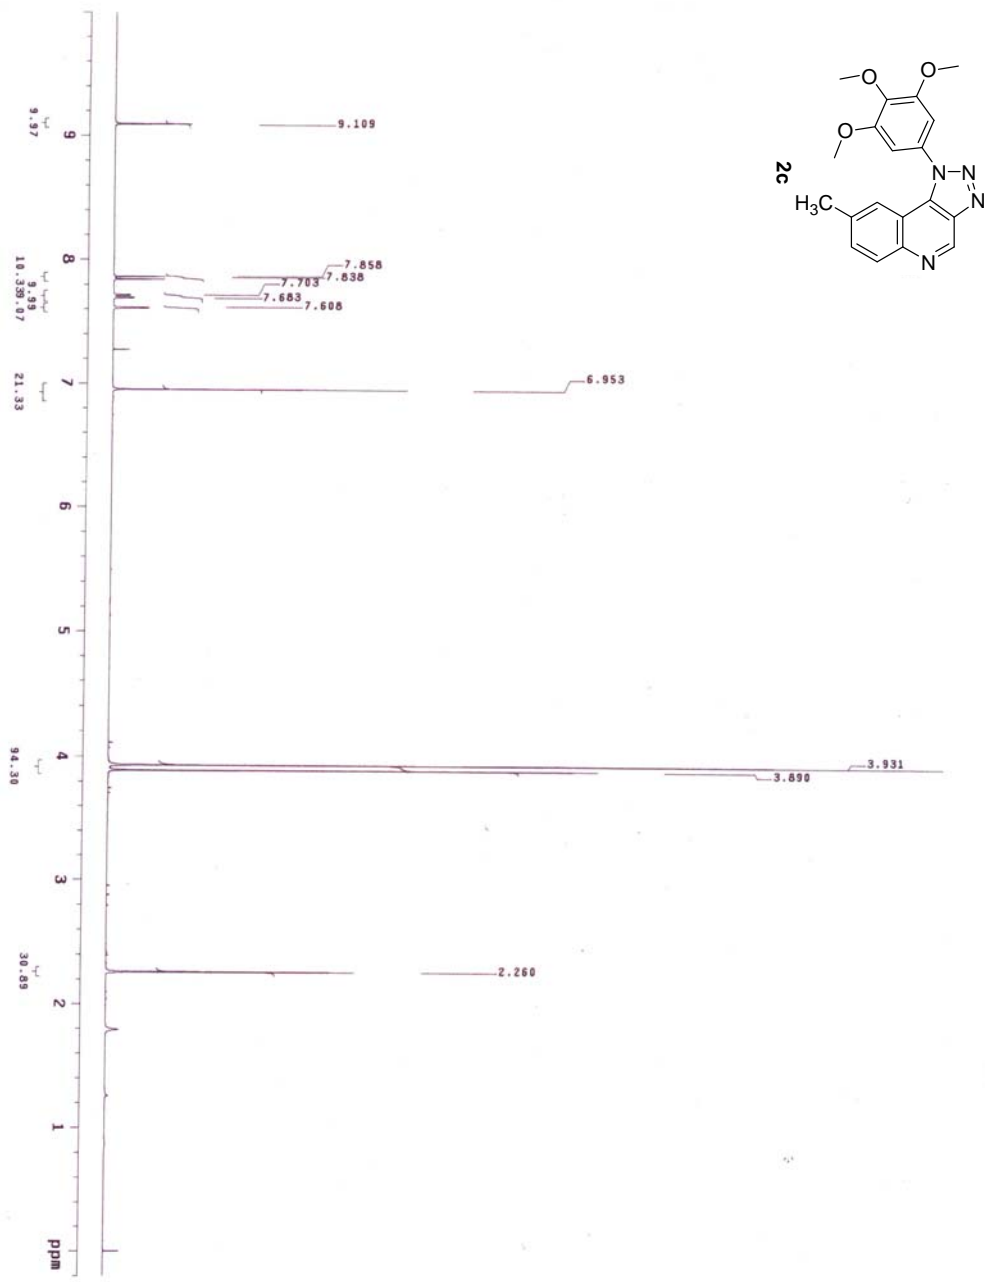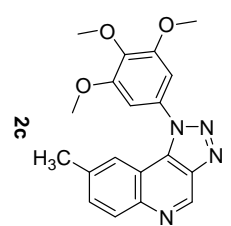

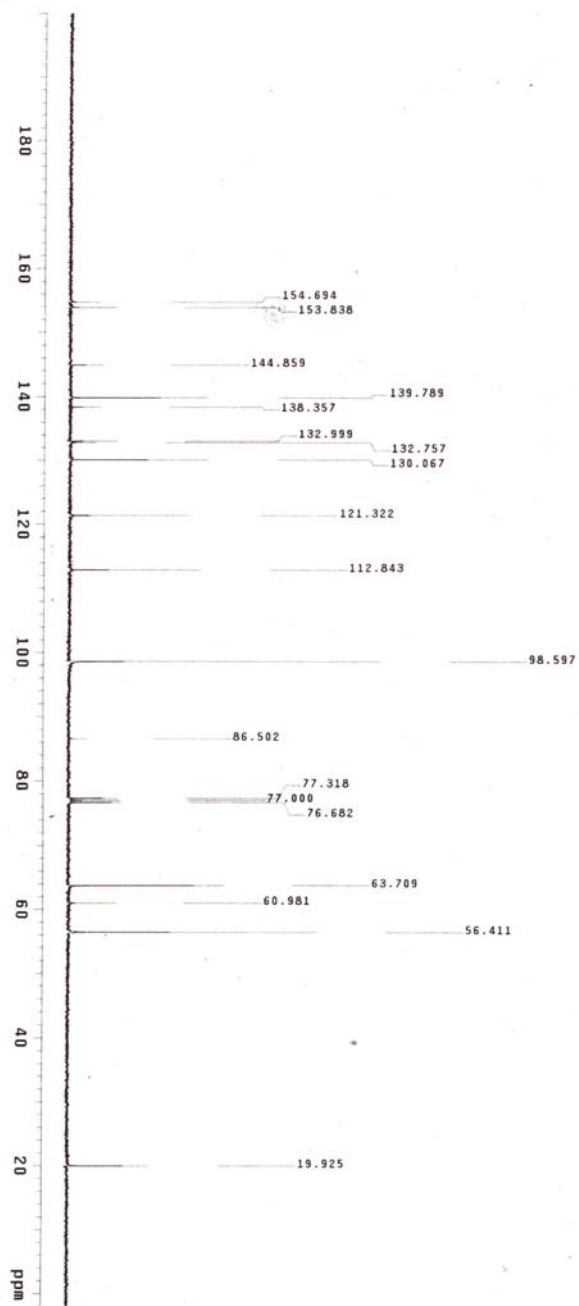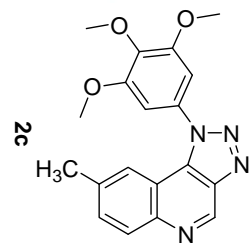

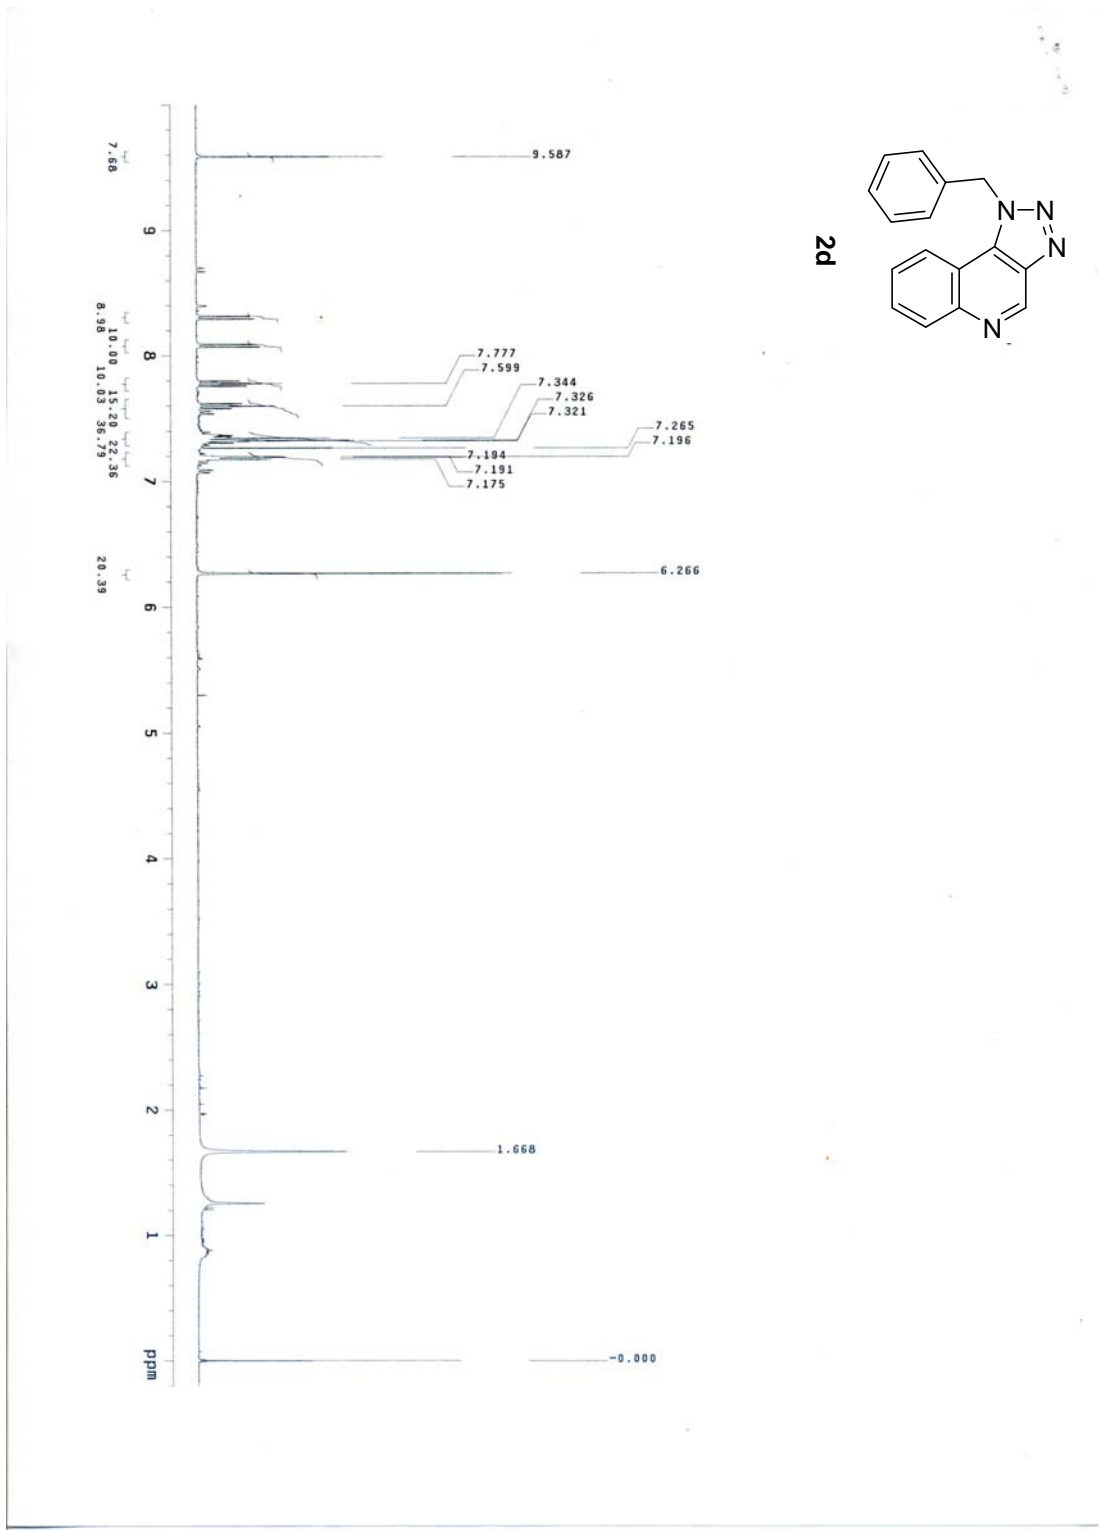

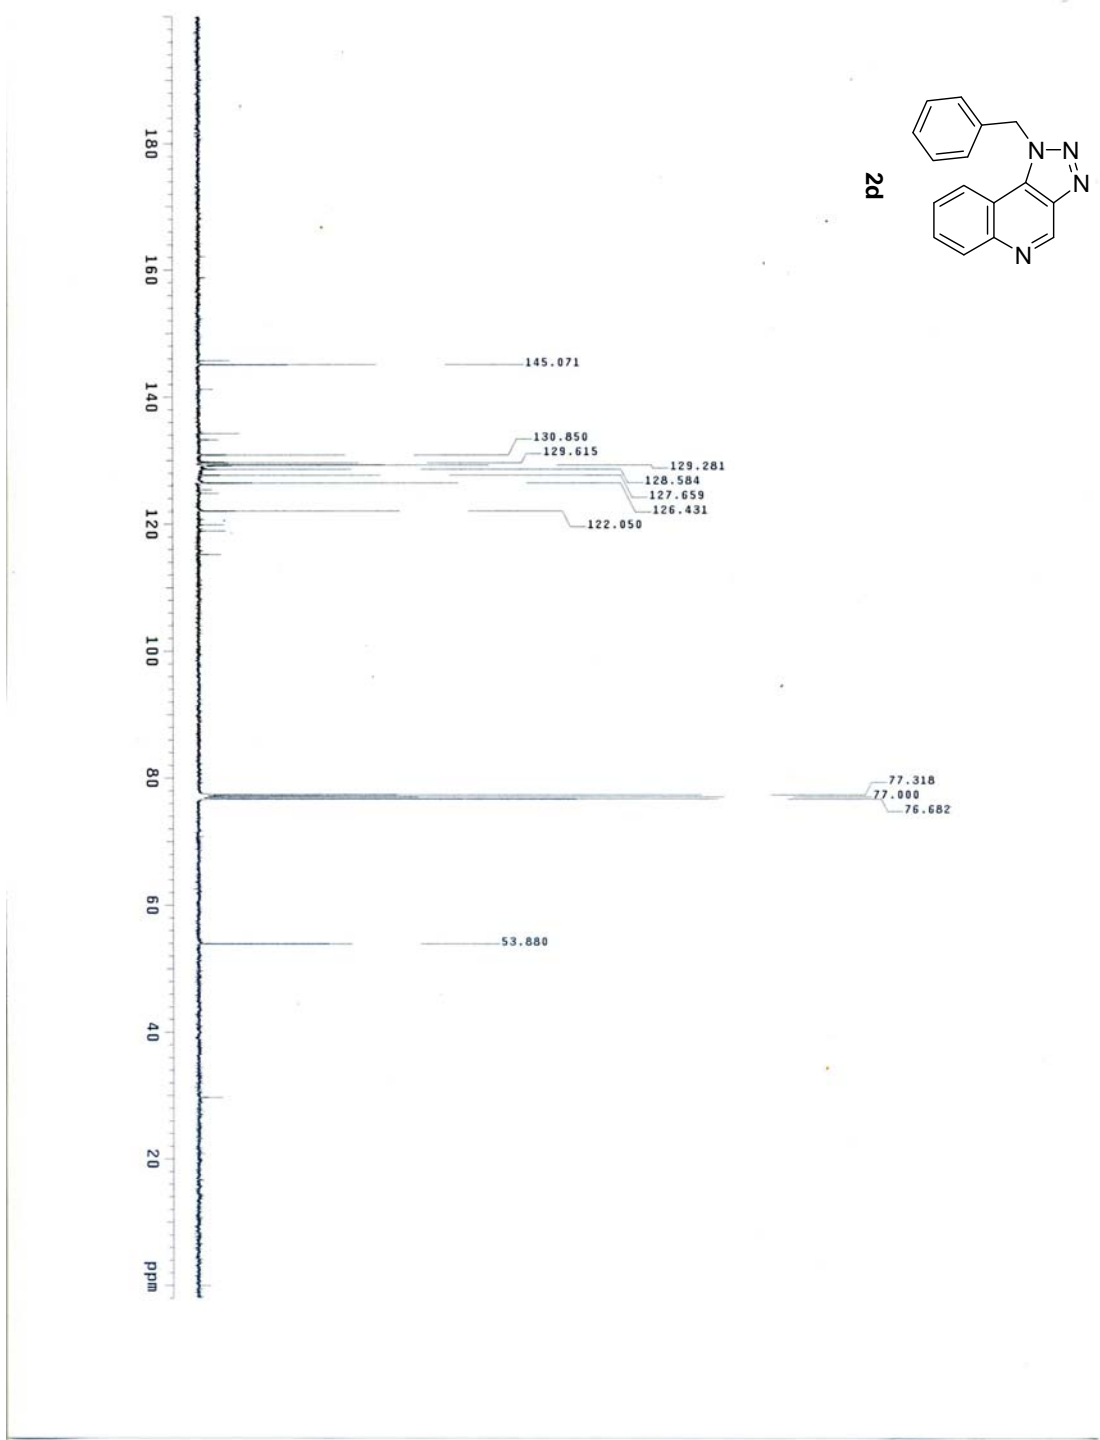

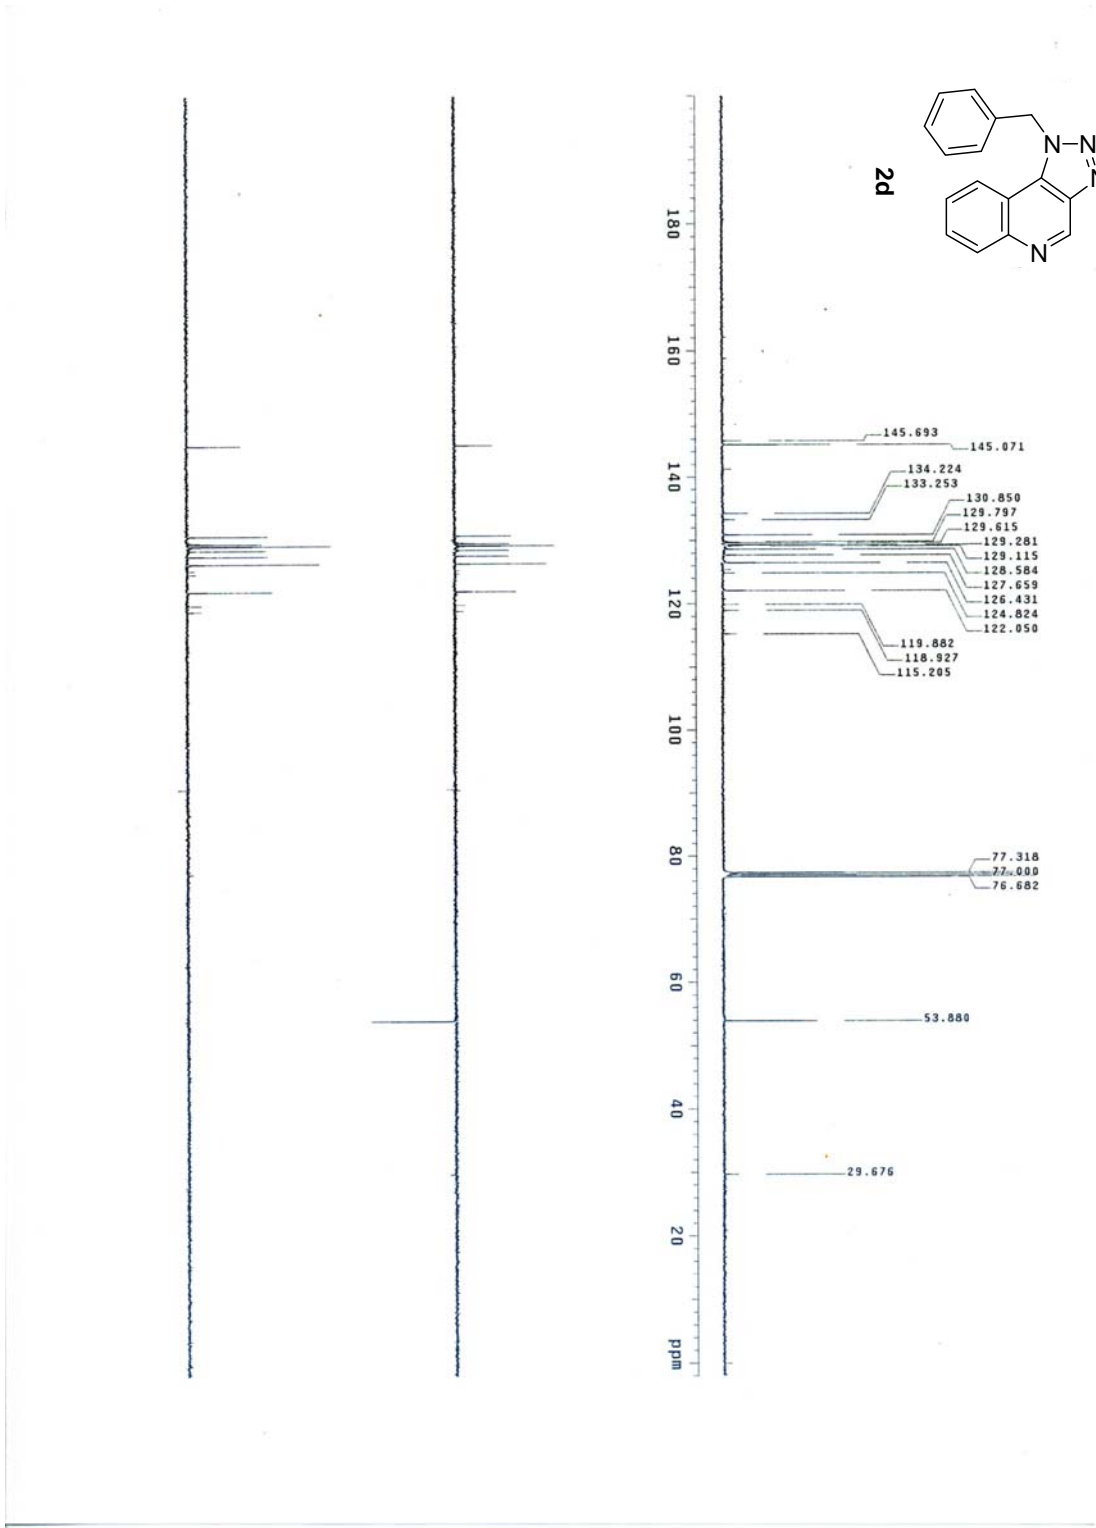

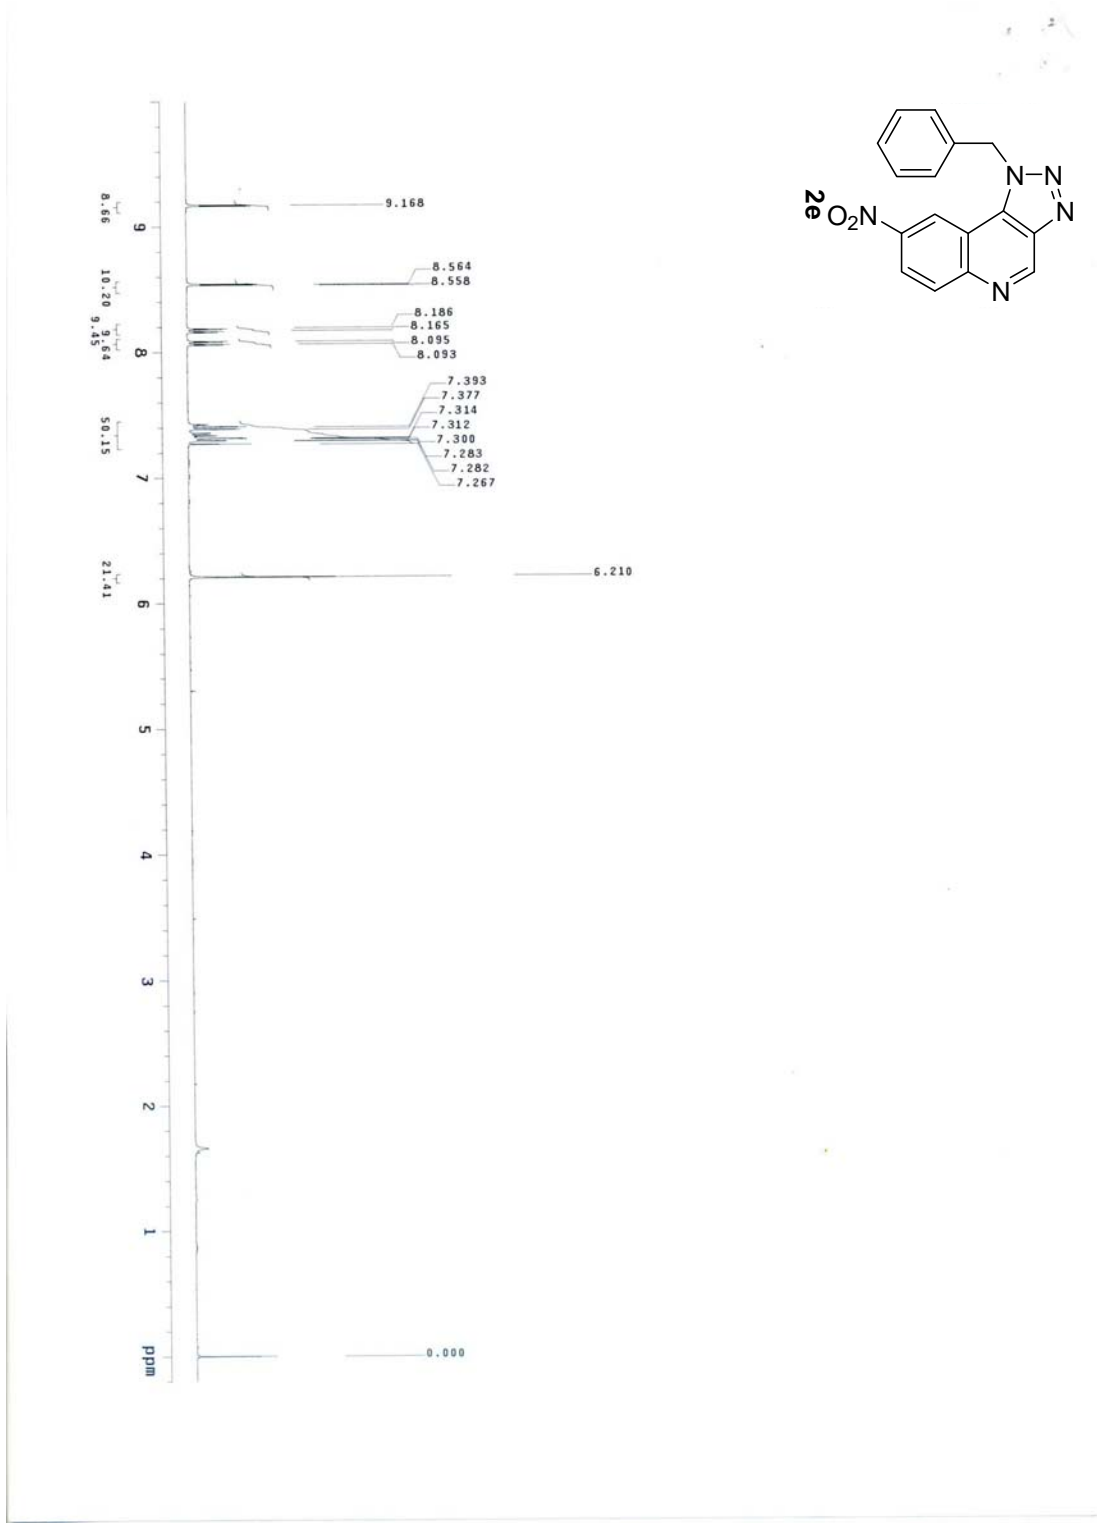

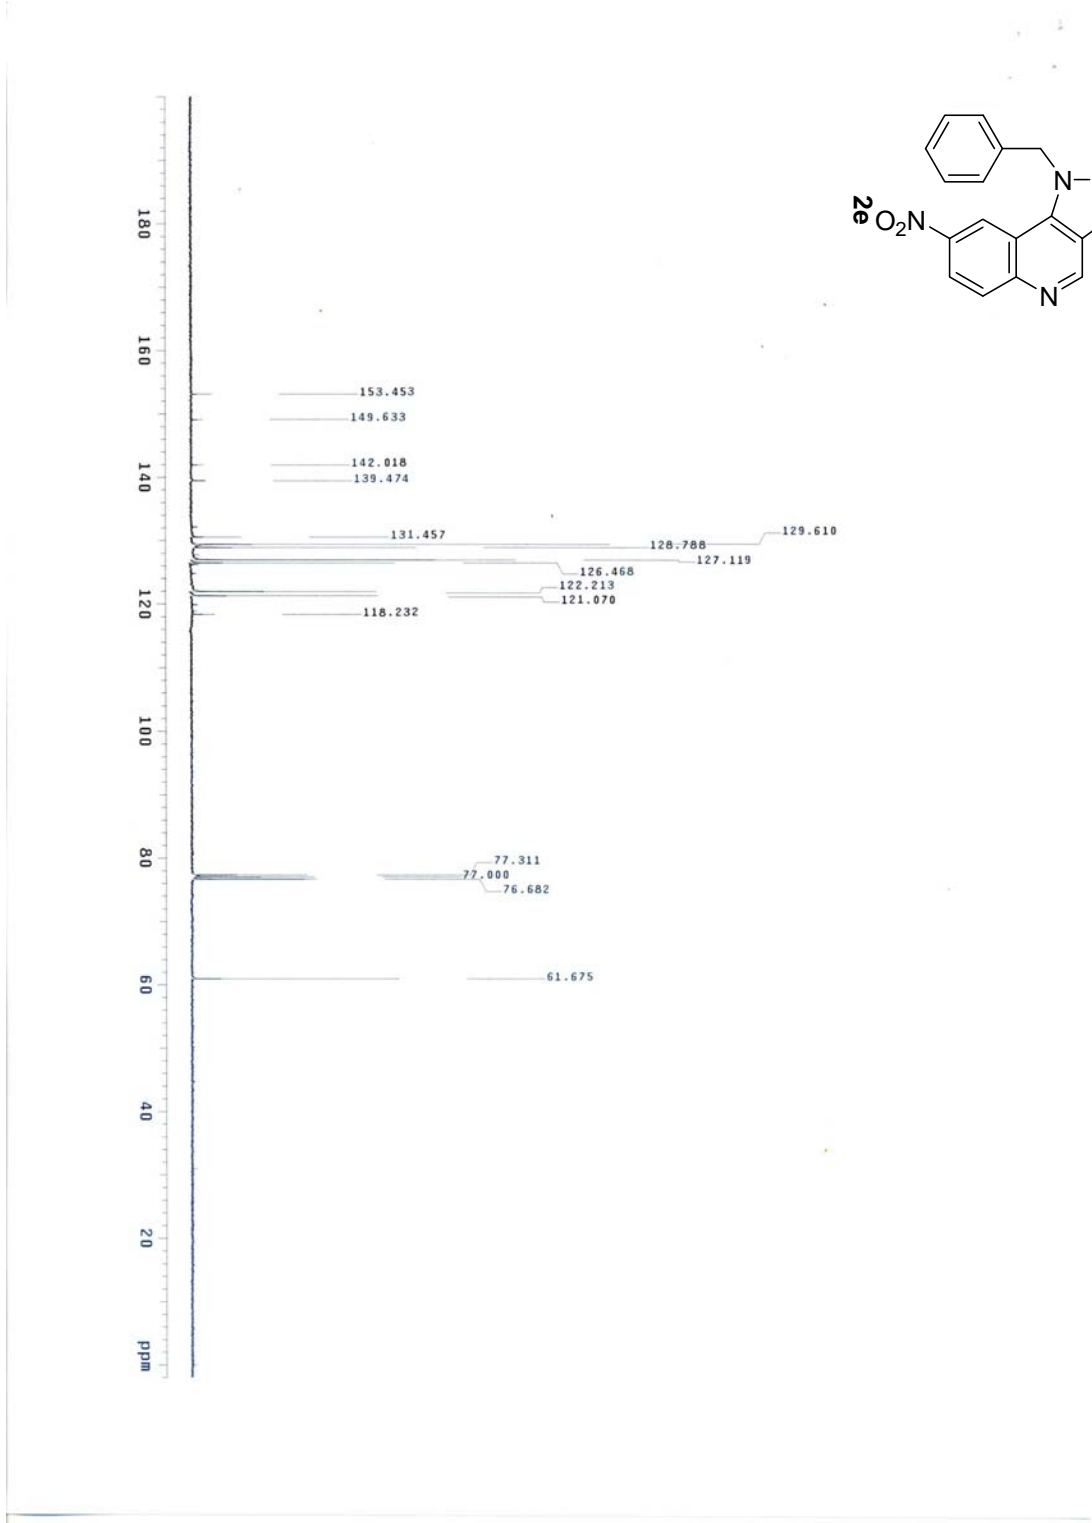

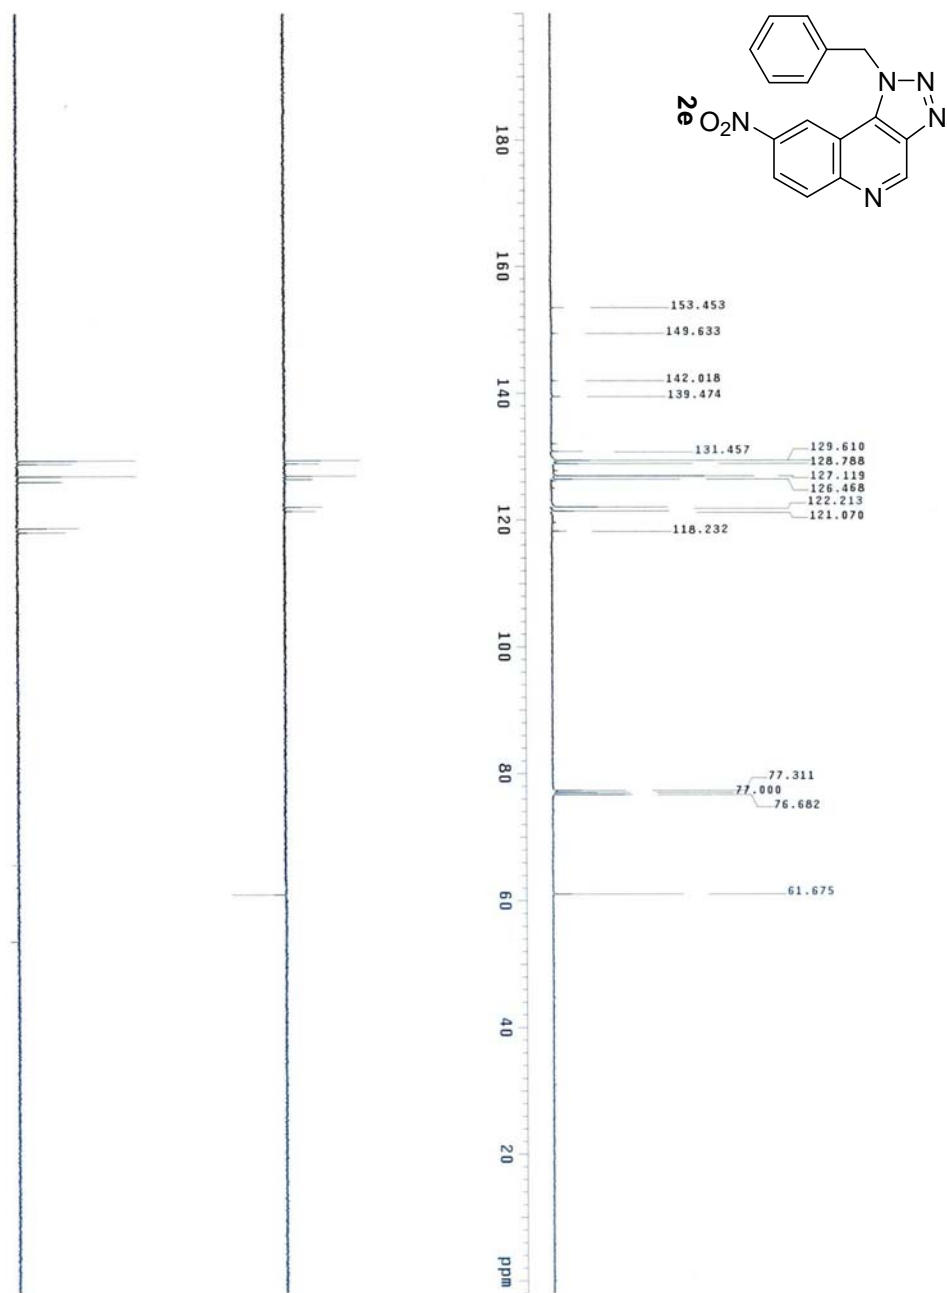

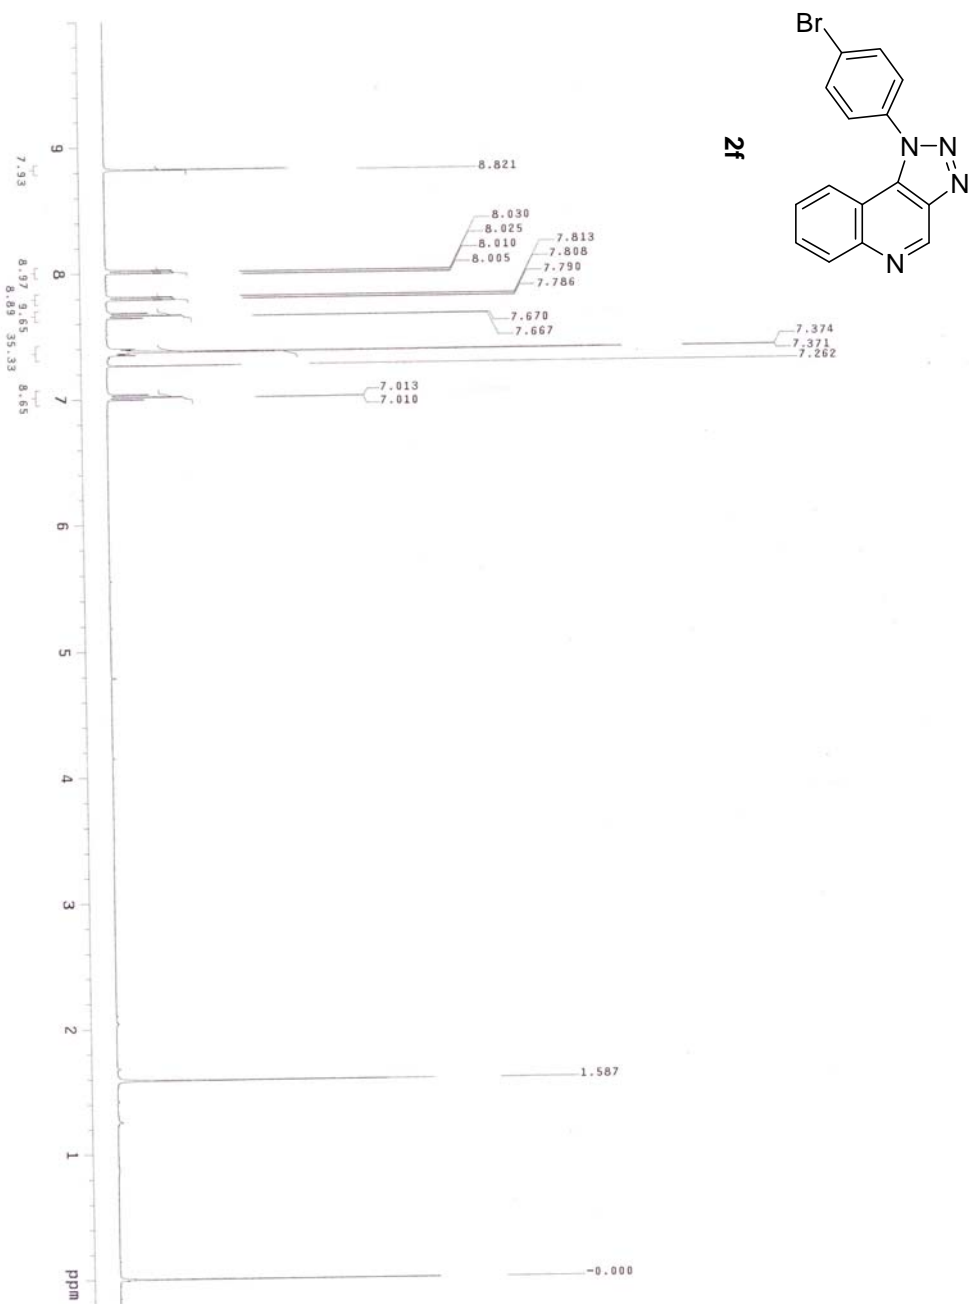

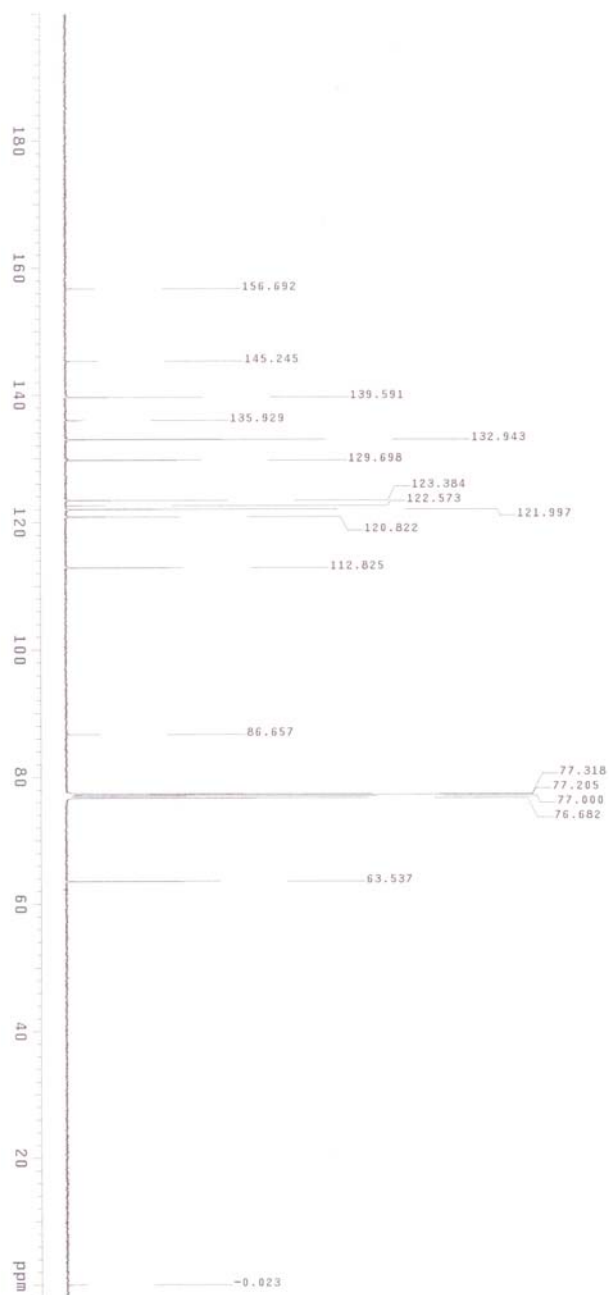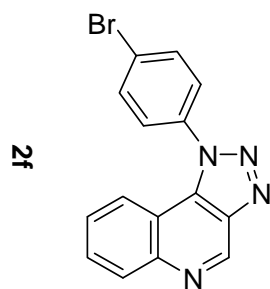

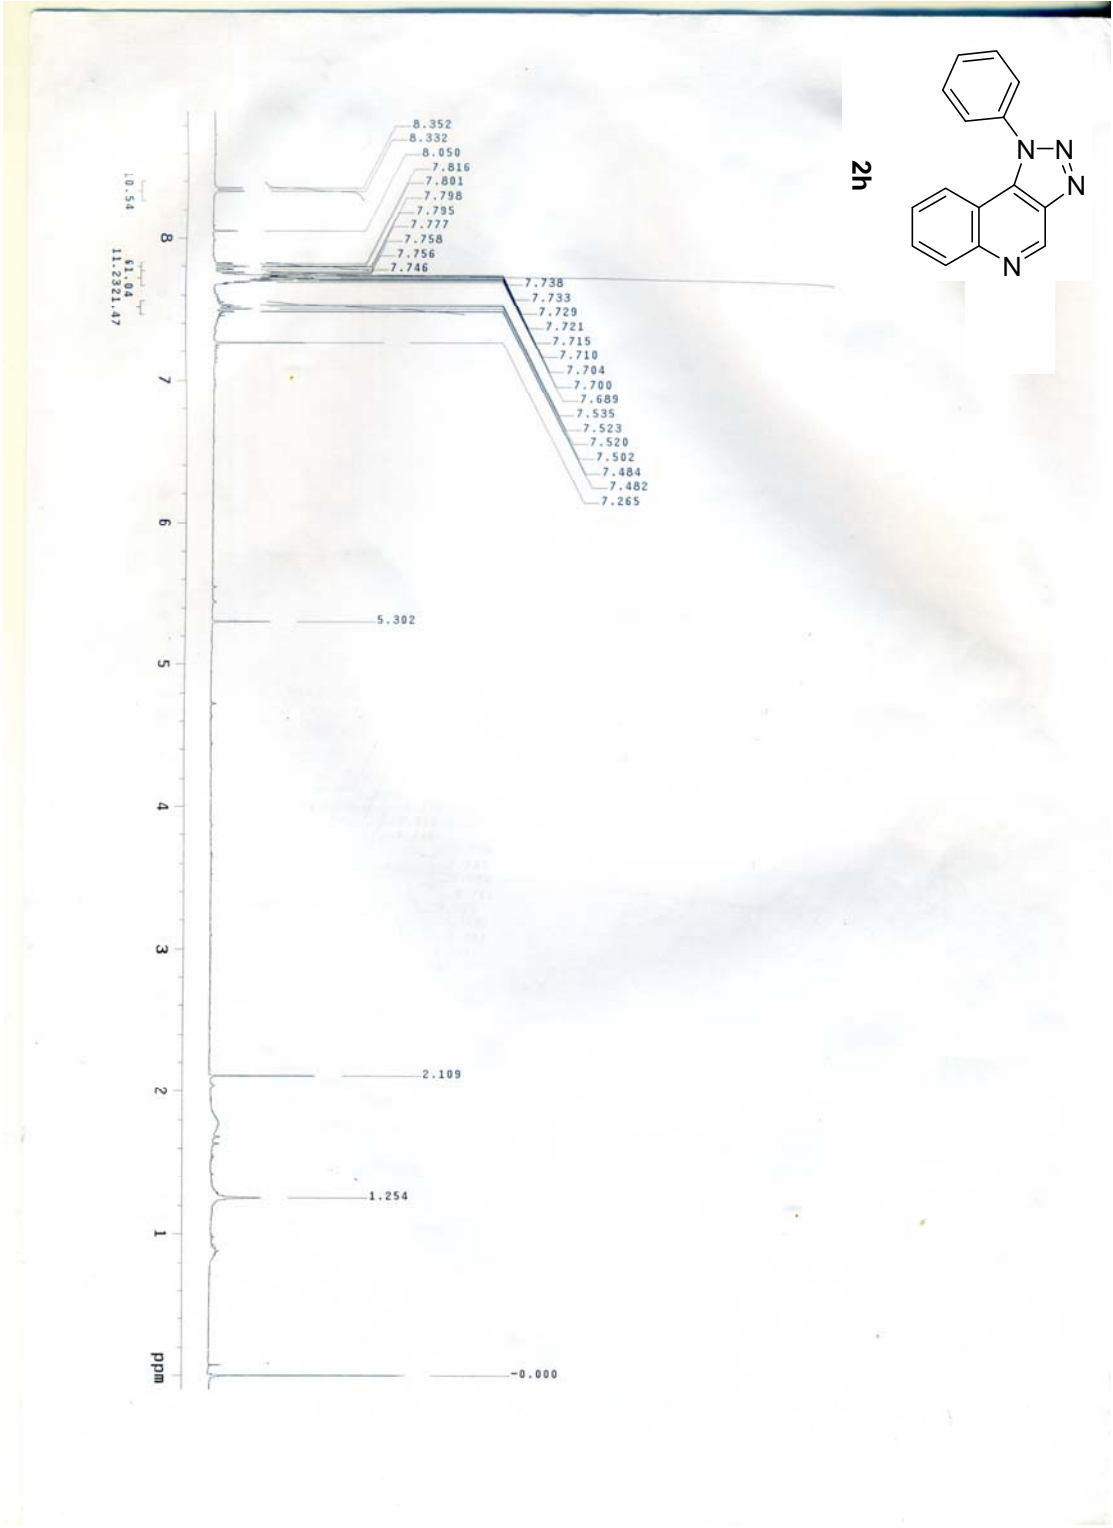

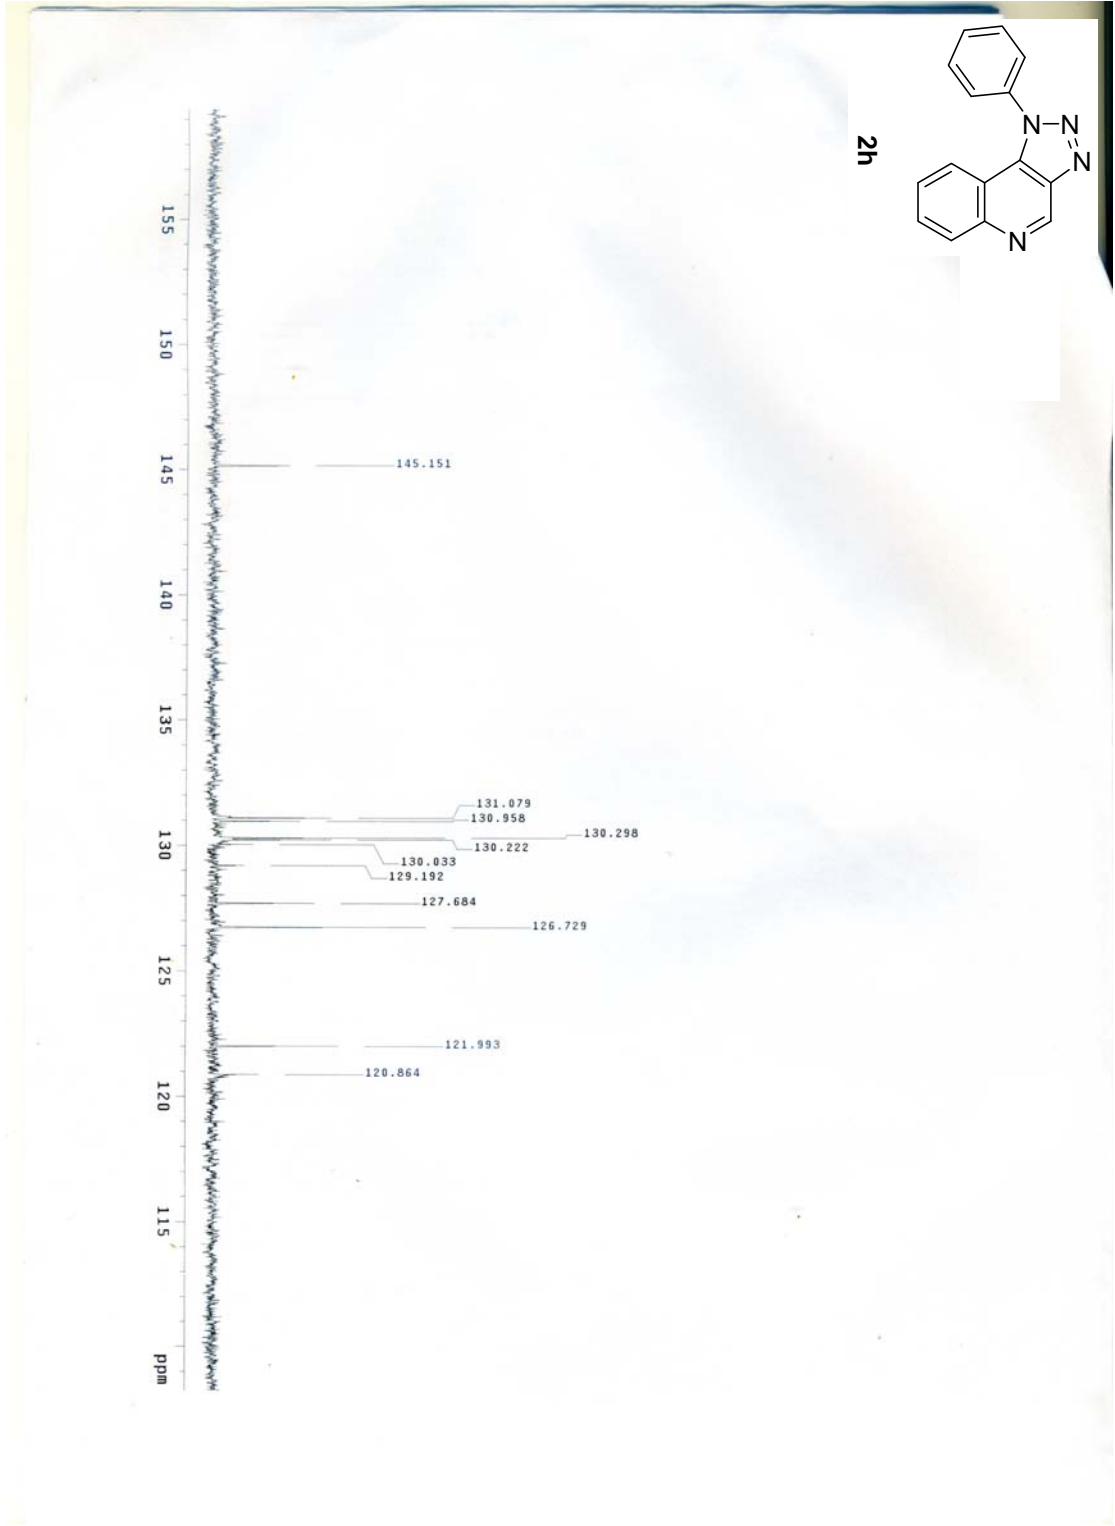

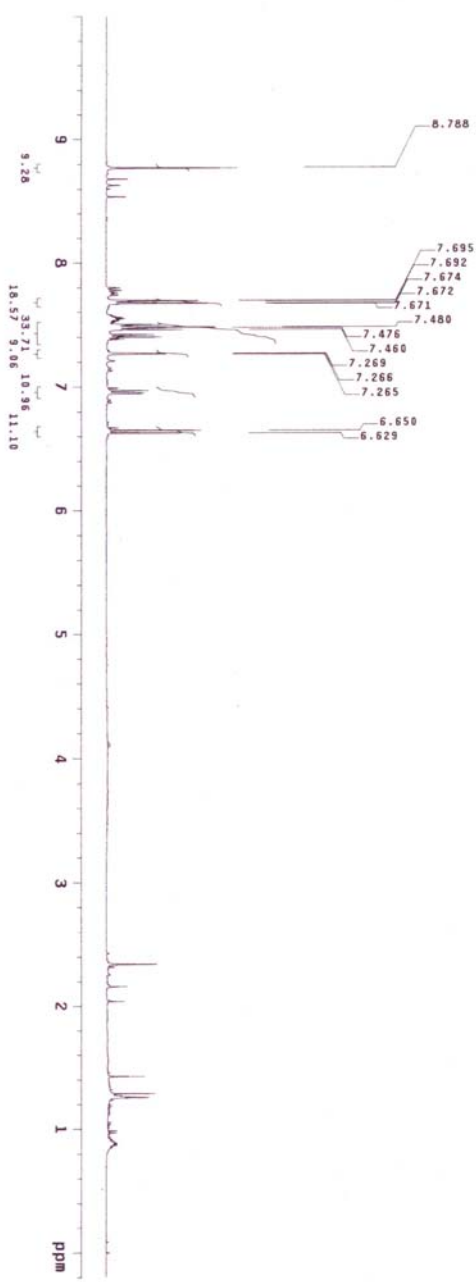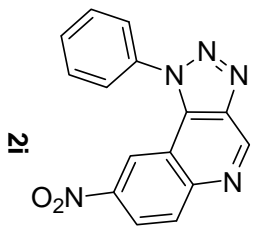

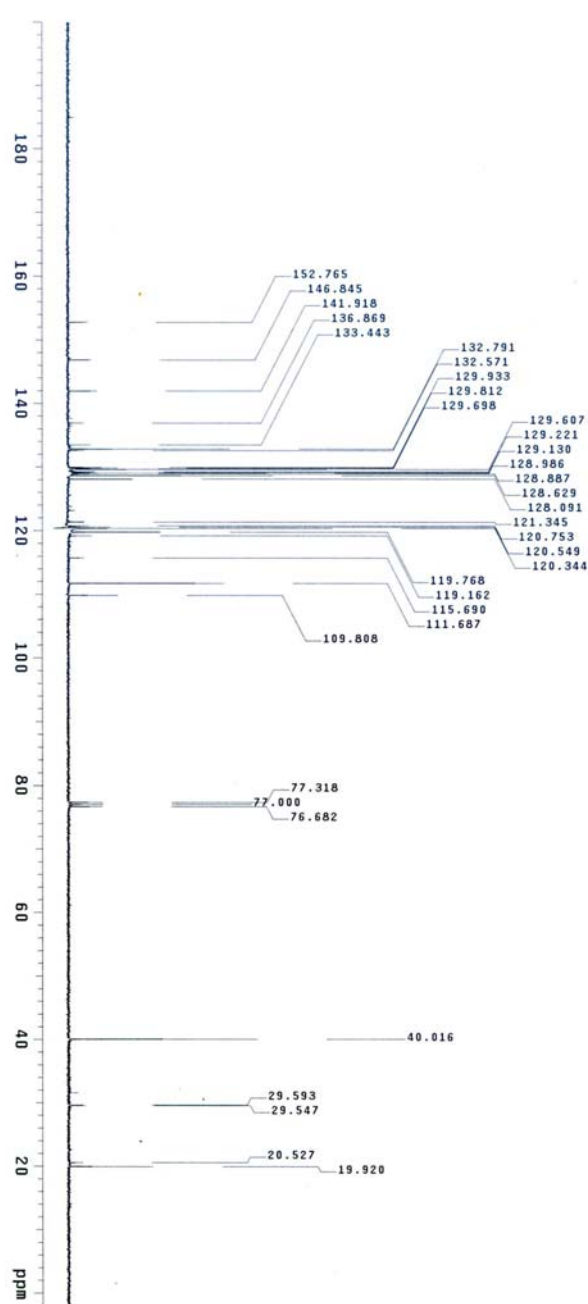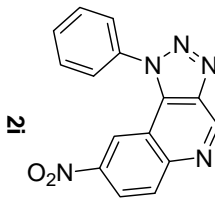

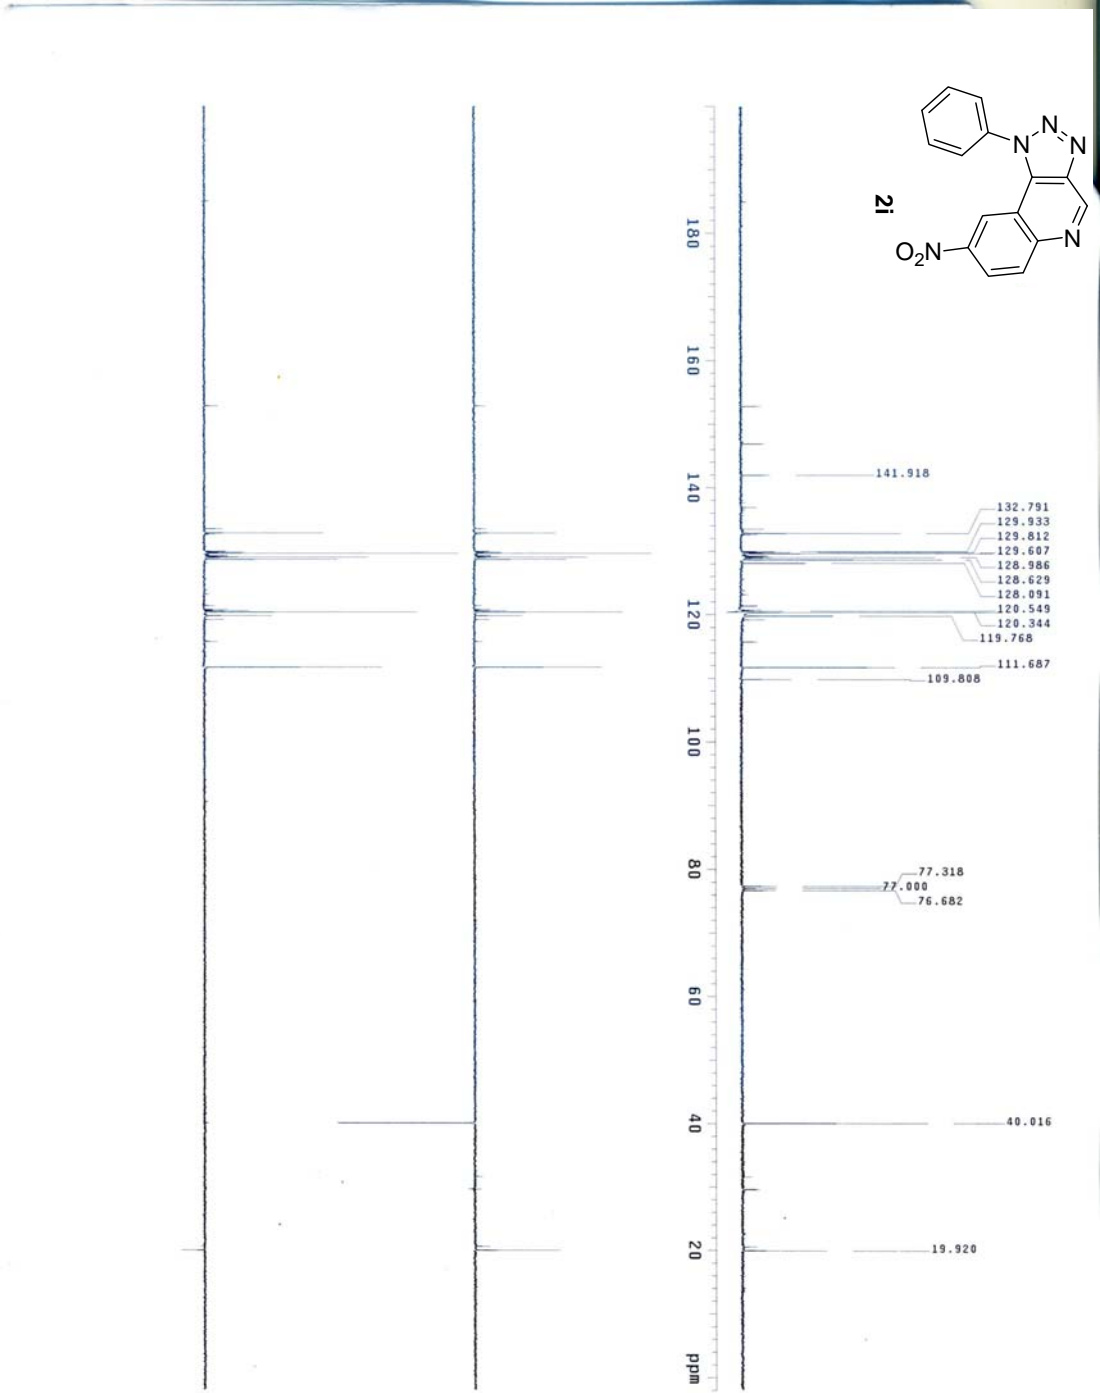

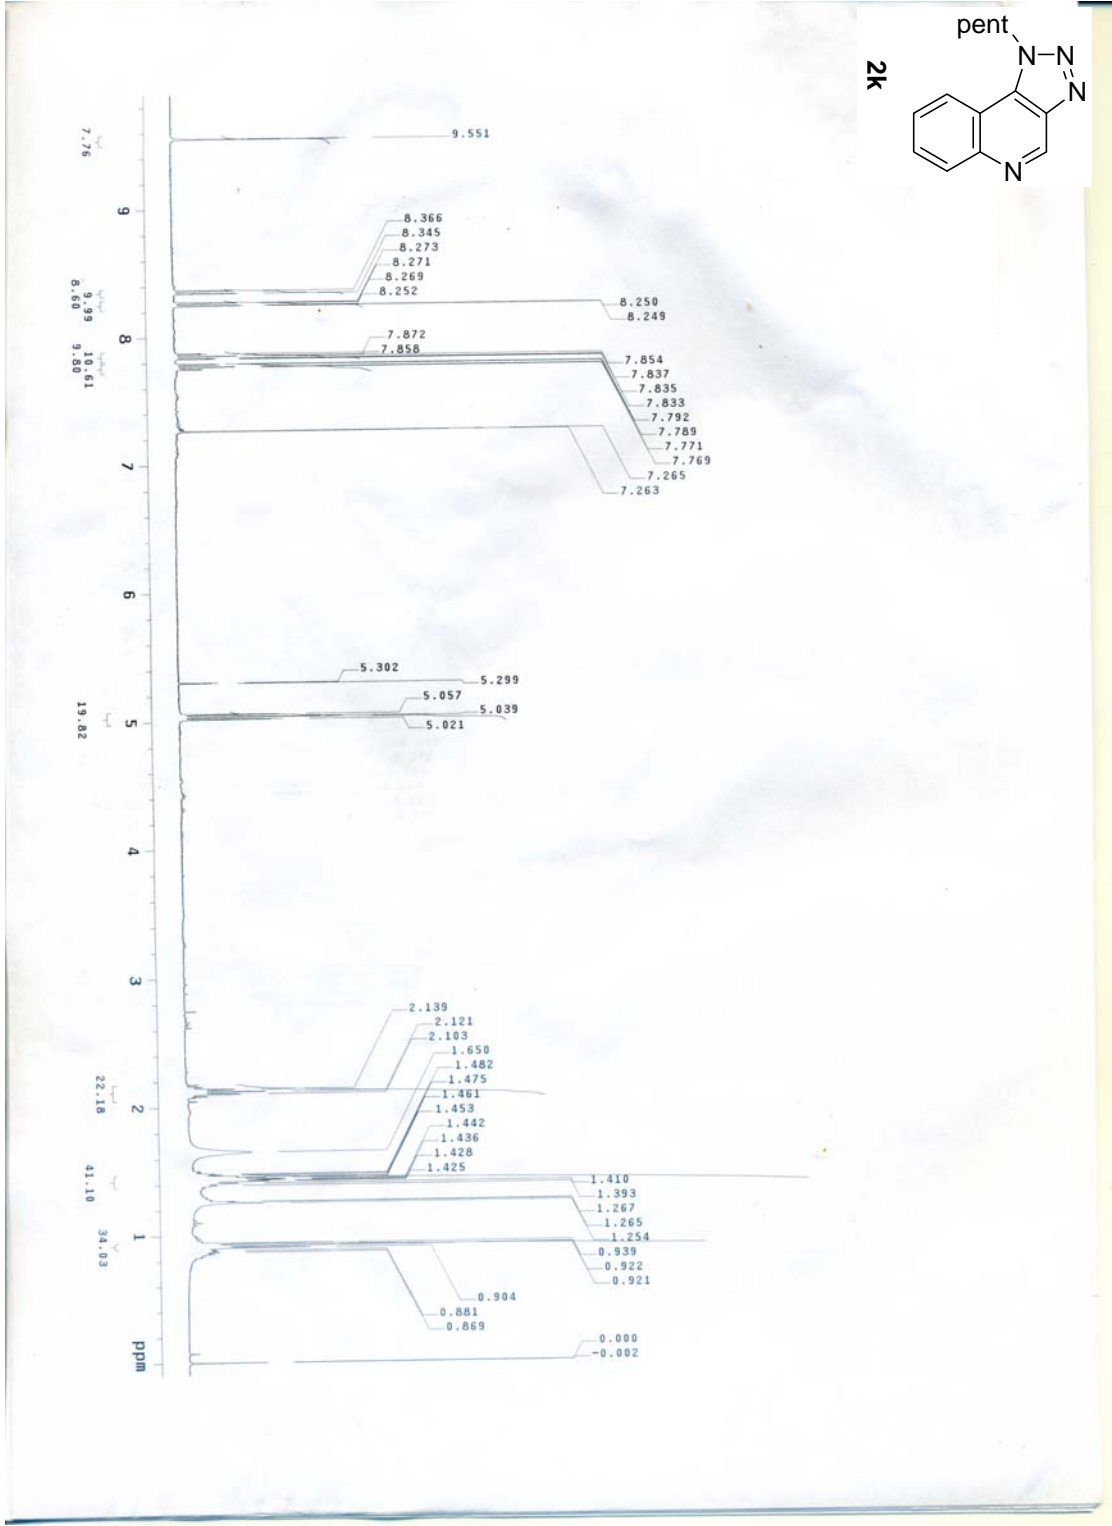

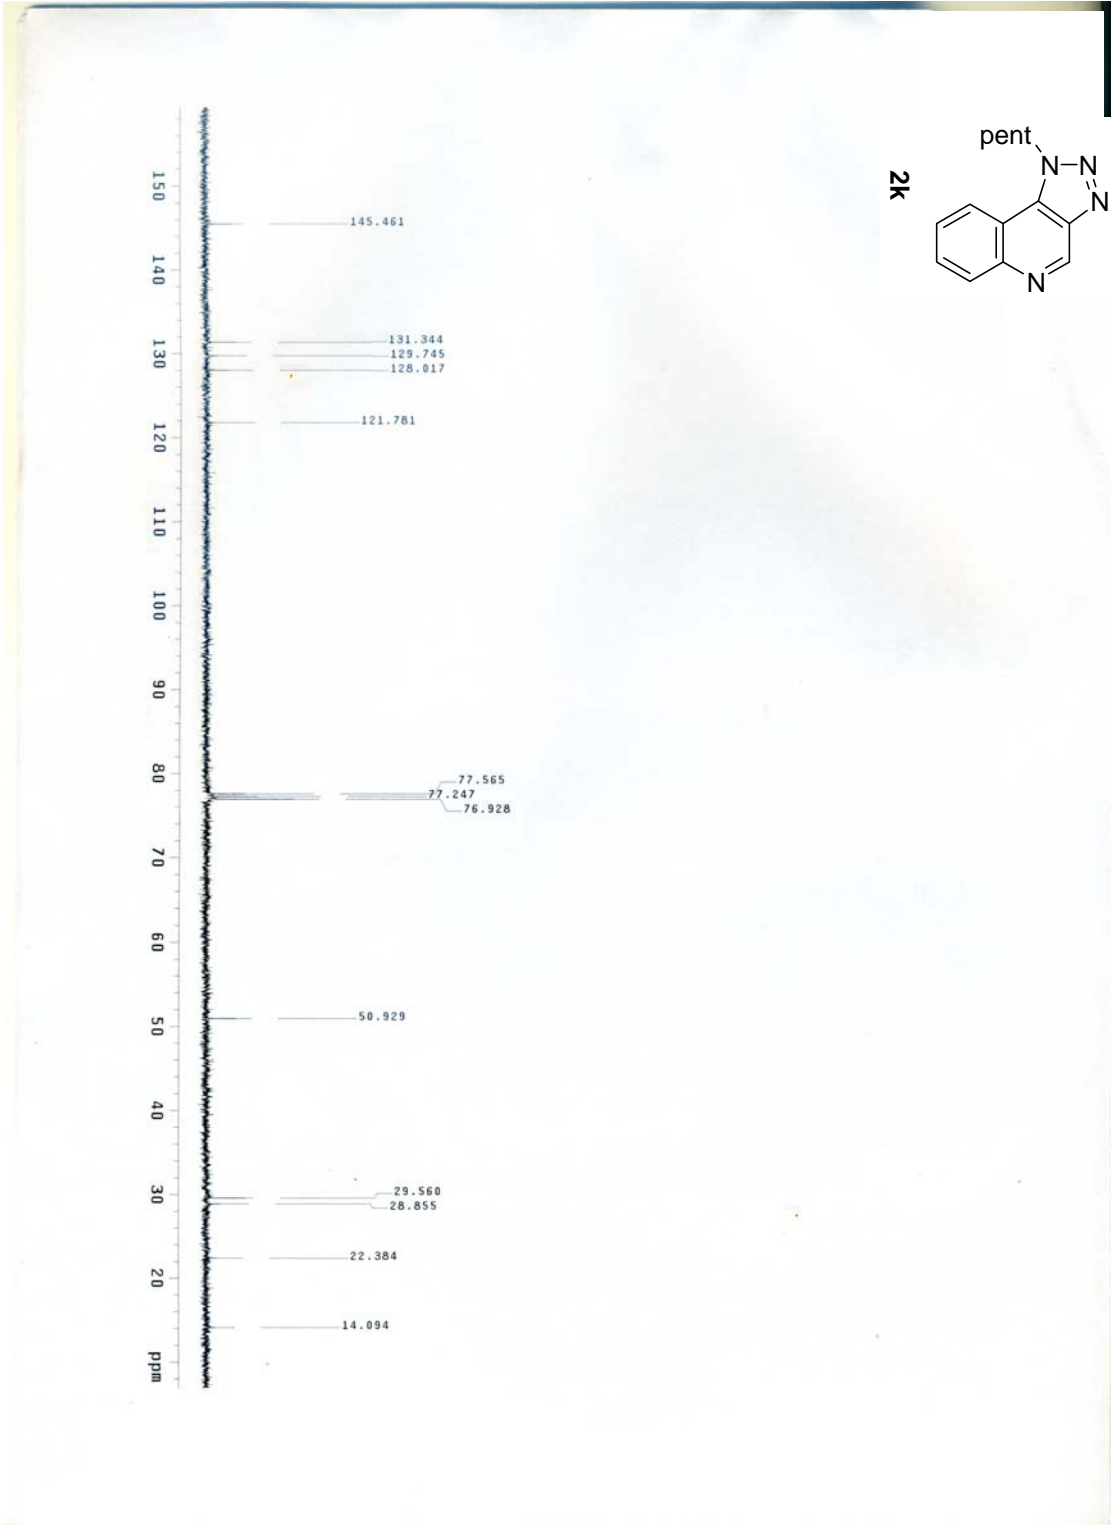

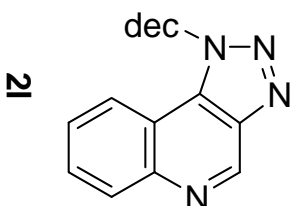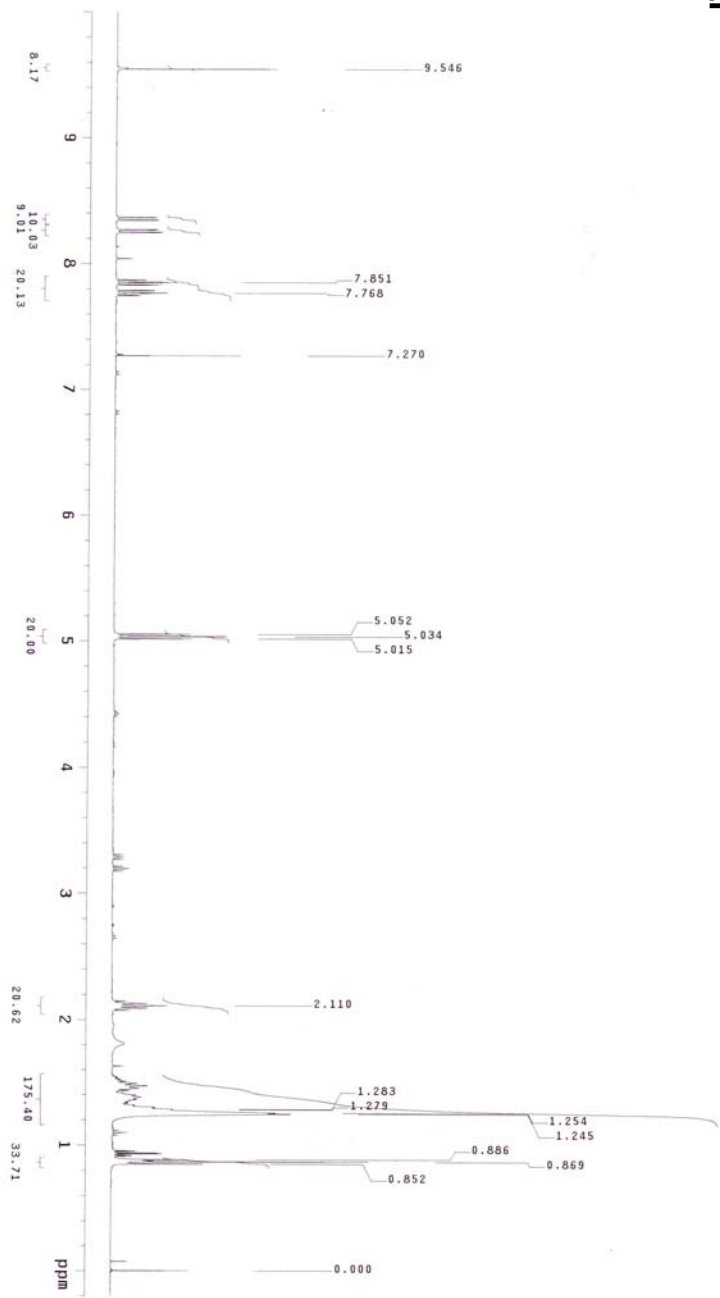

21

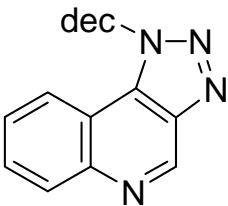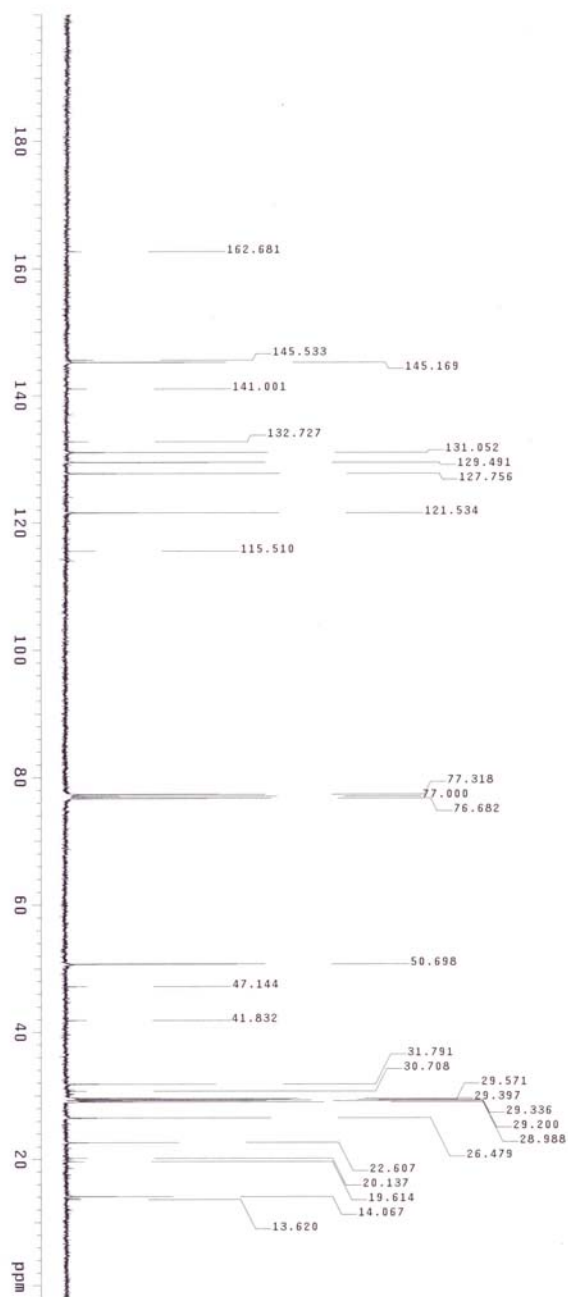

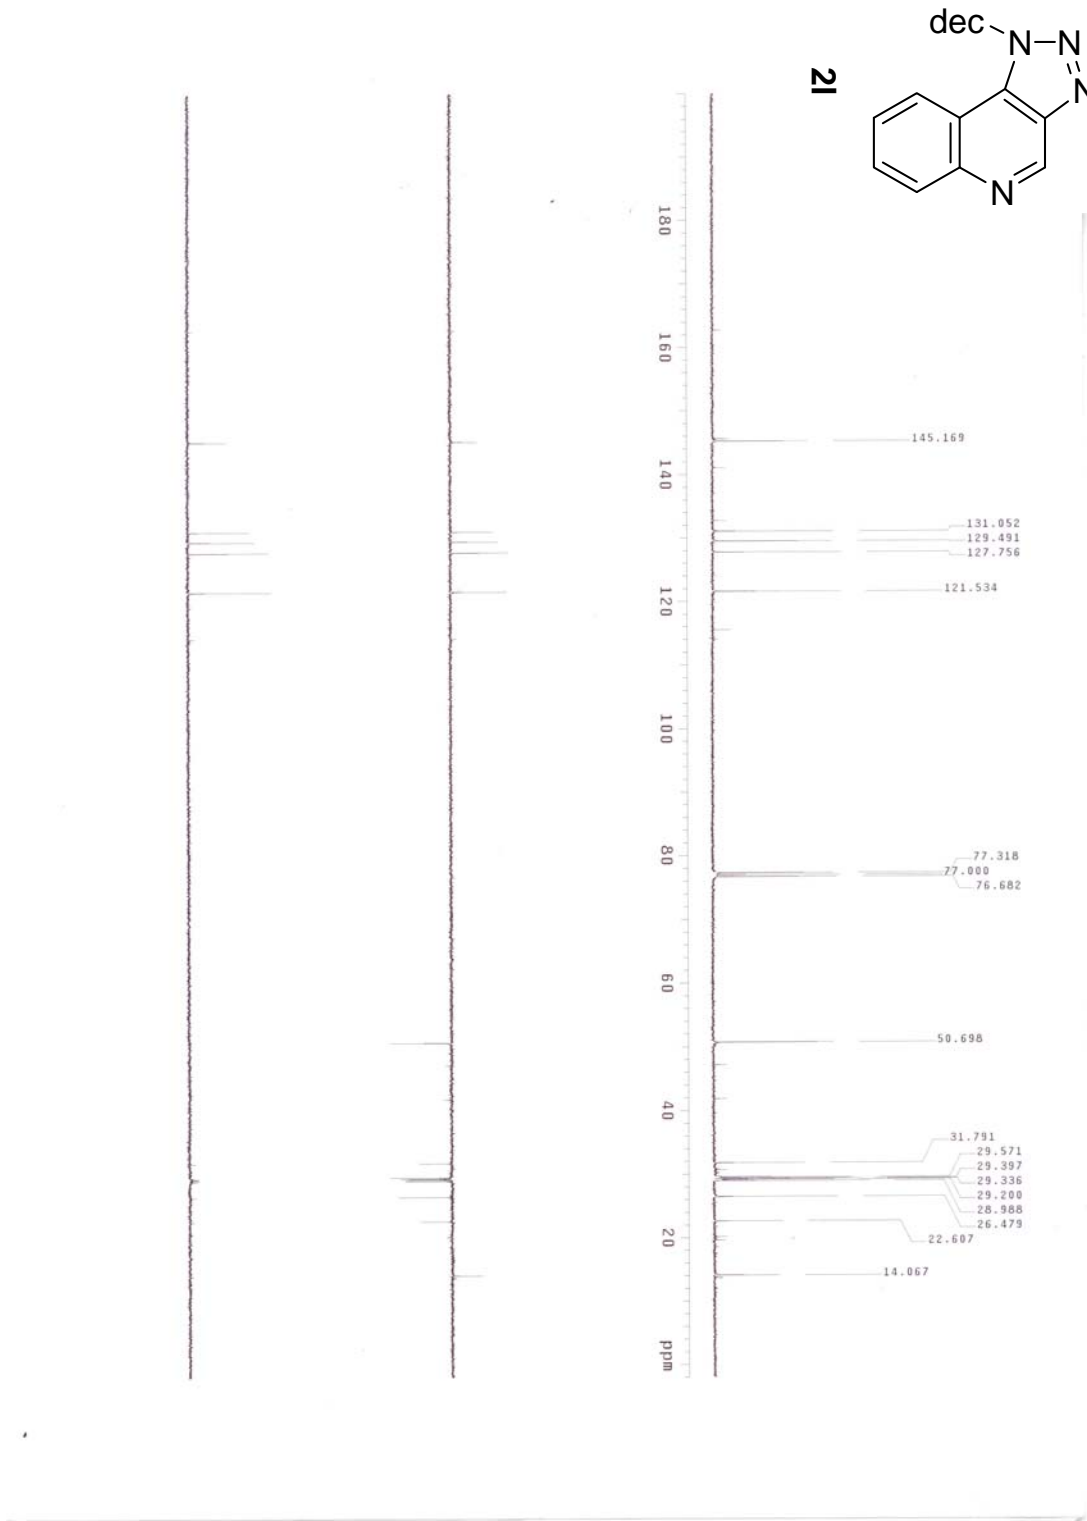

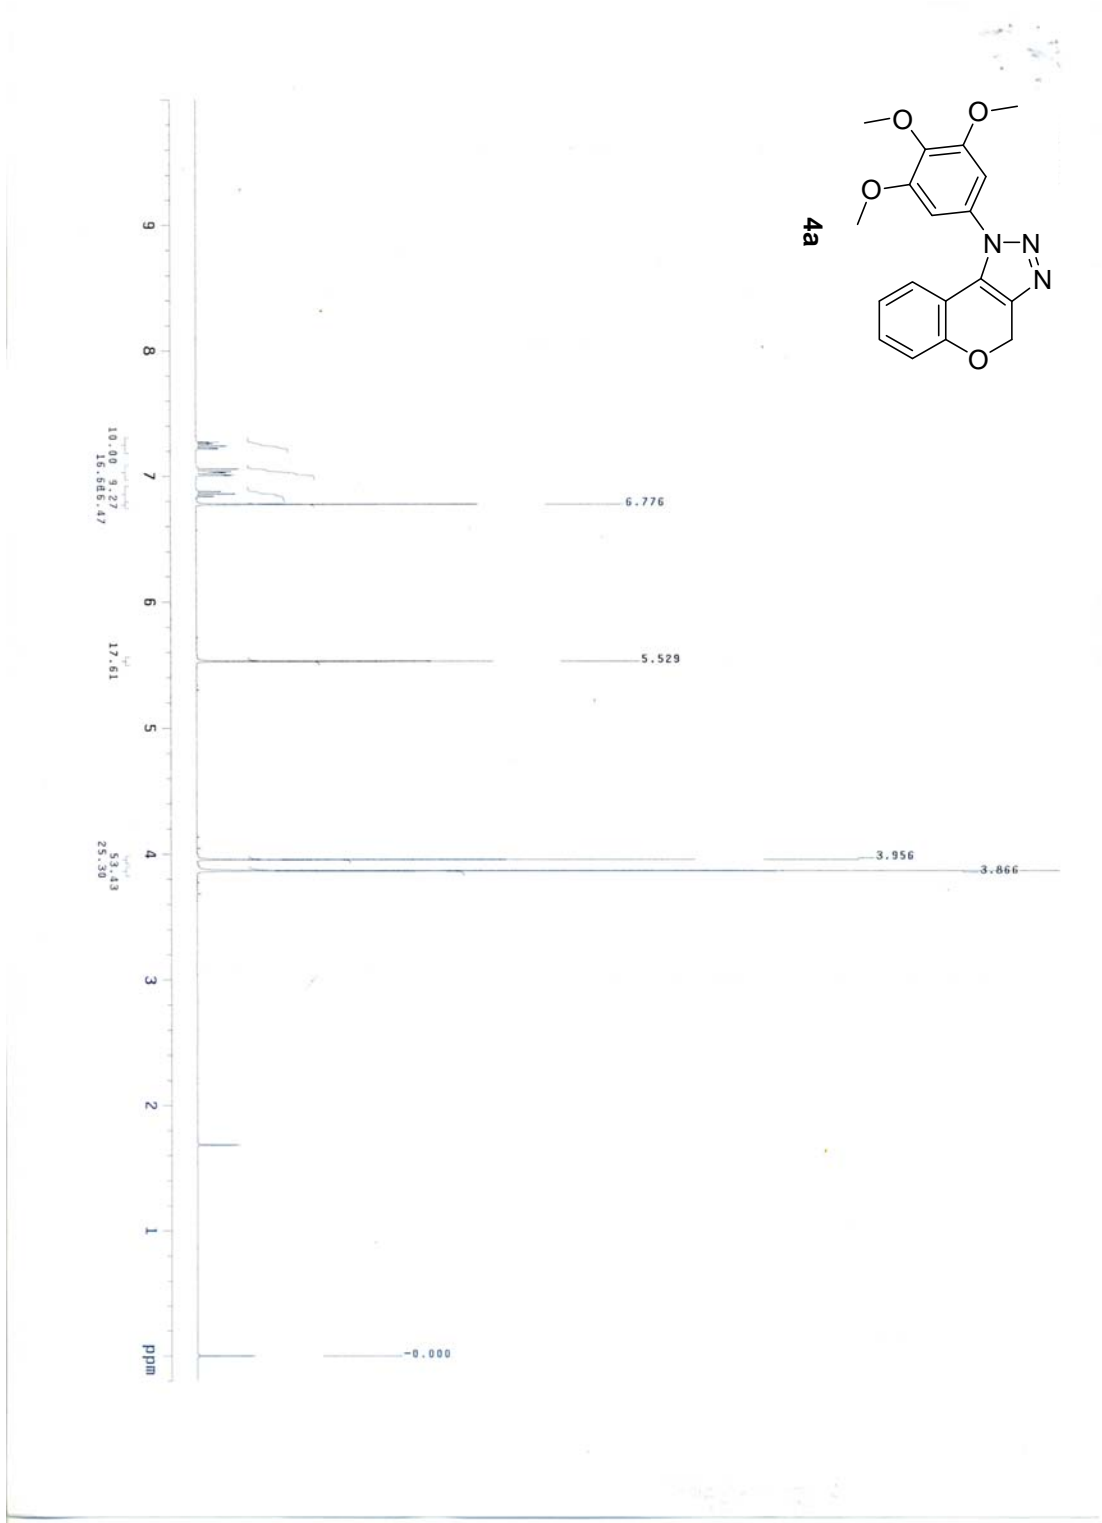

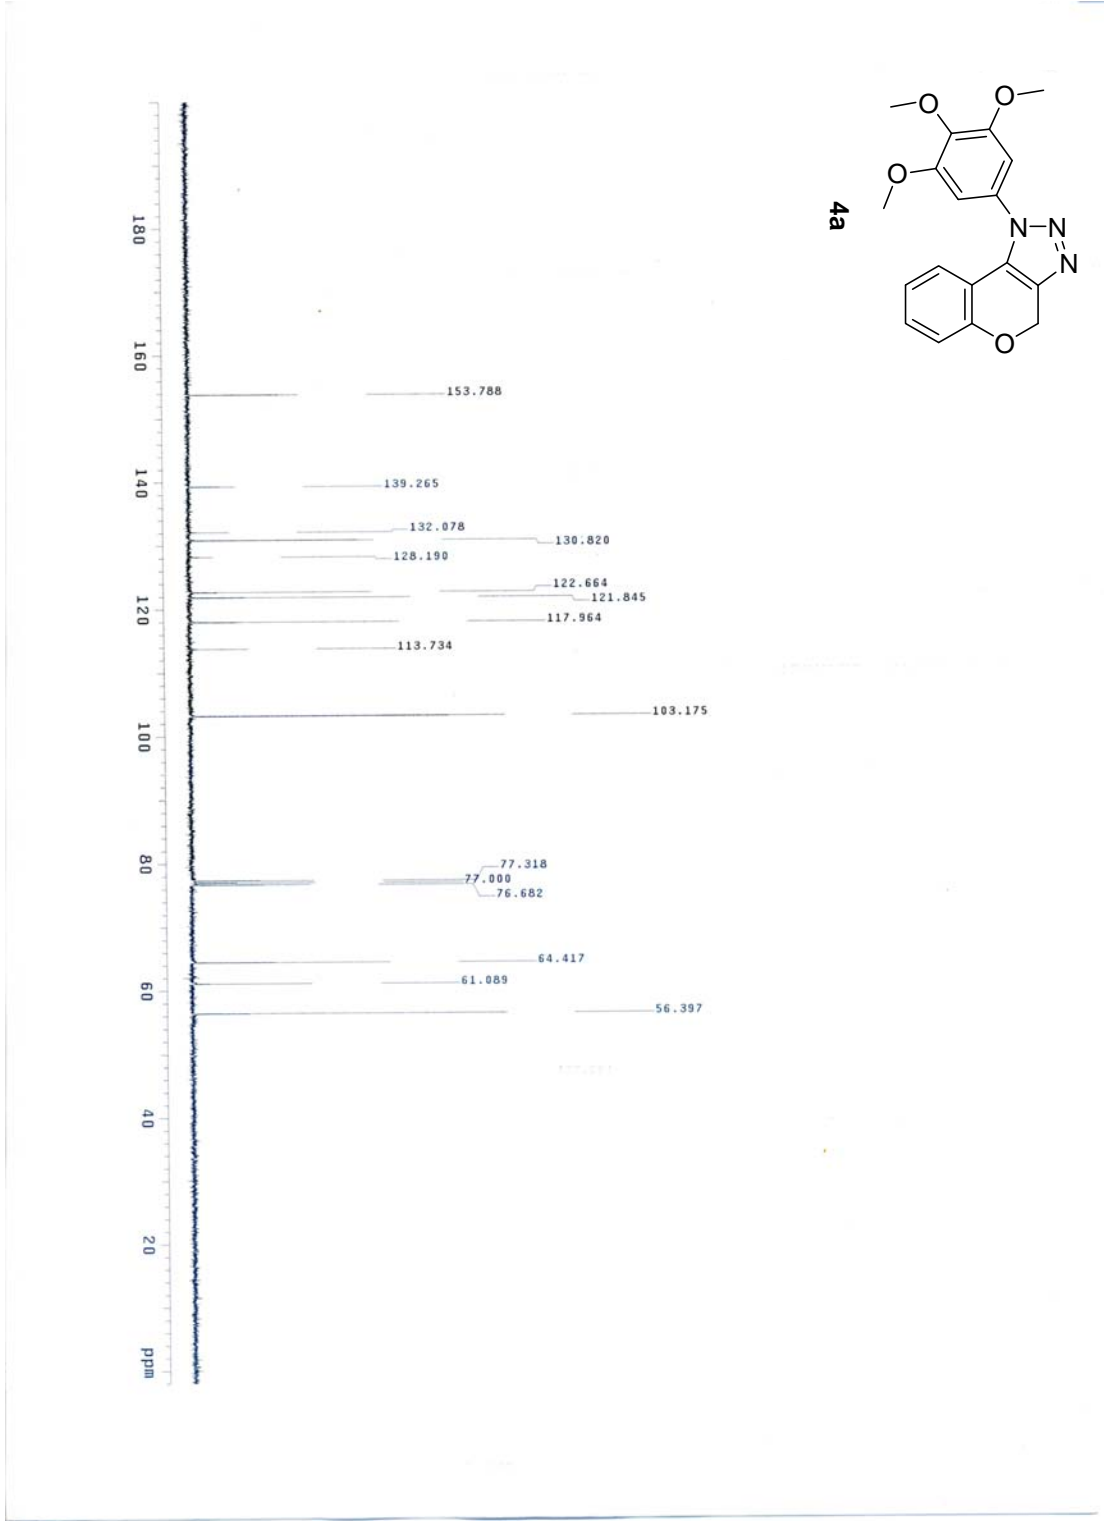

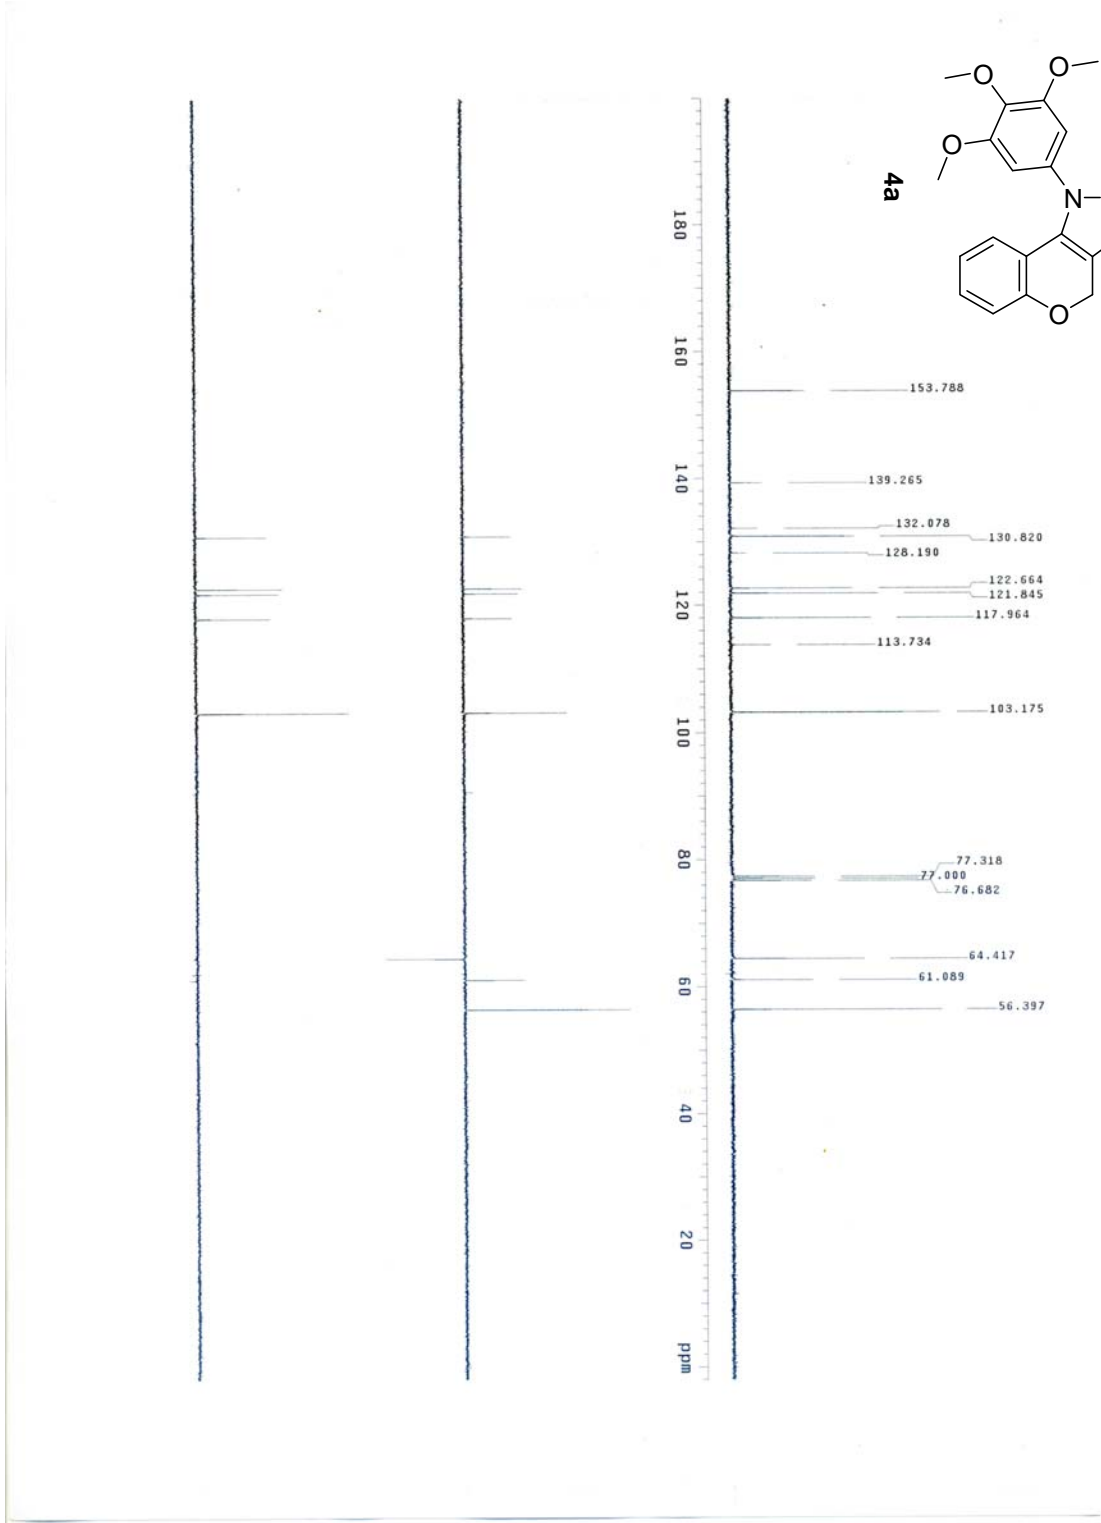

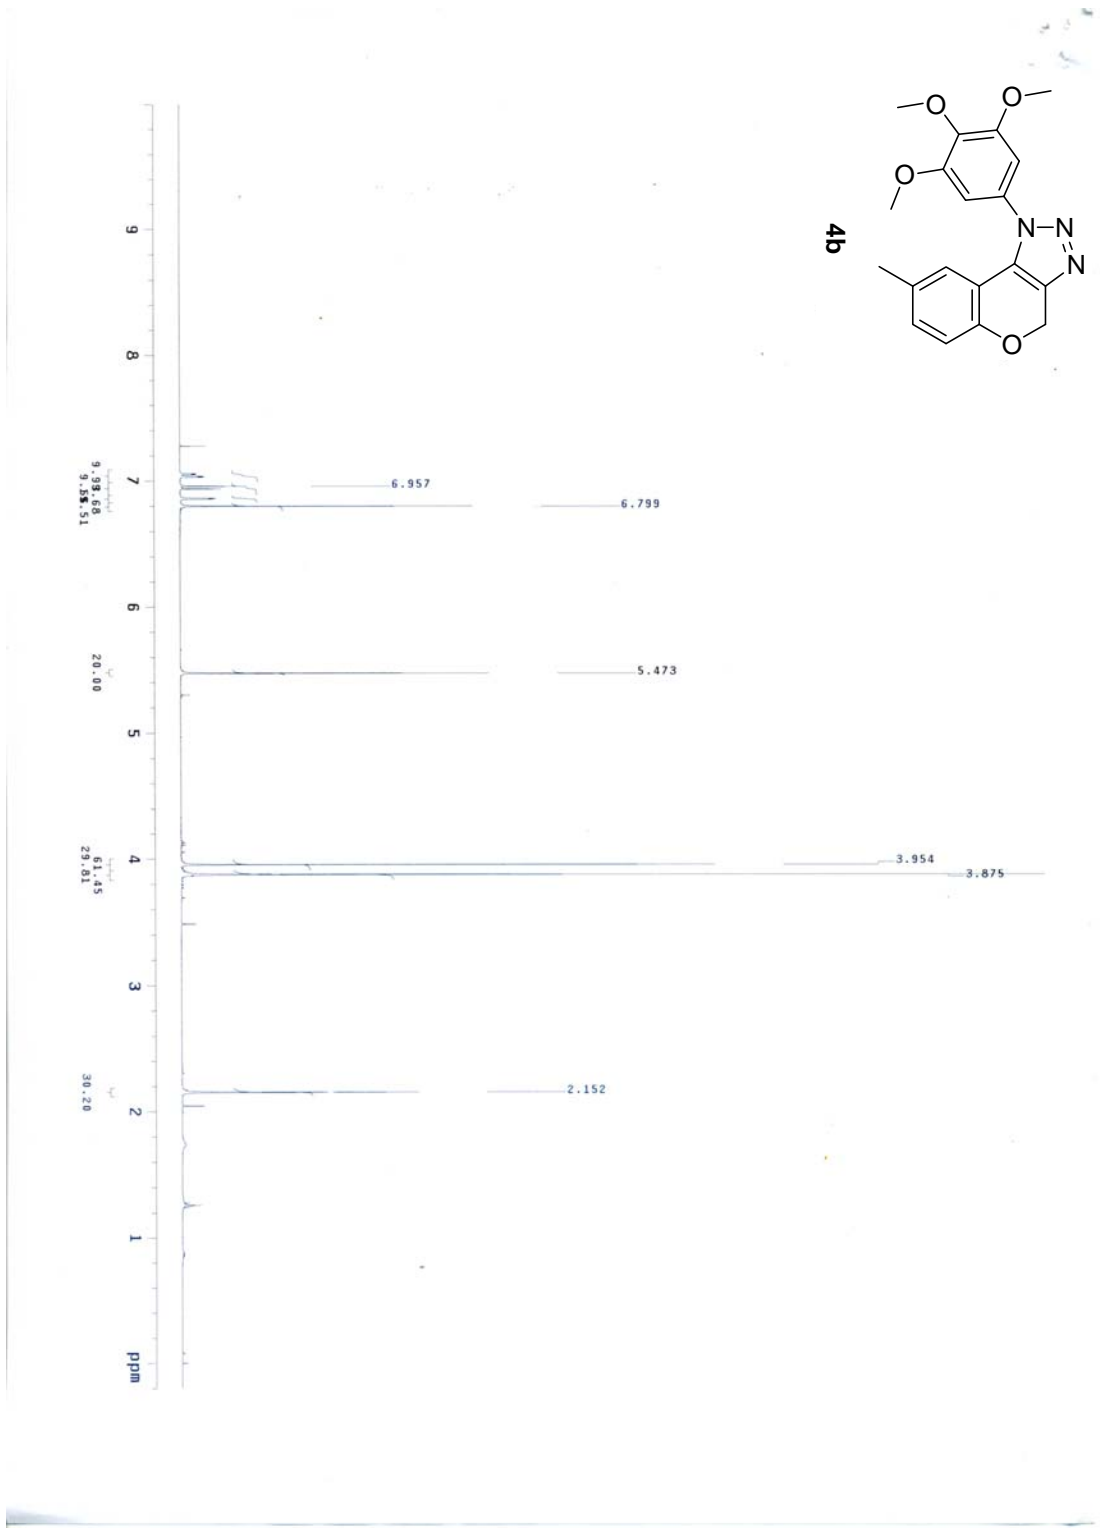

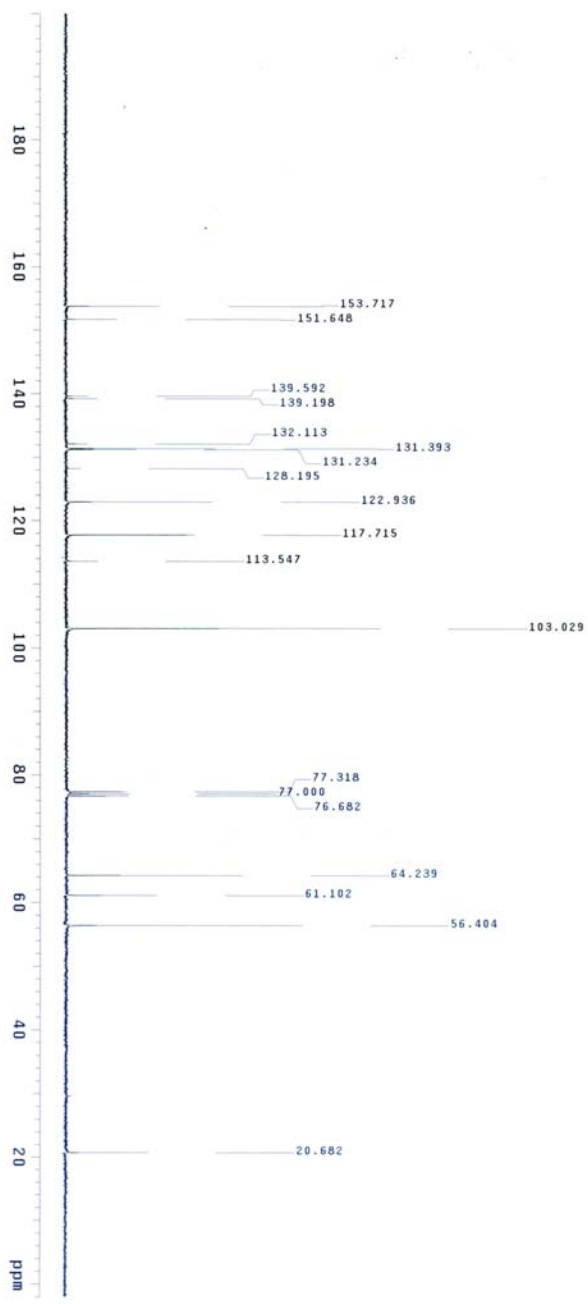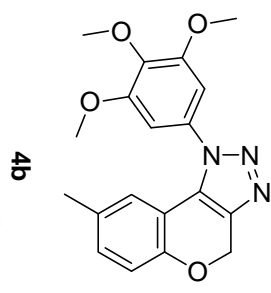

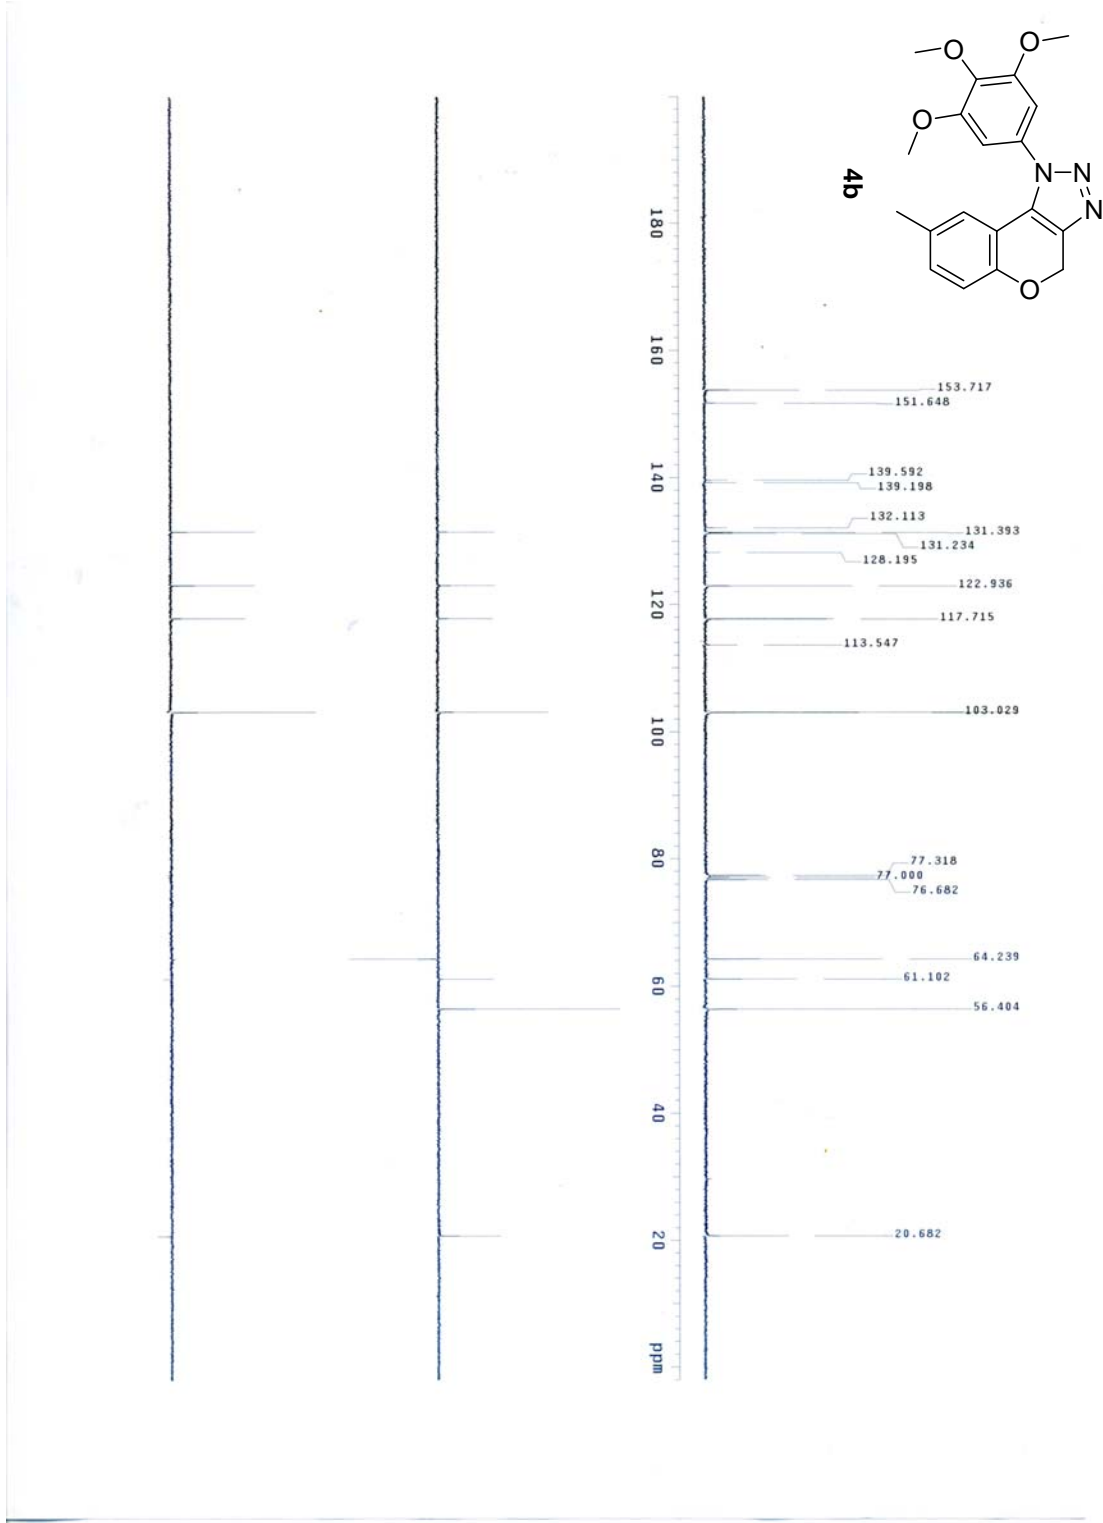

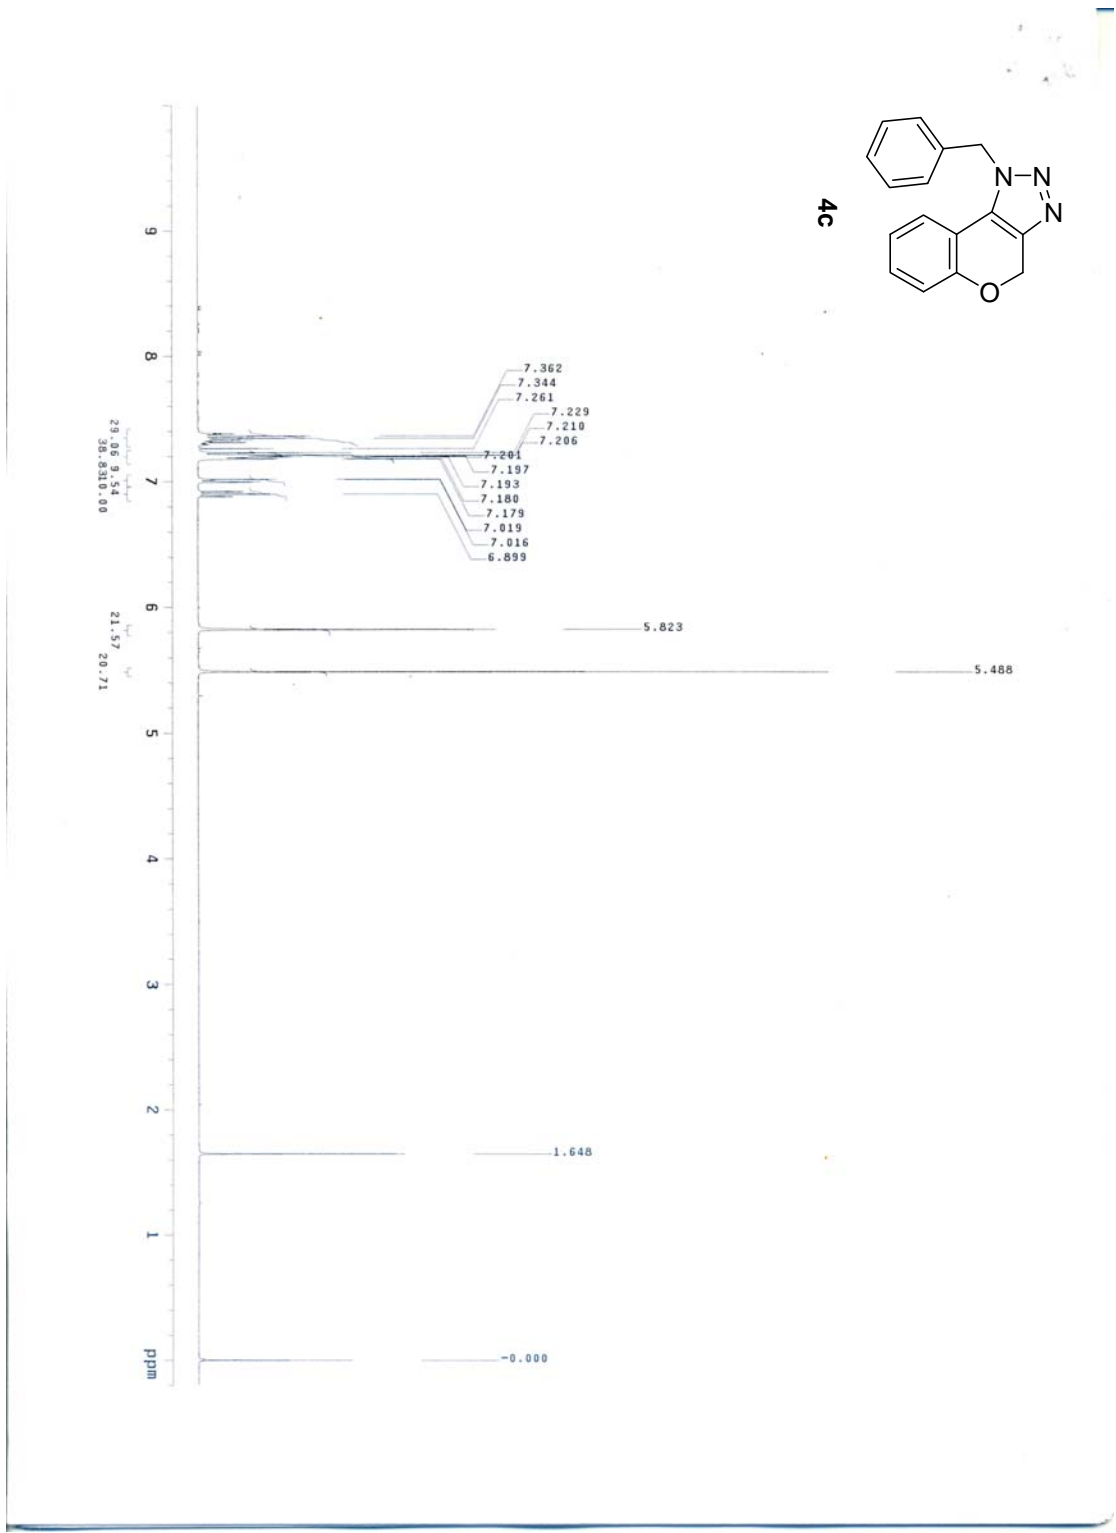

4c

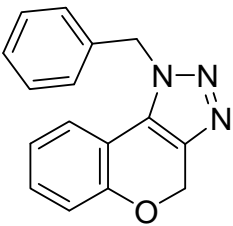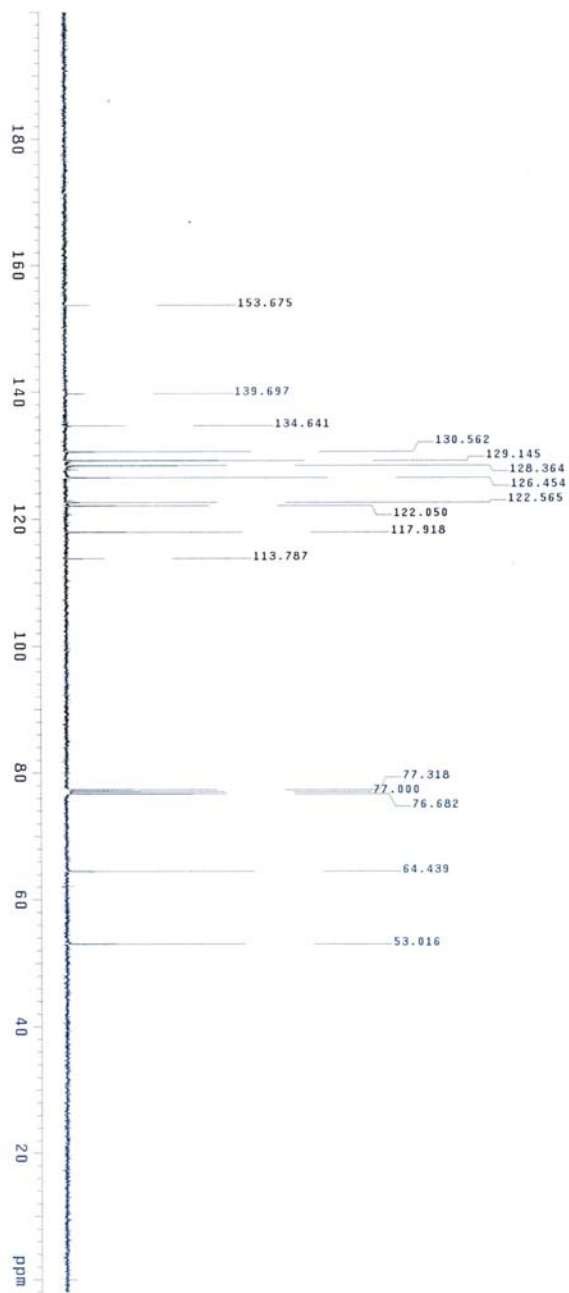

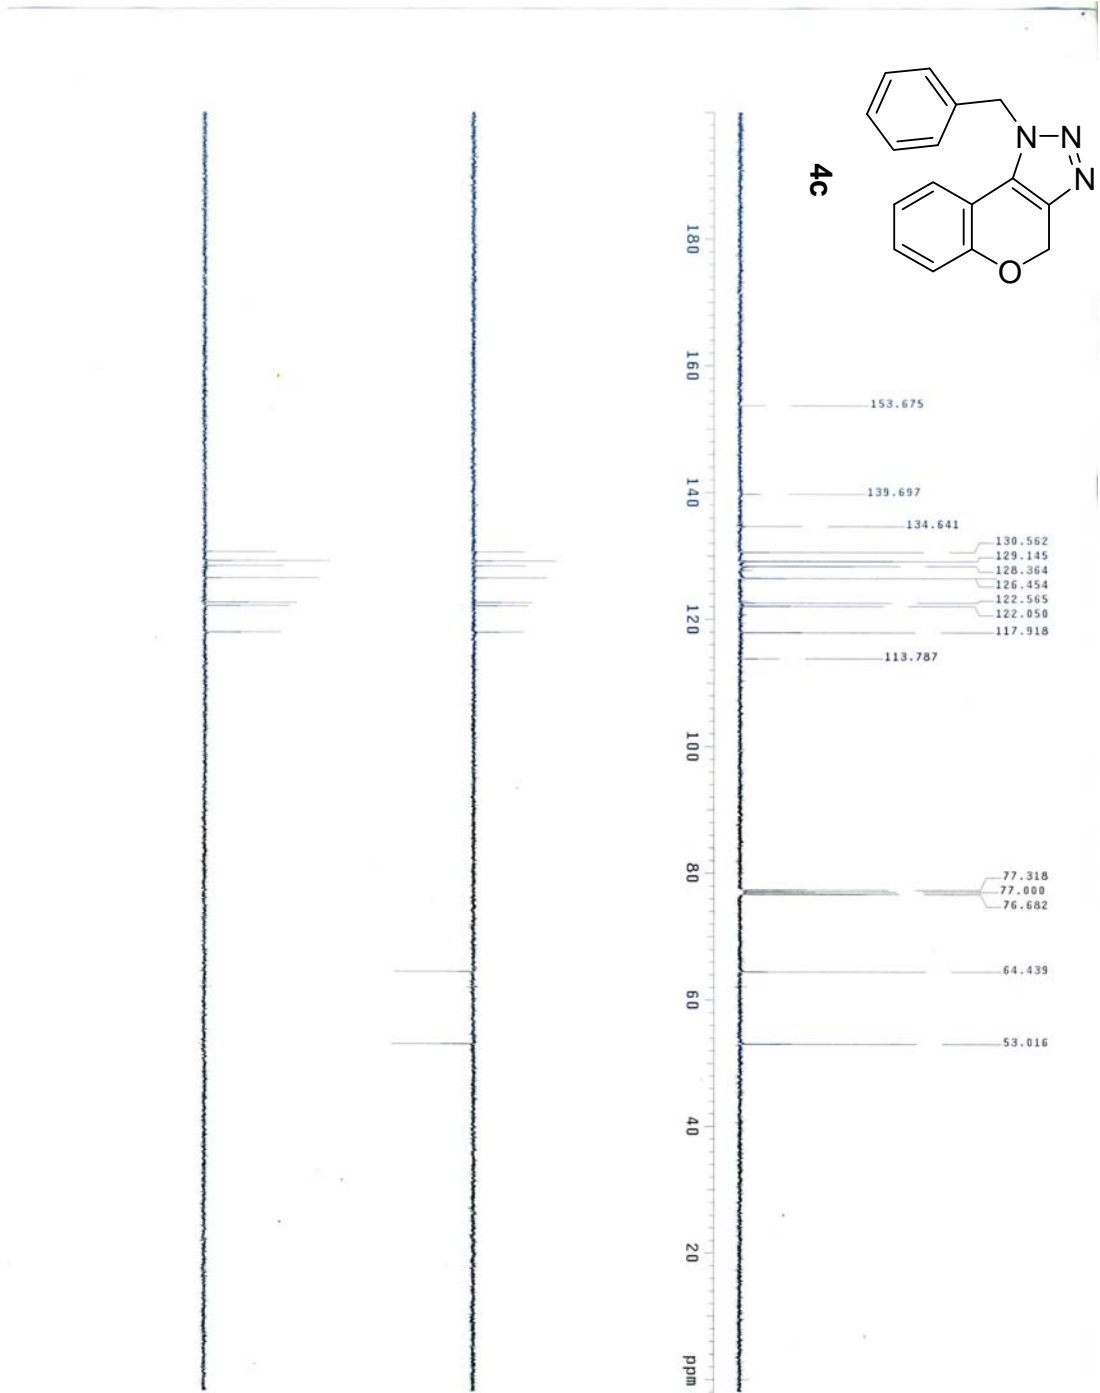

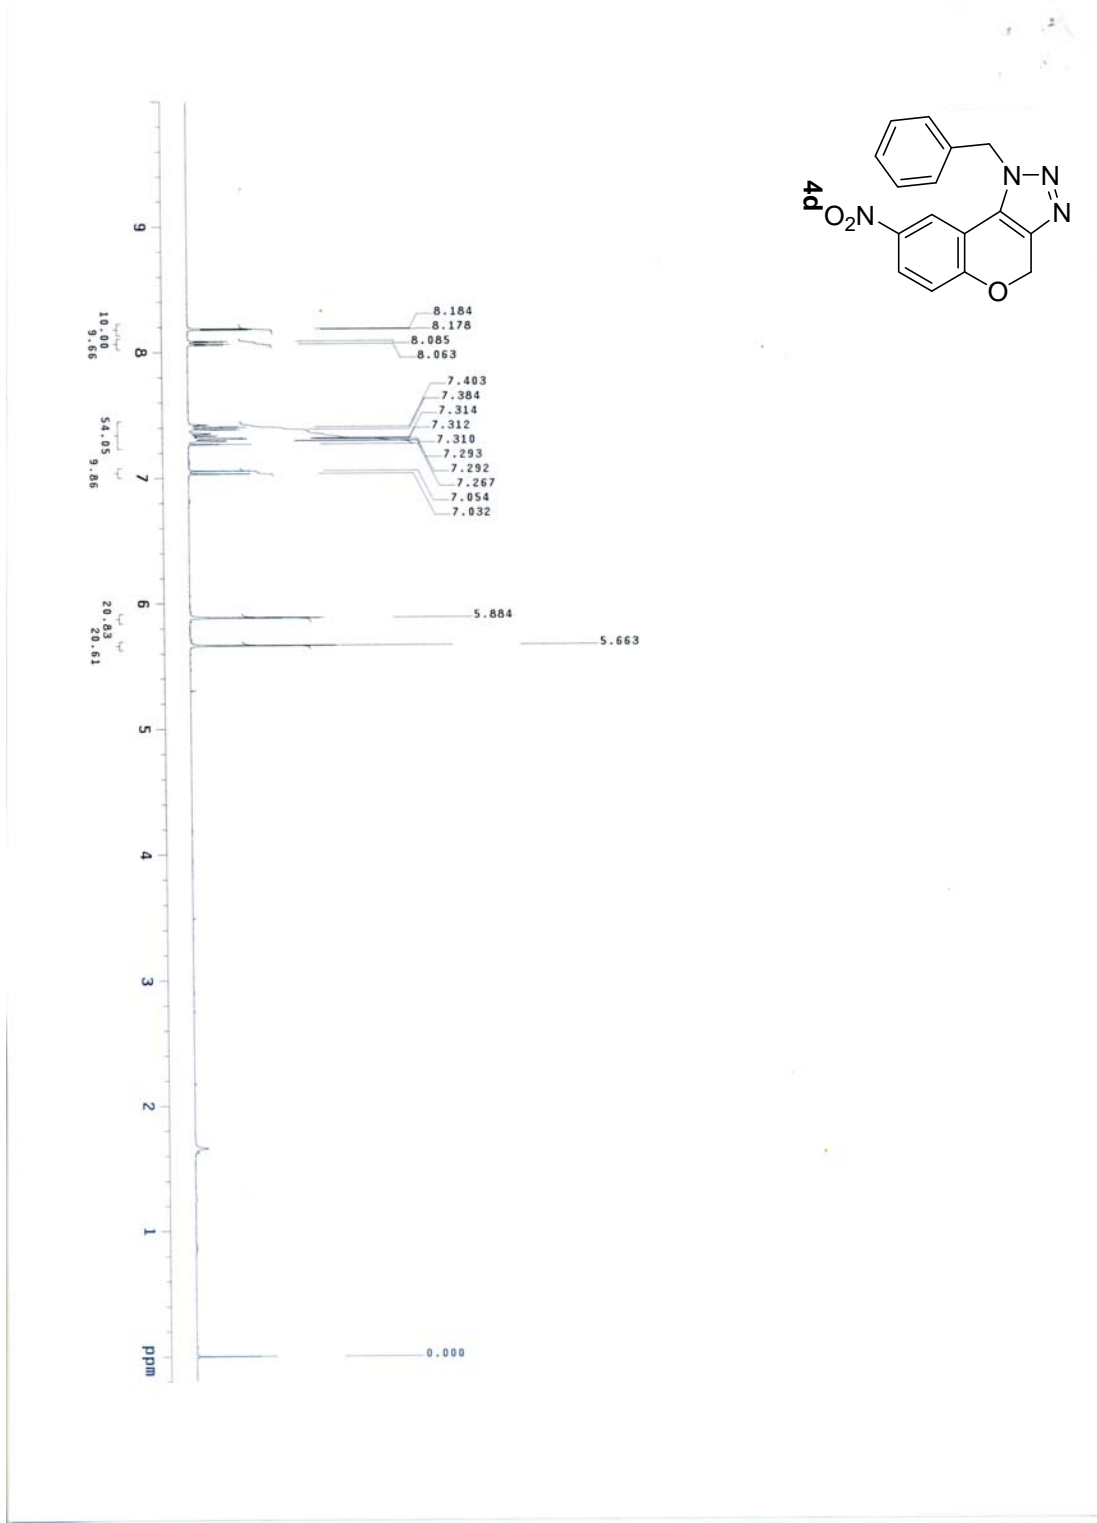

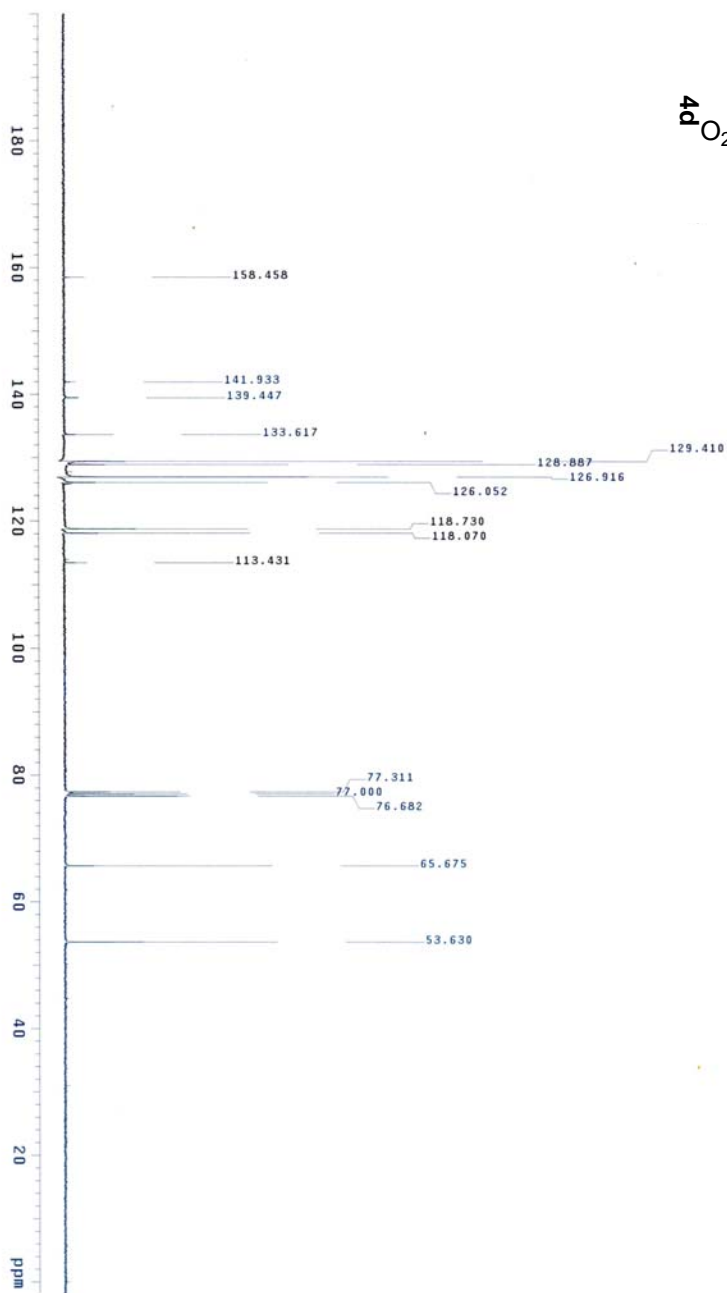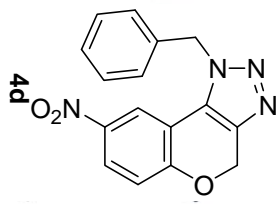

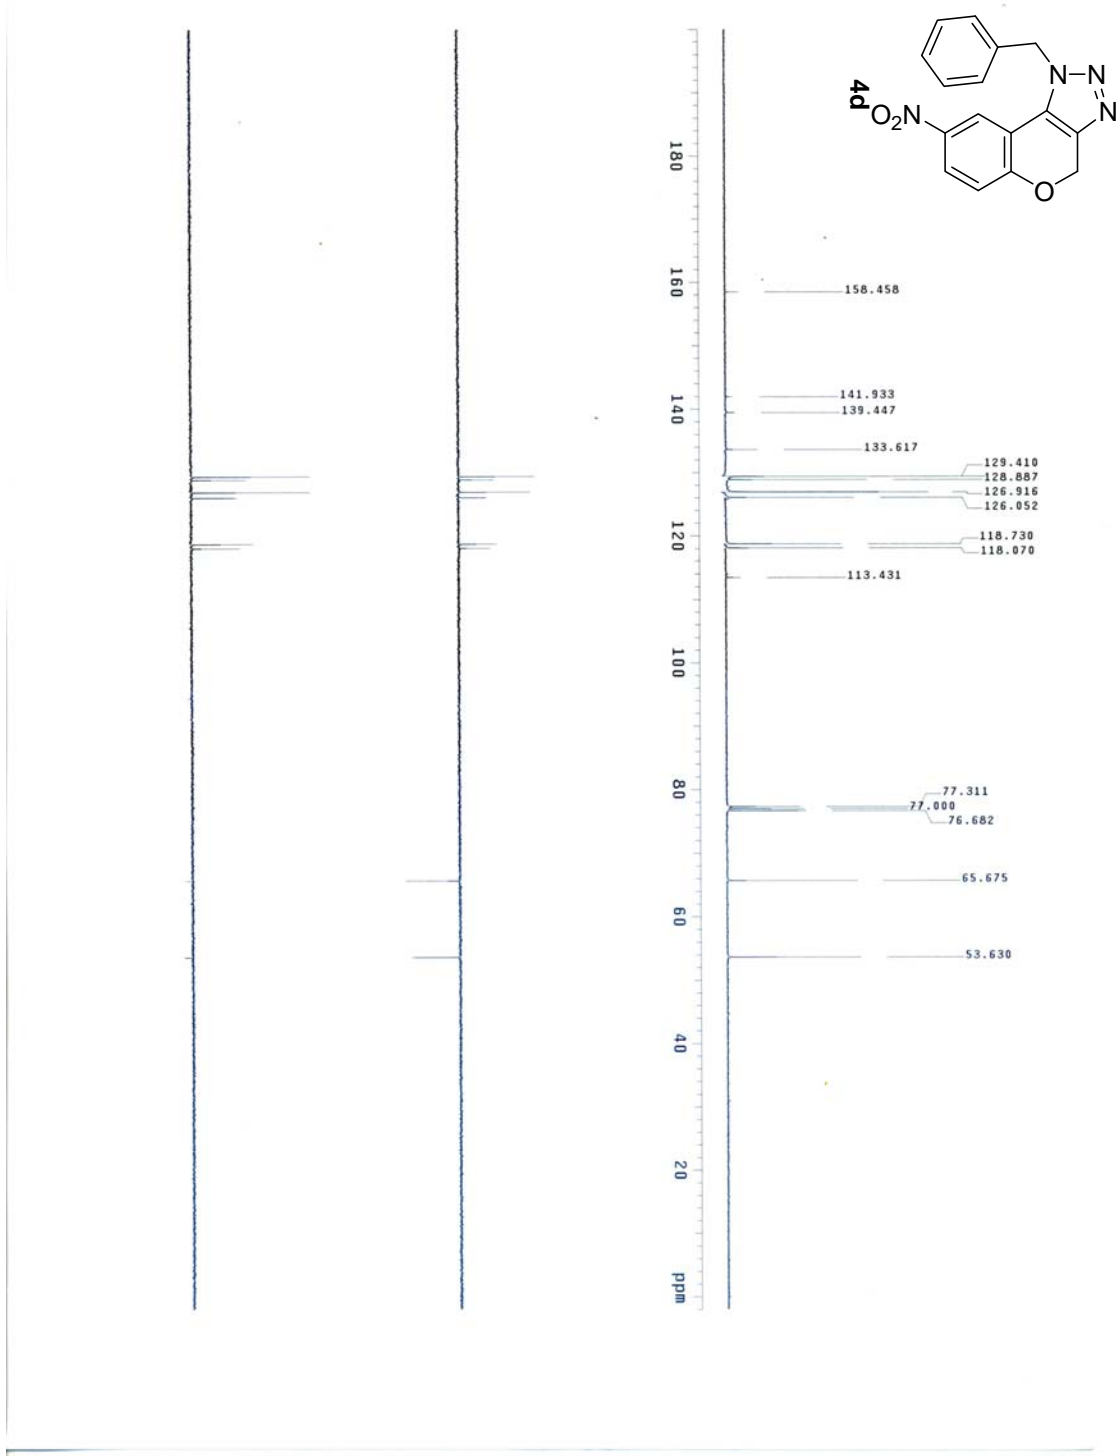

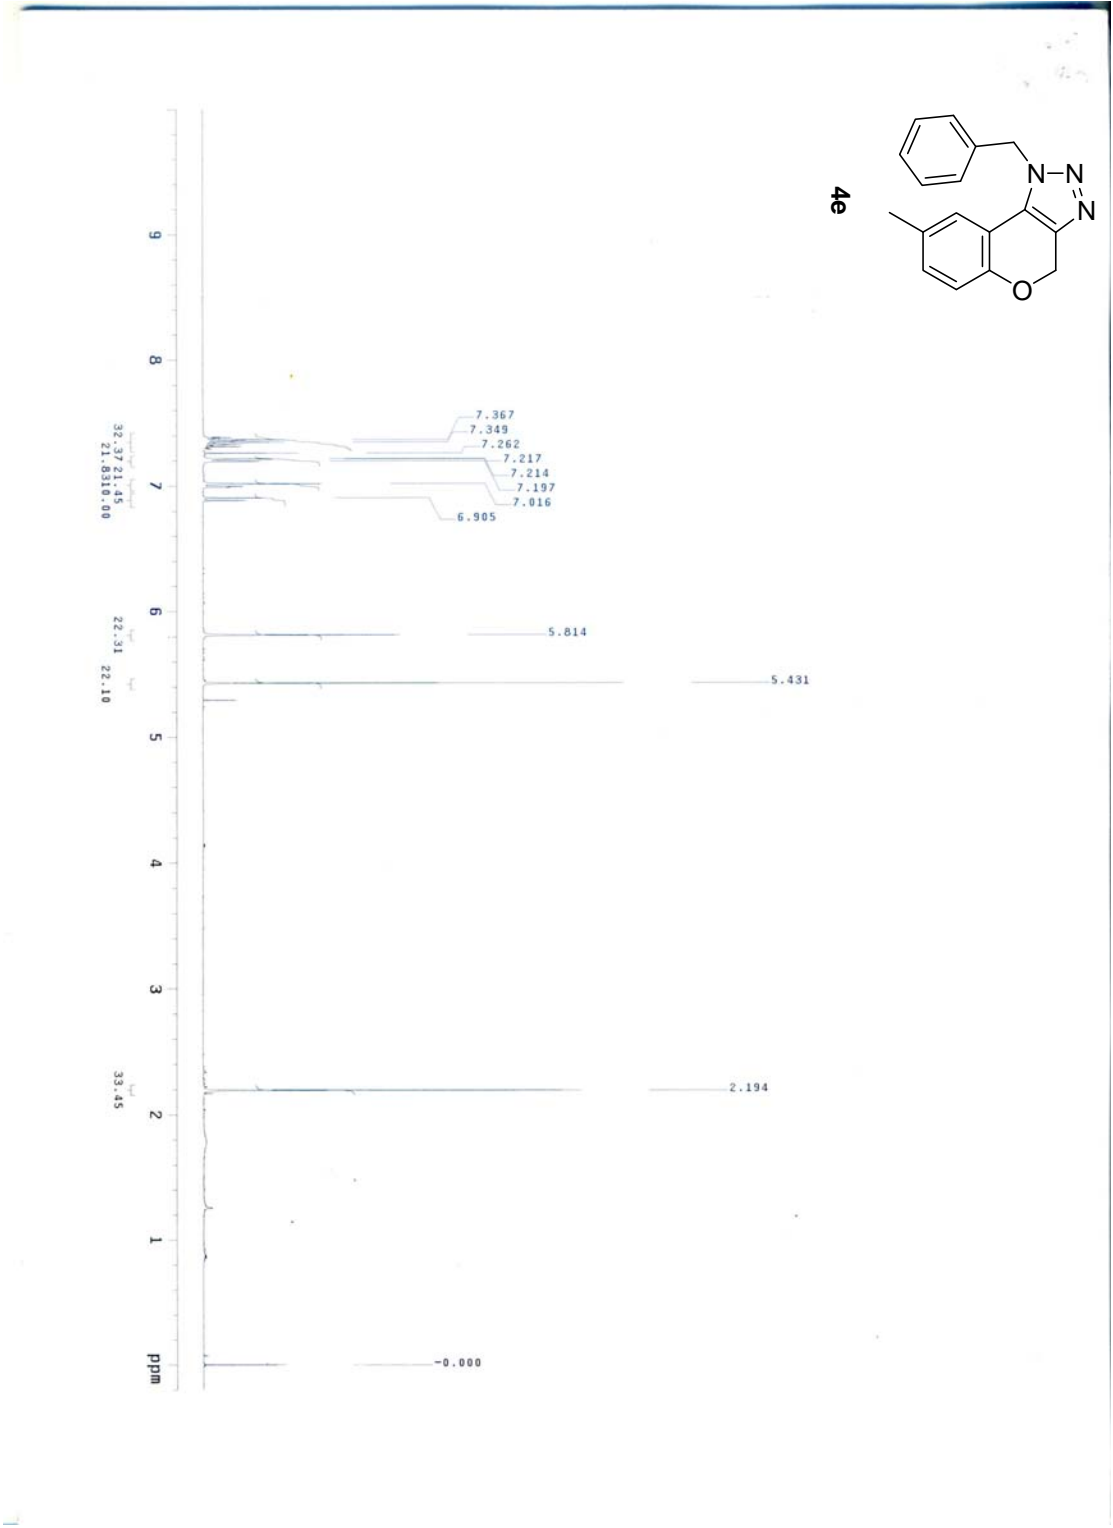

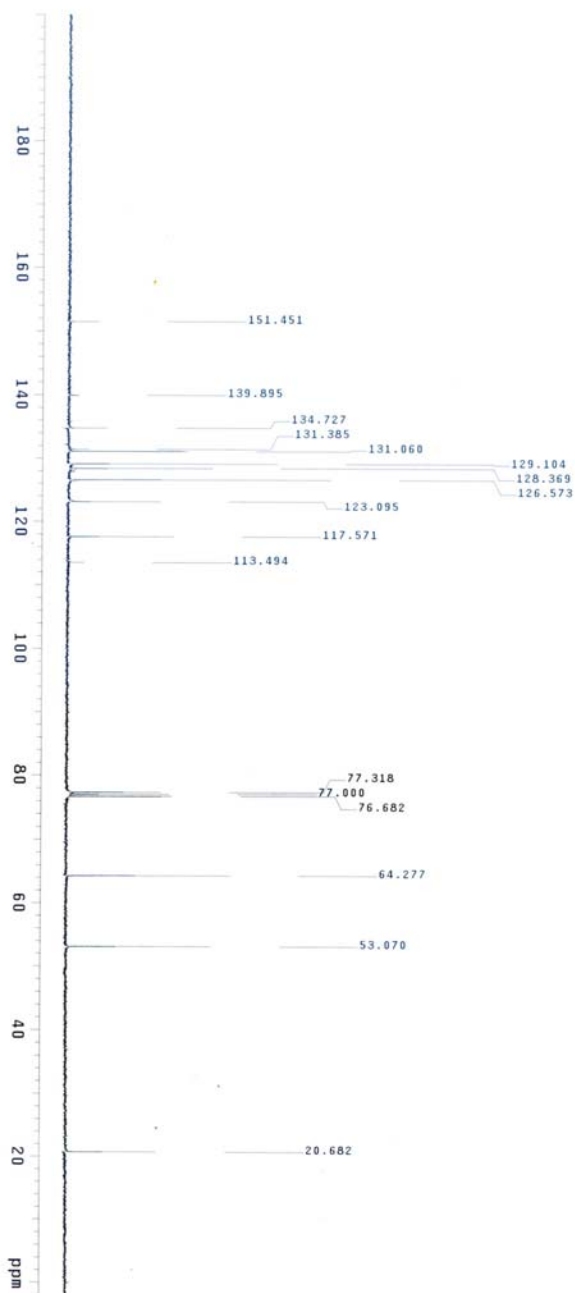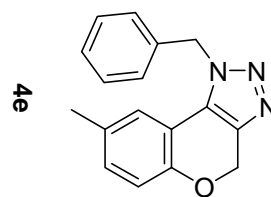

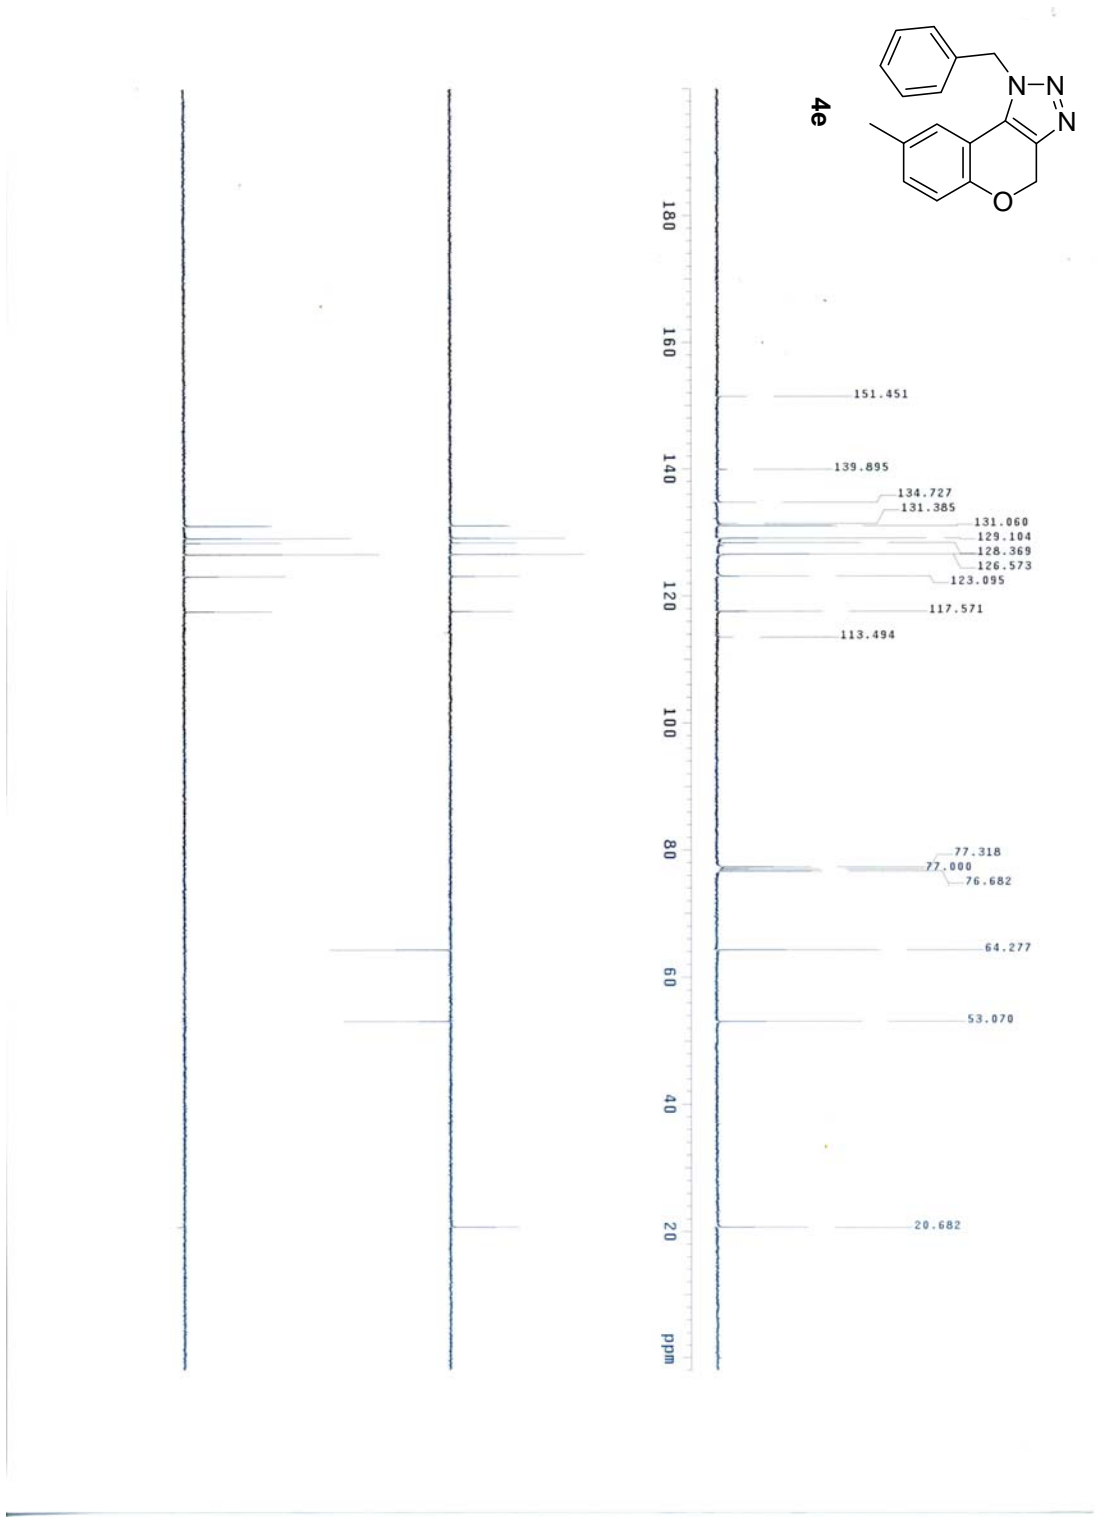

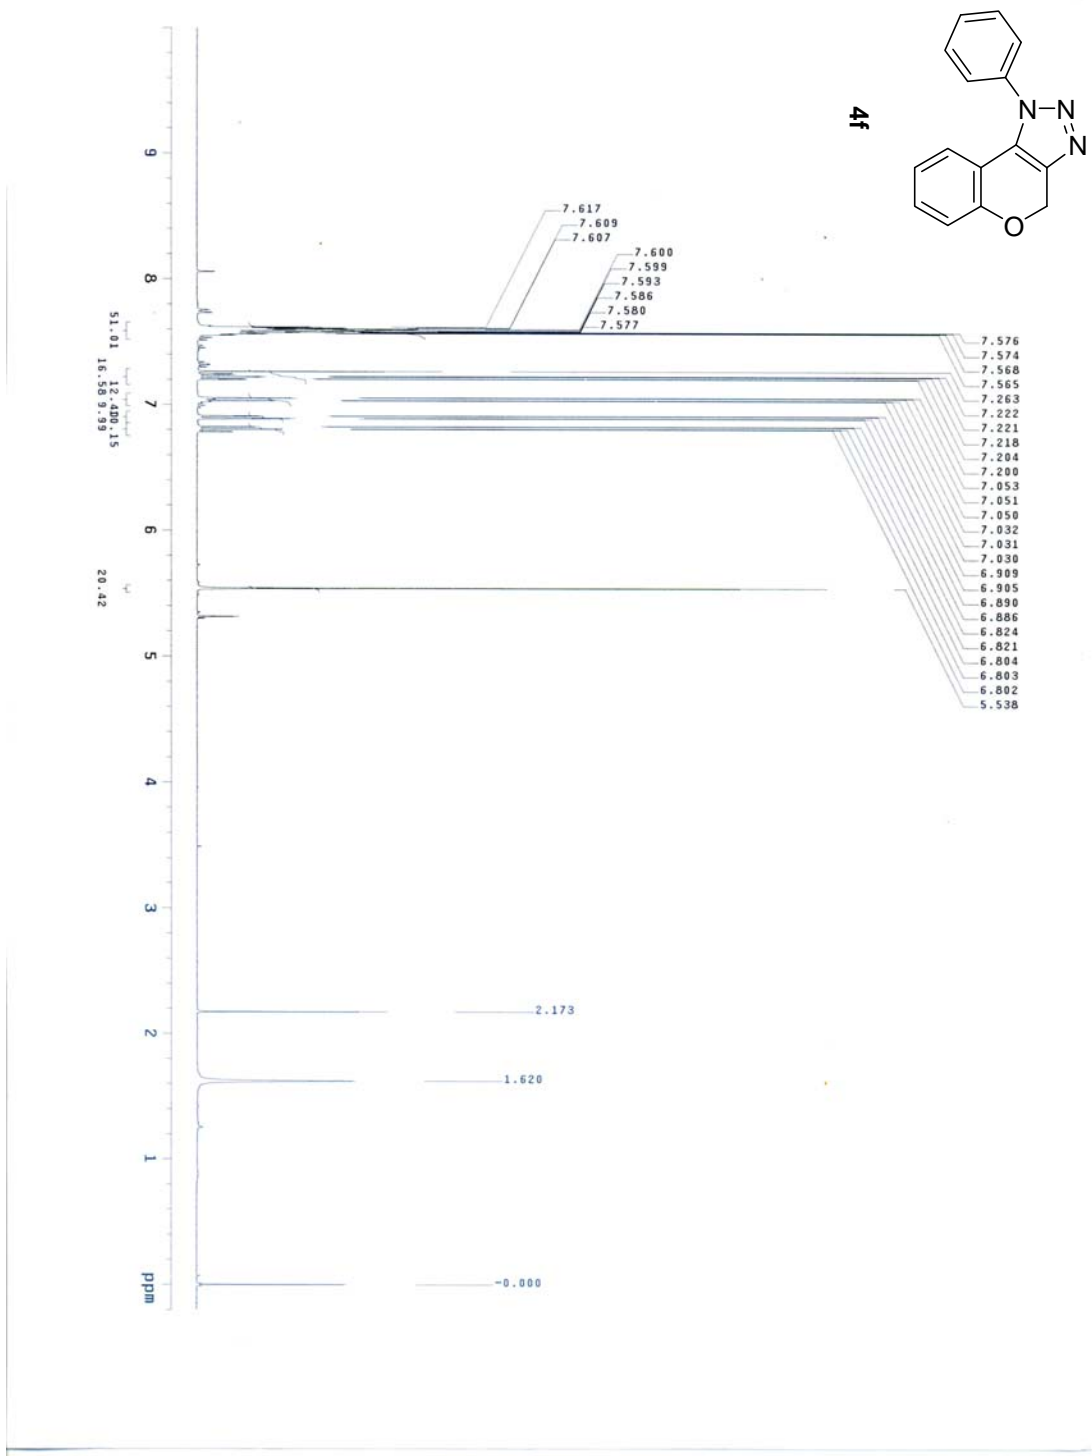

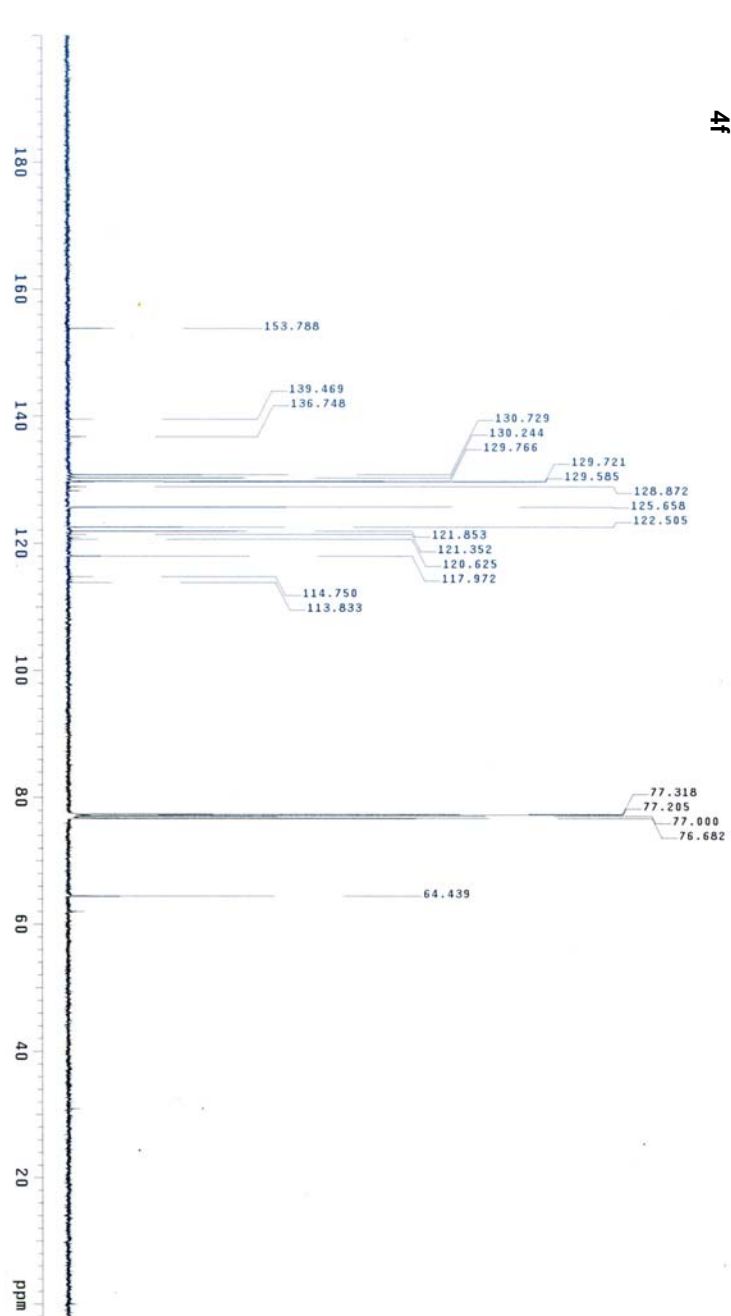

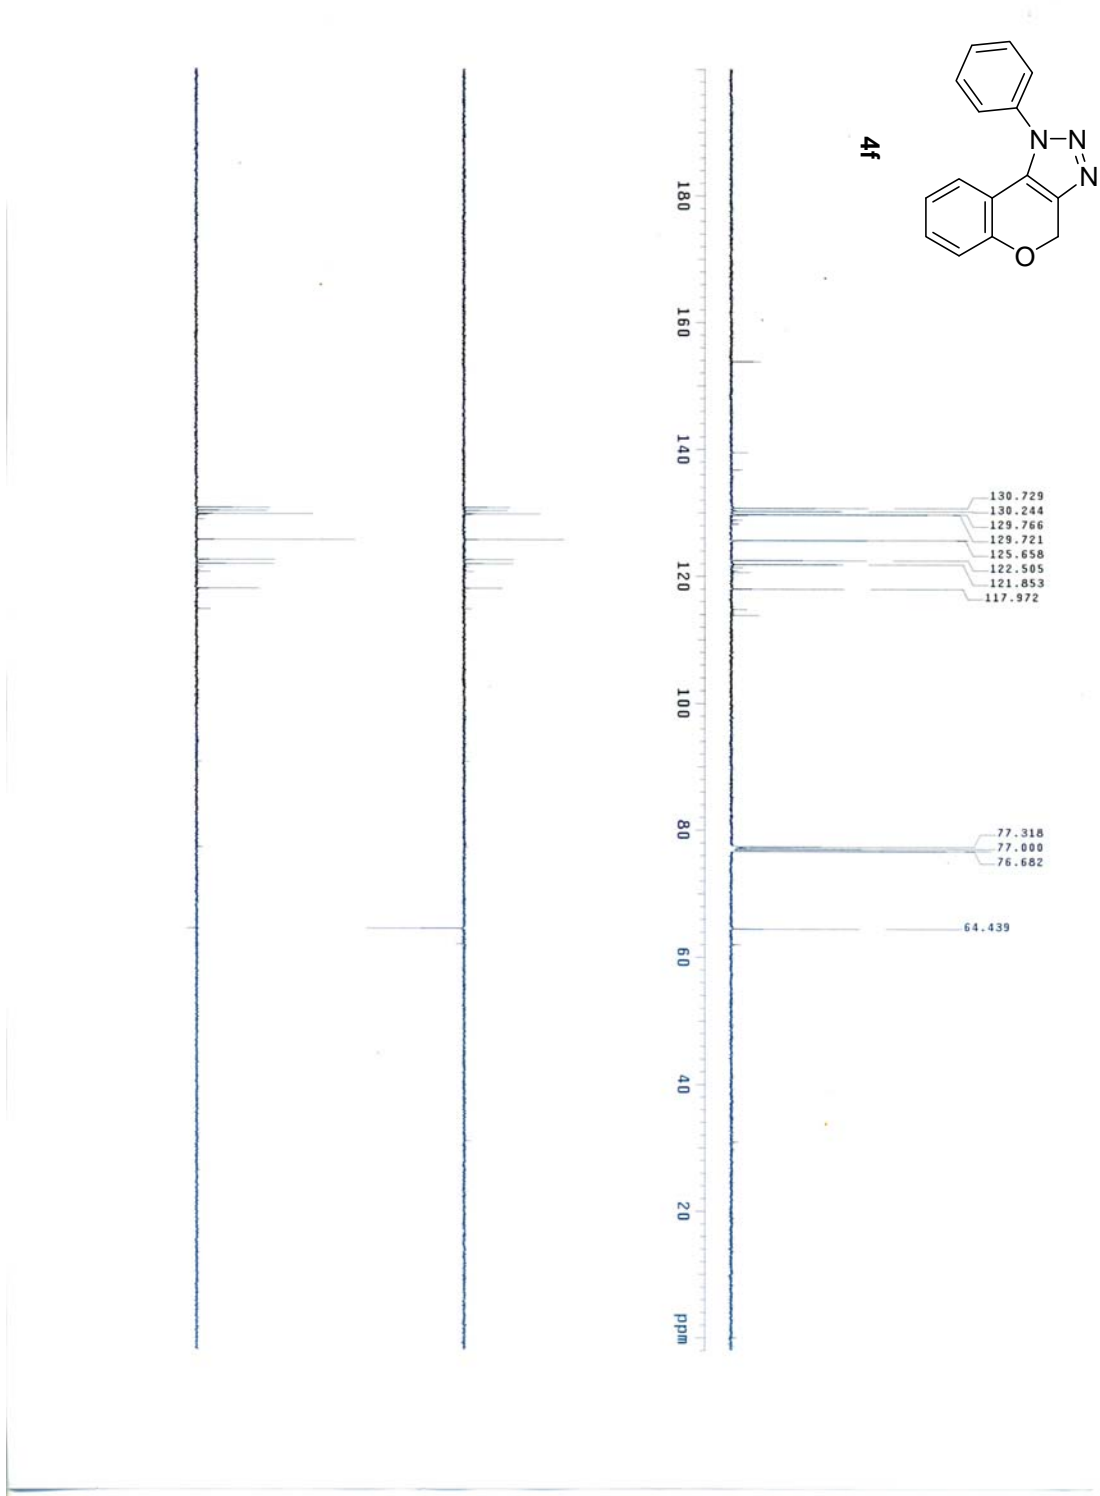

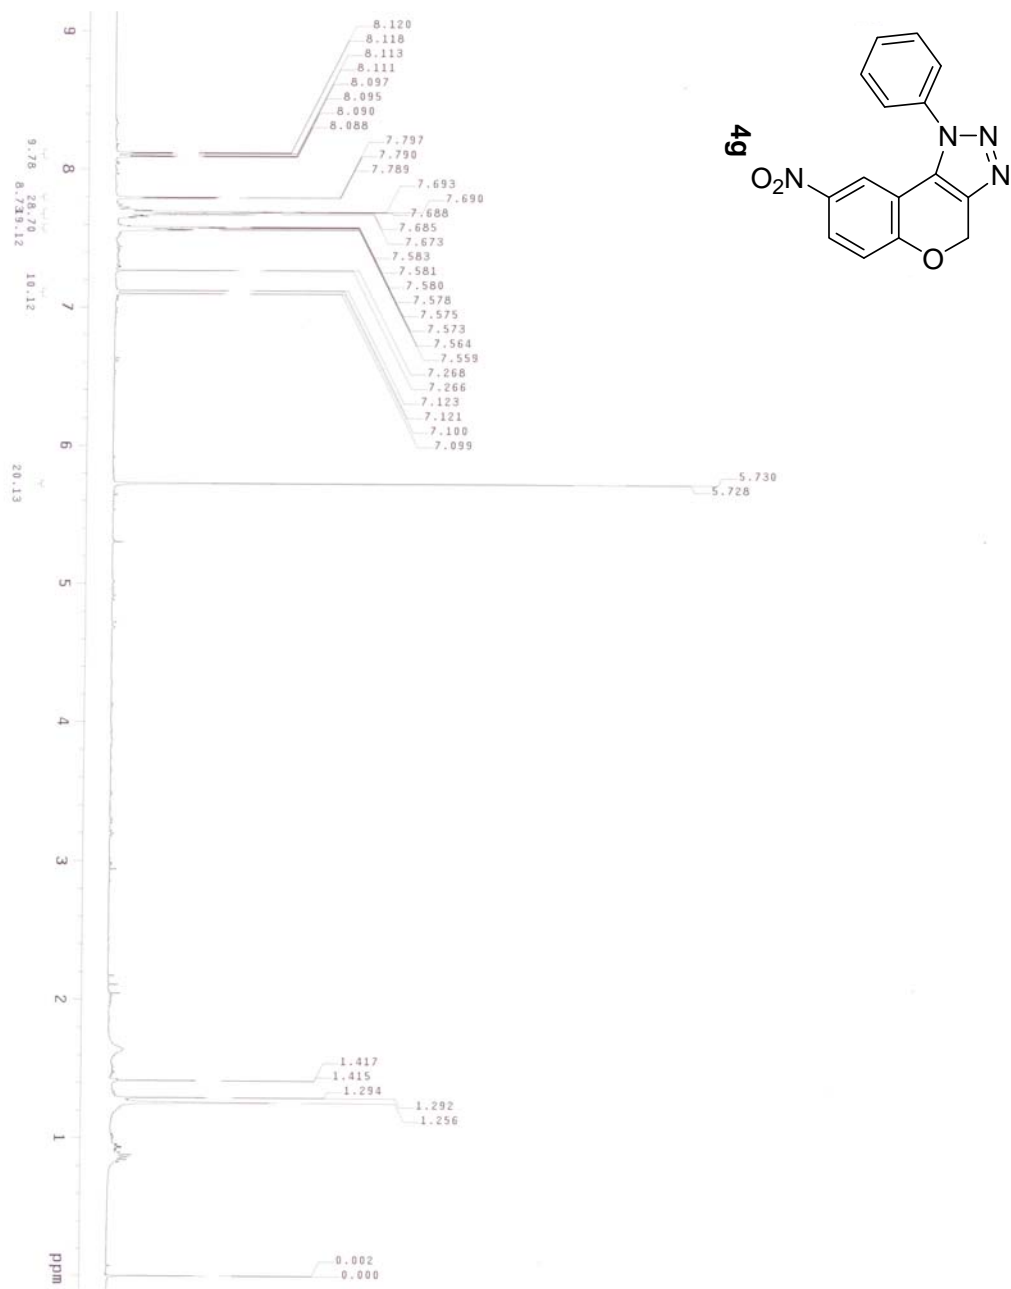

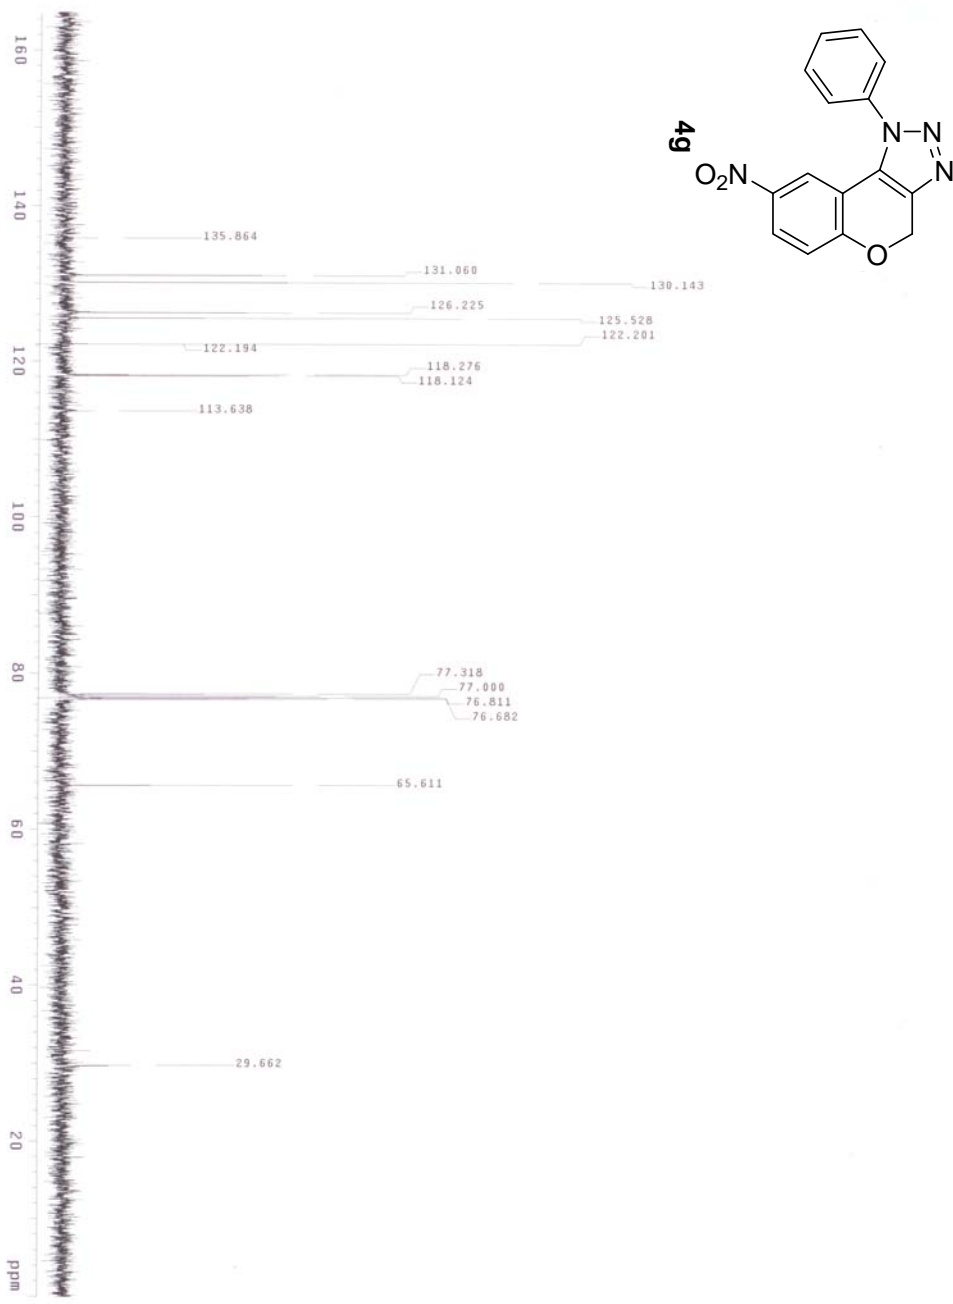

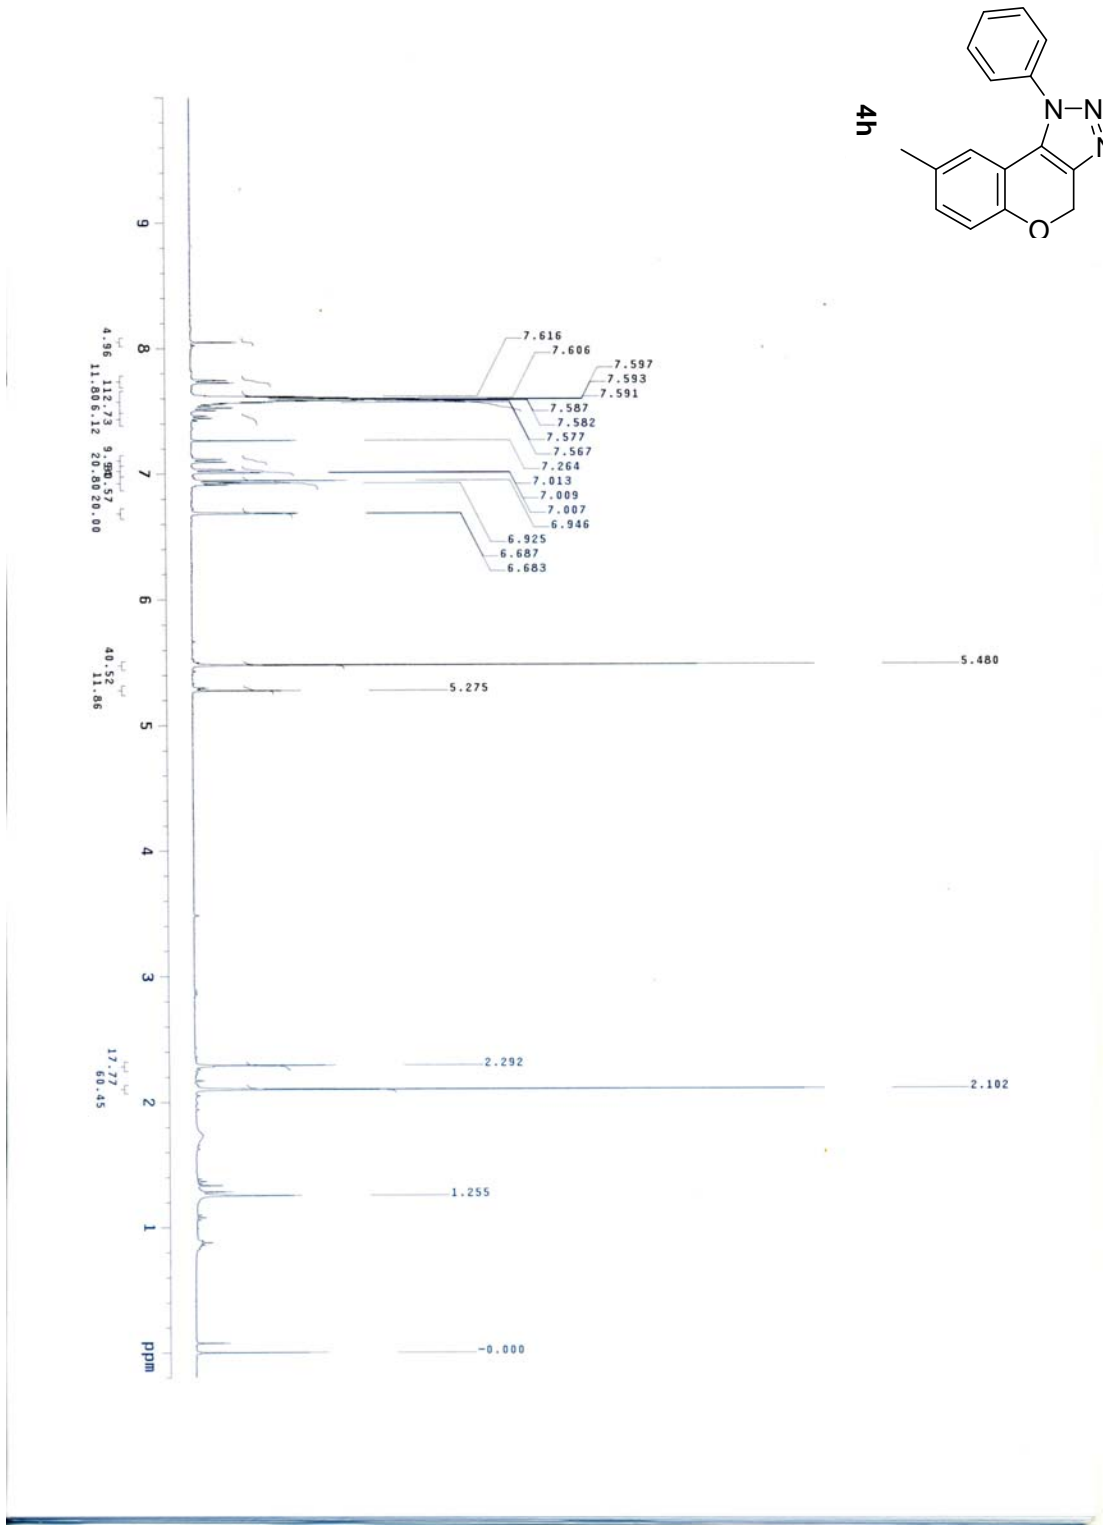

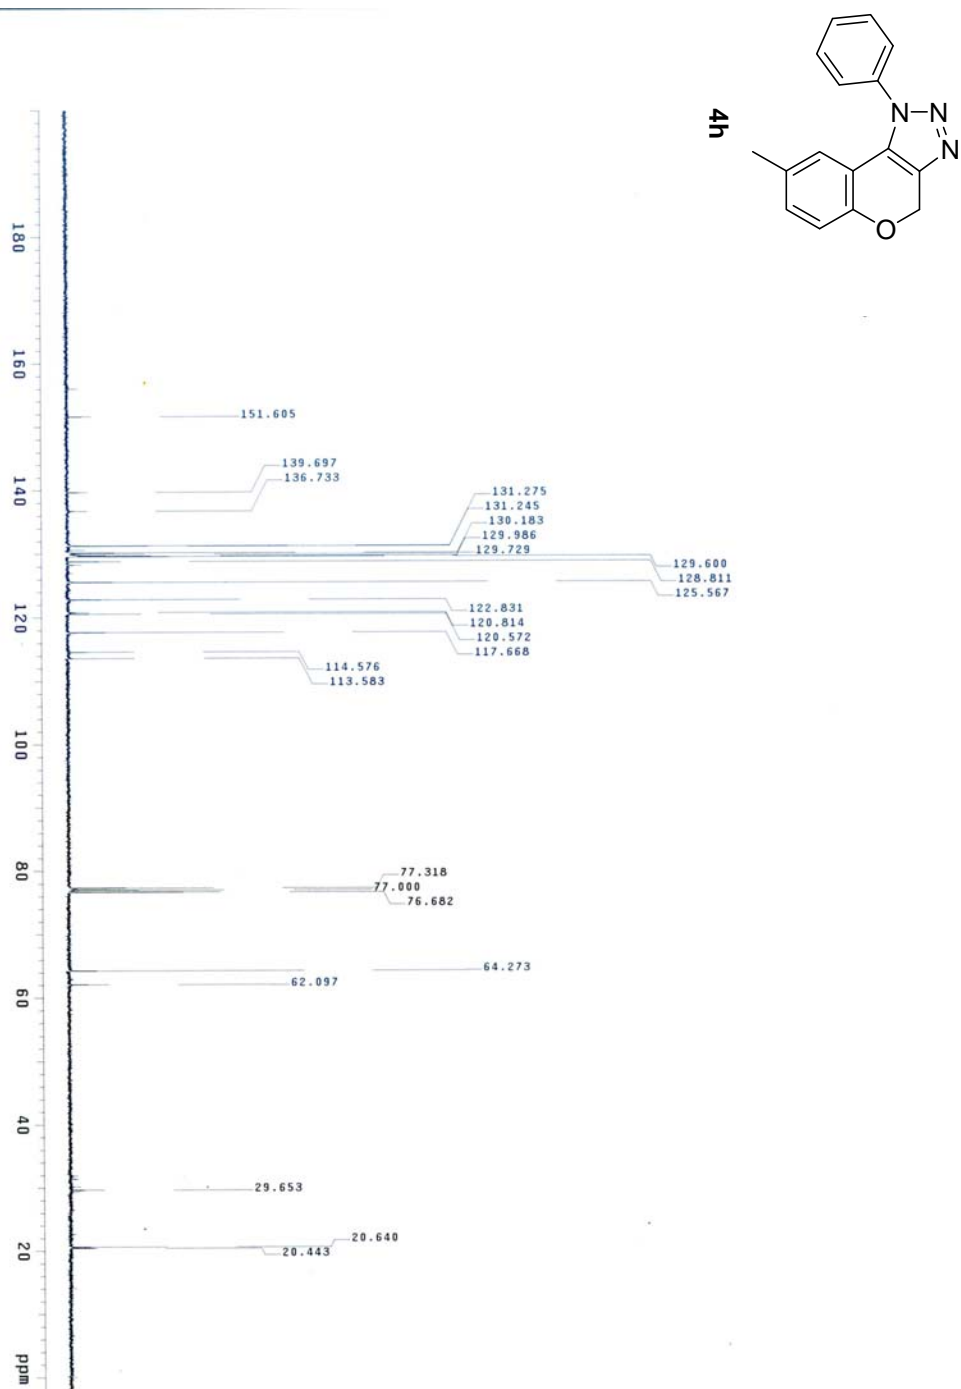

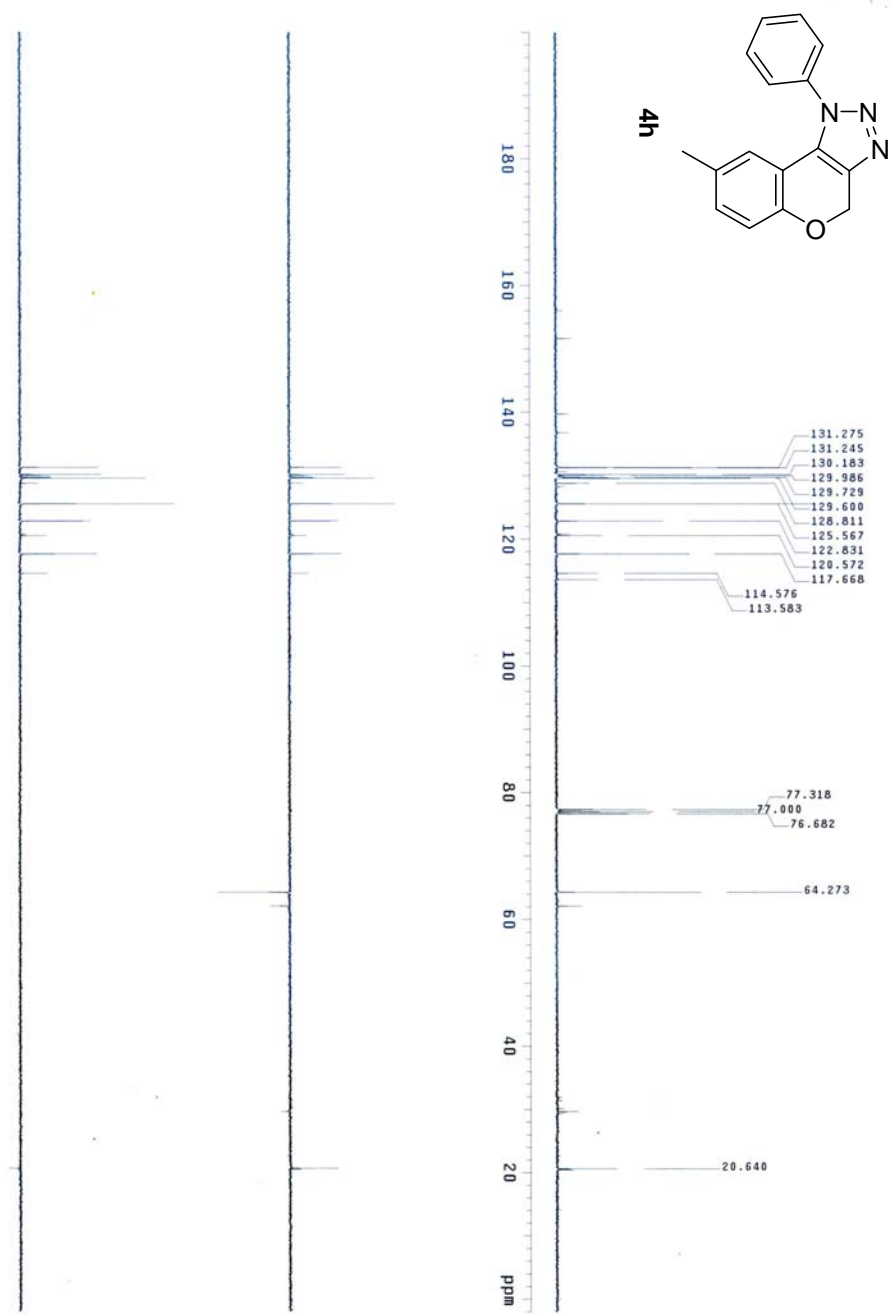

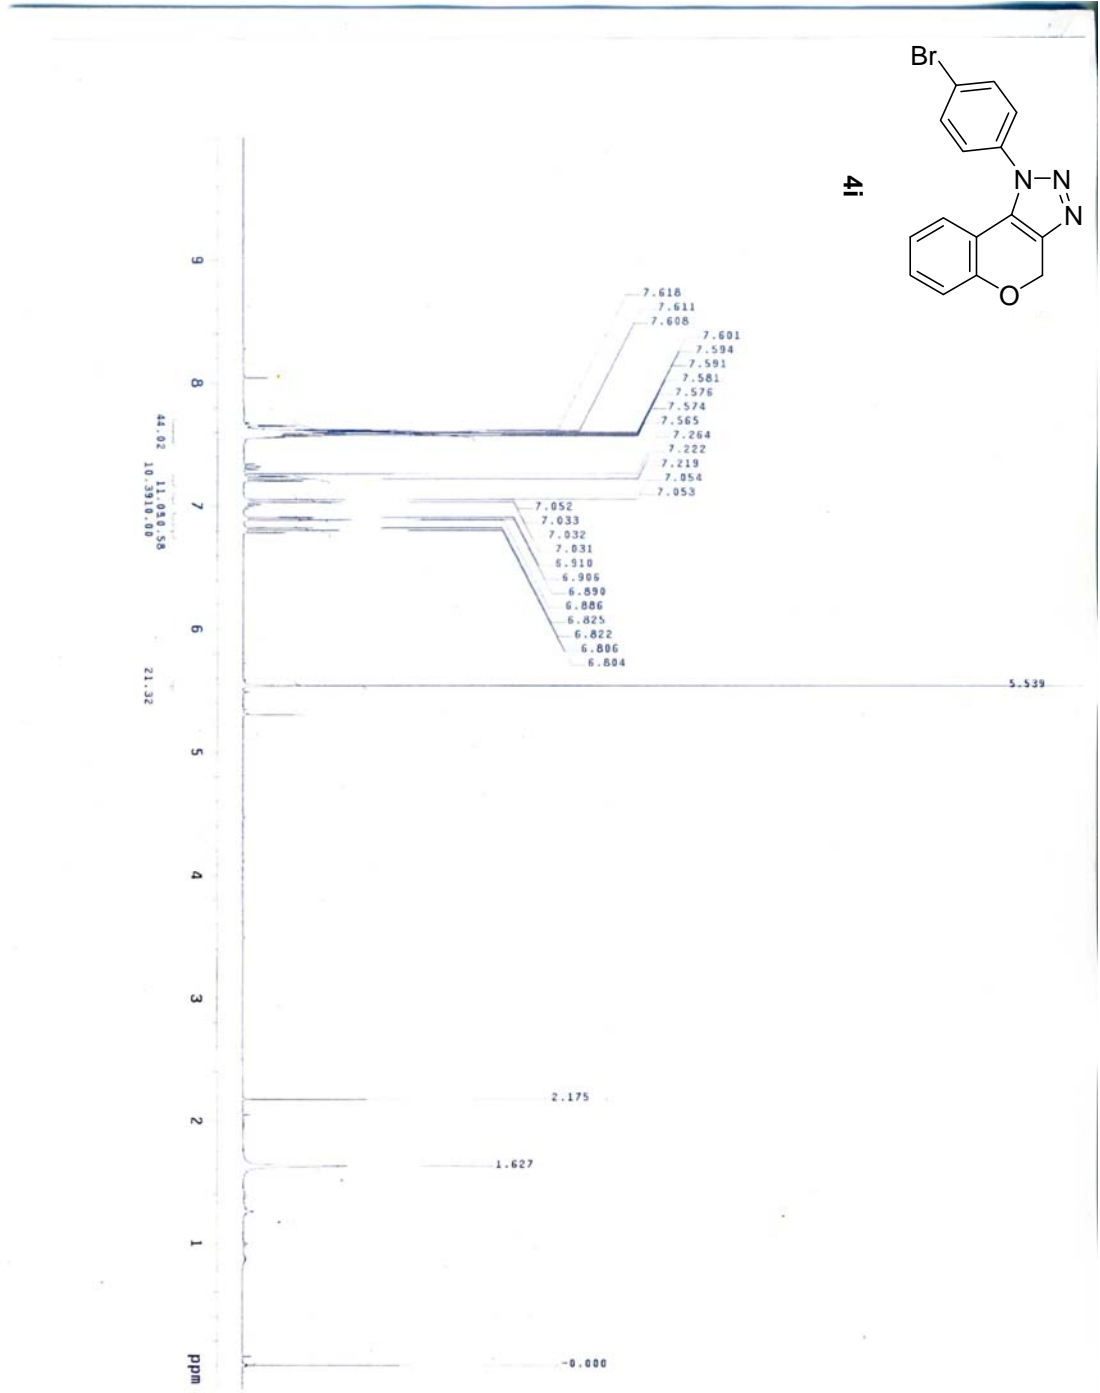

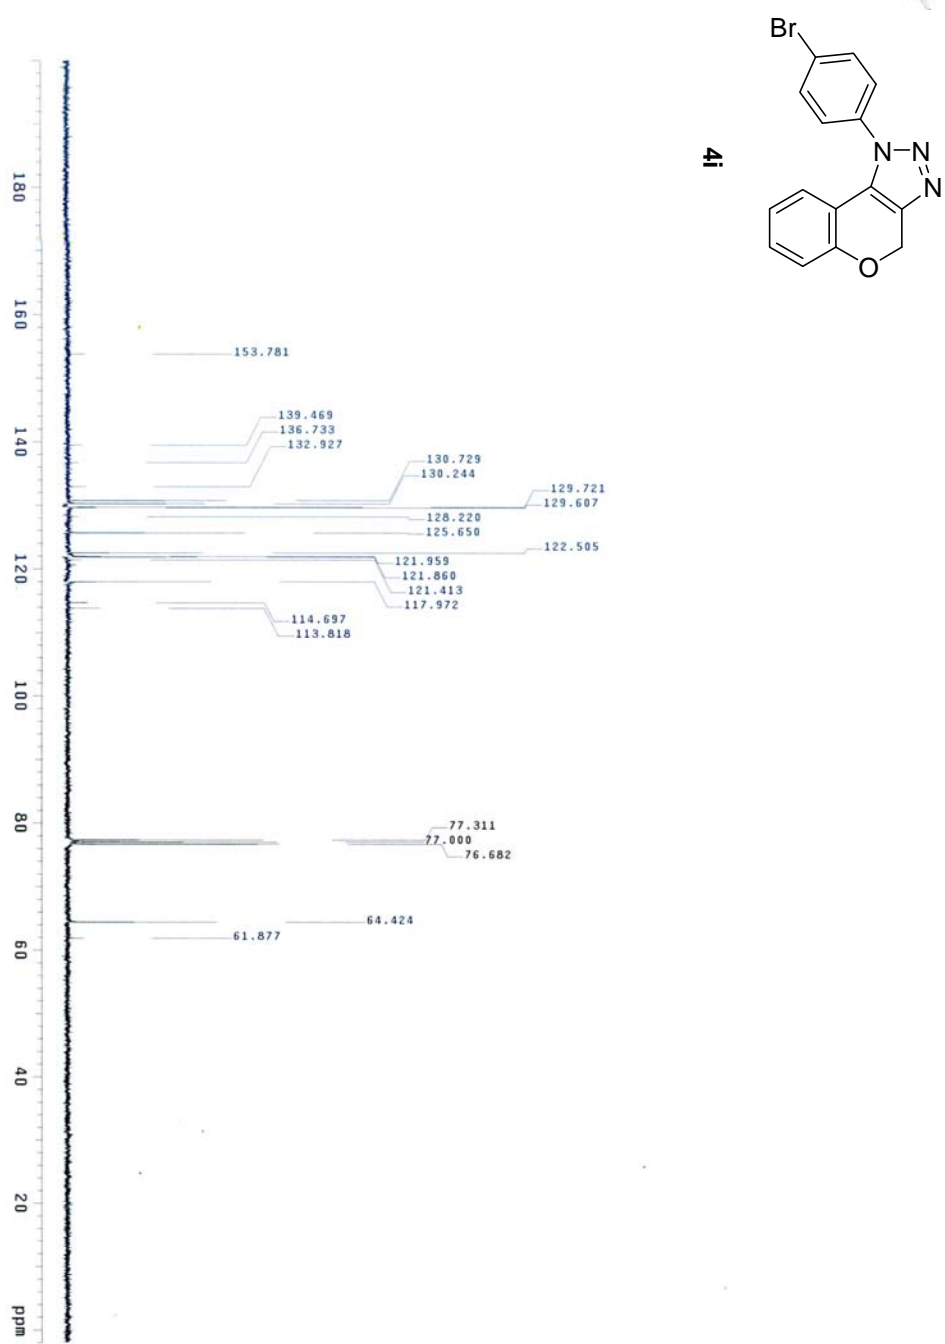

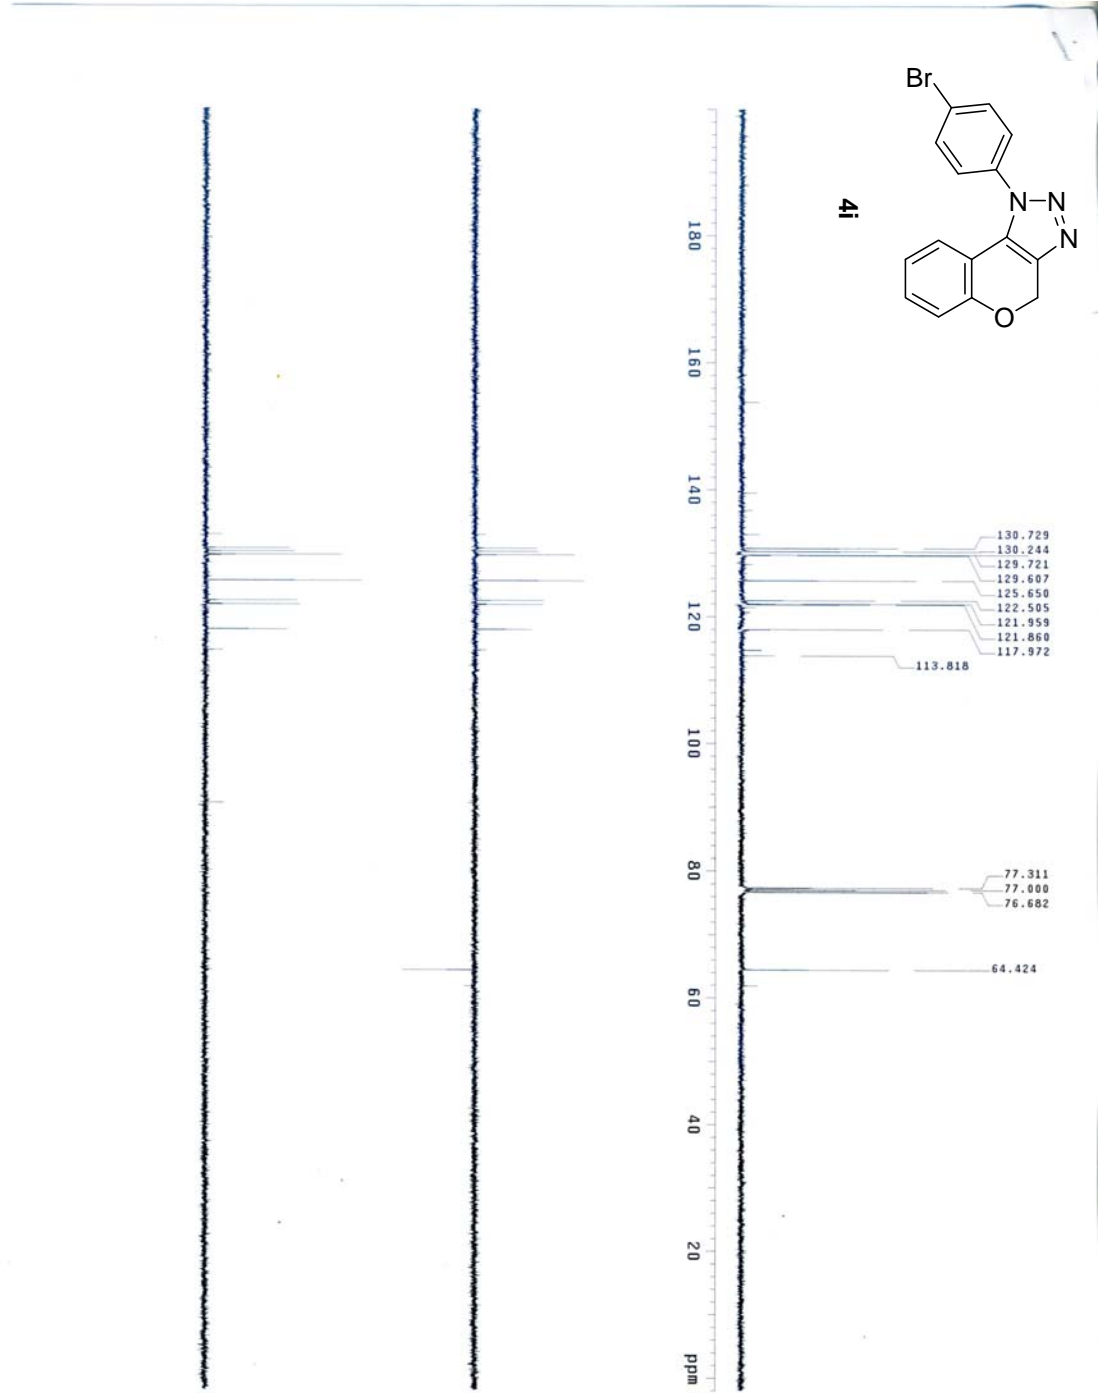

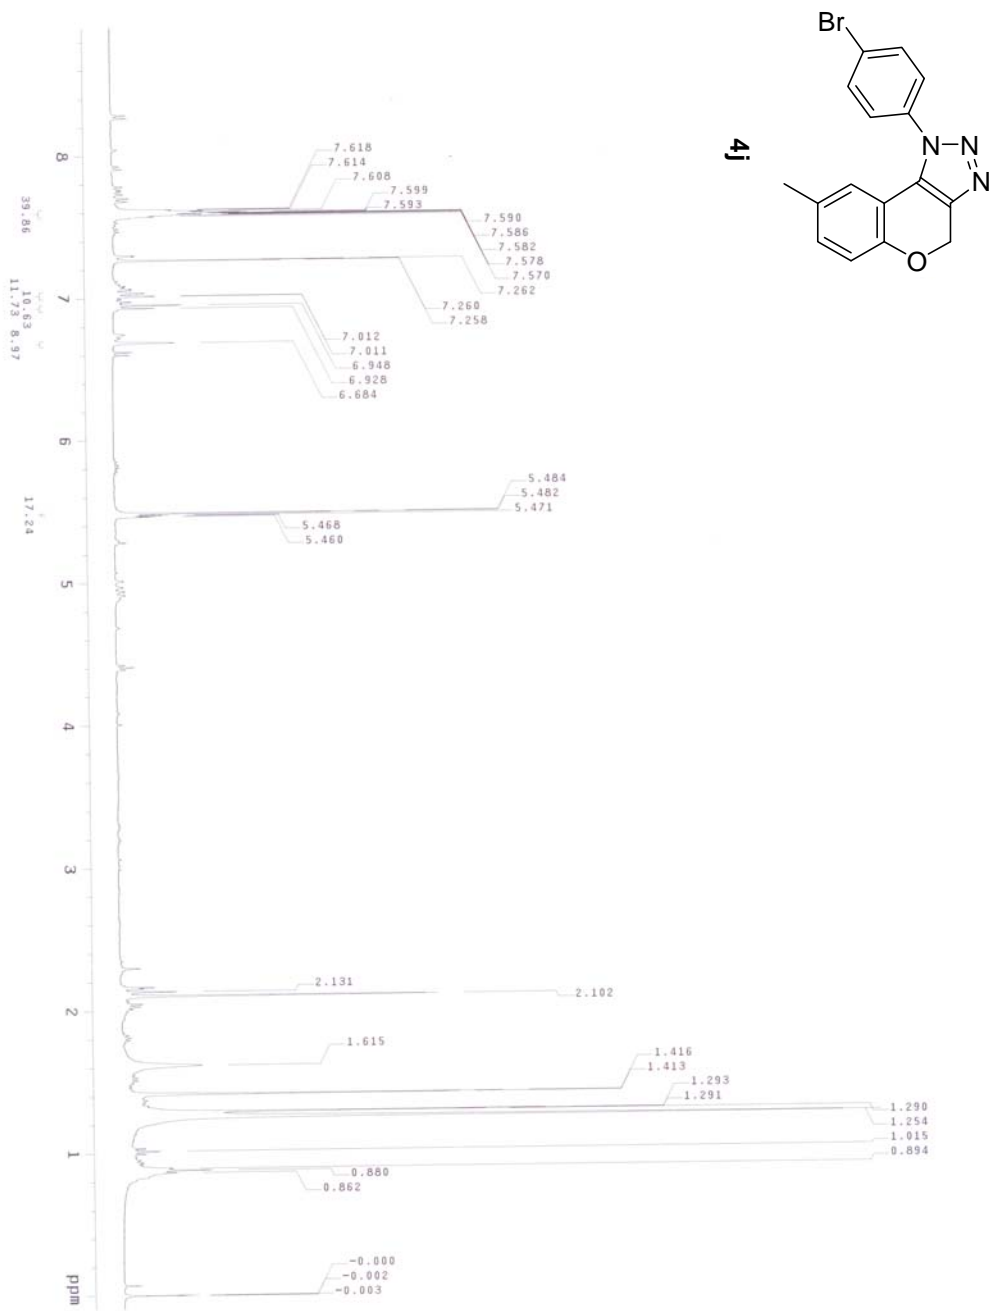

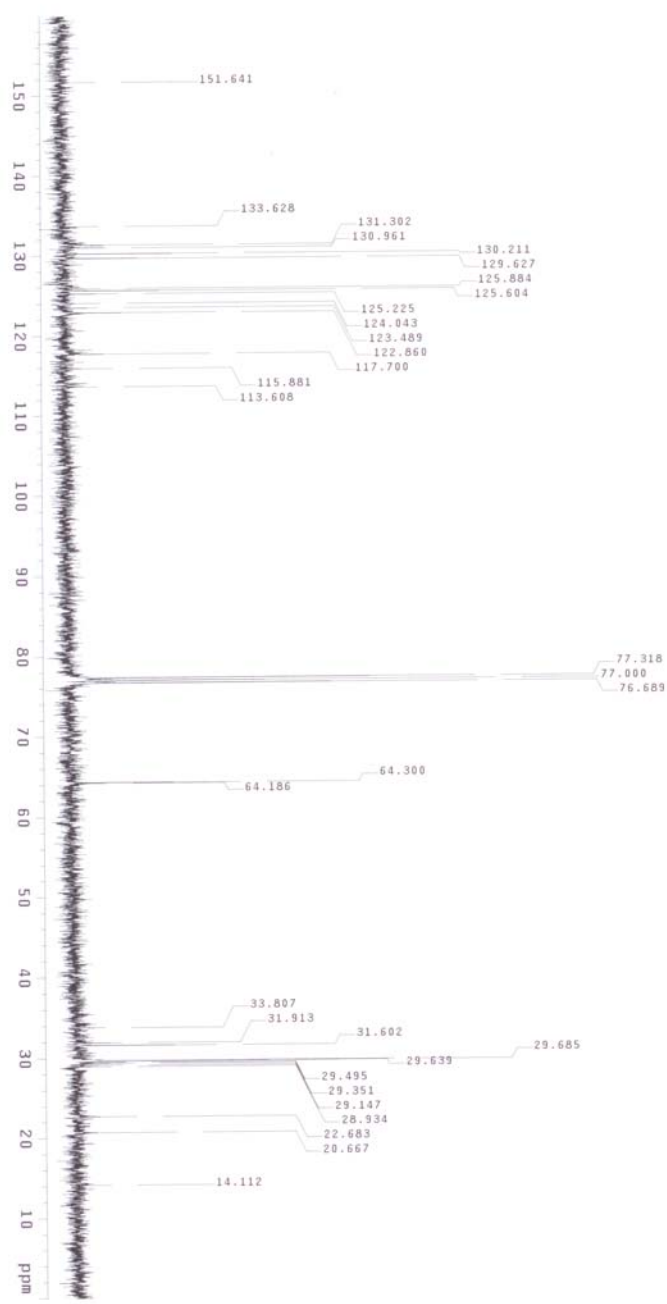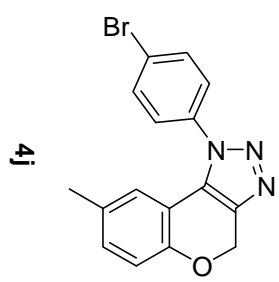

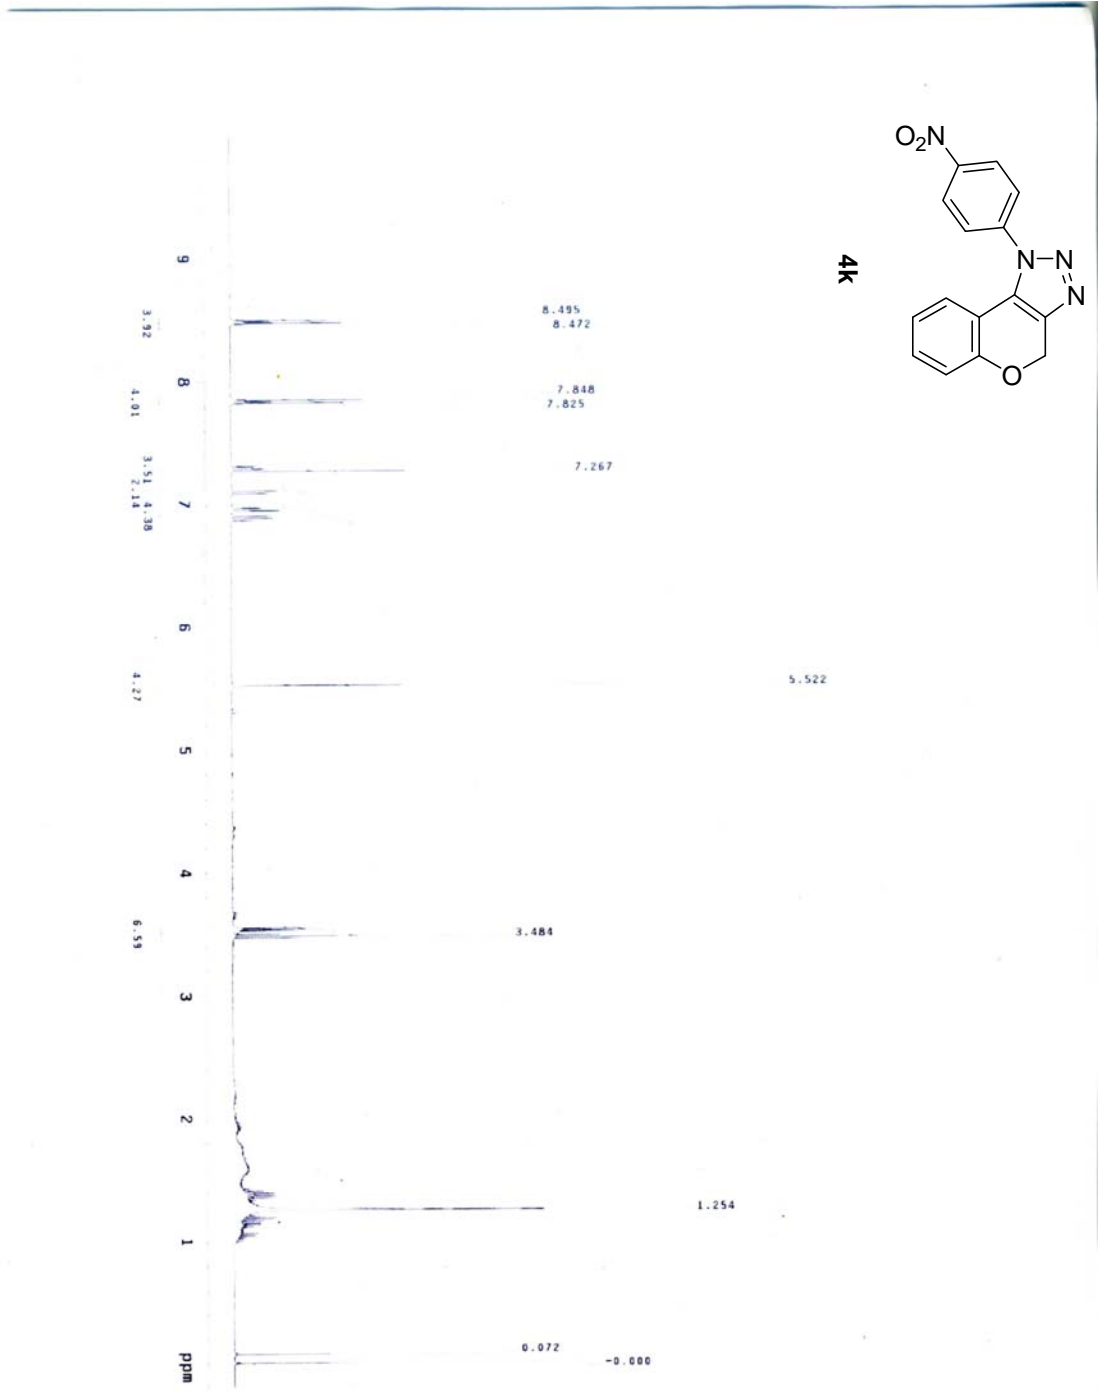

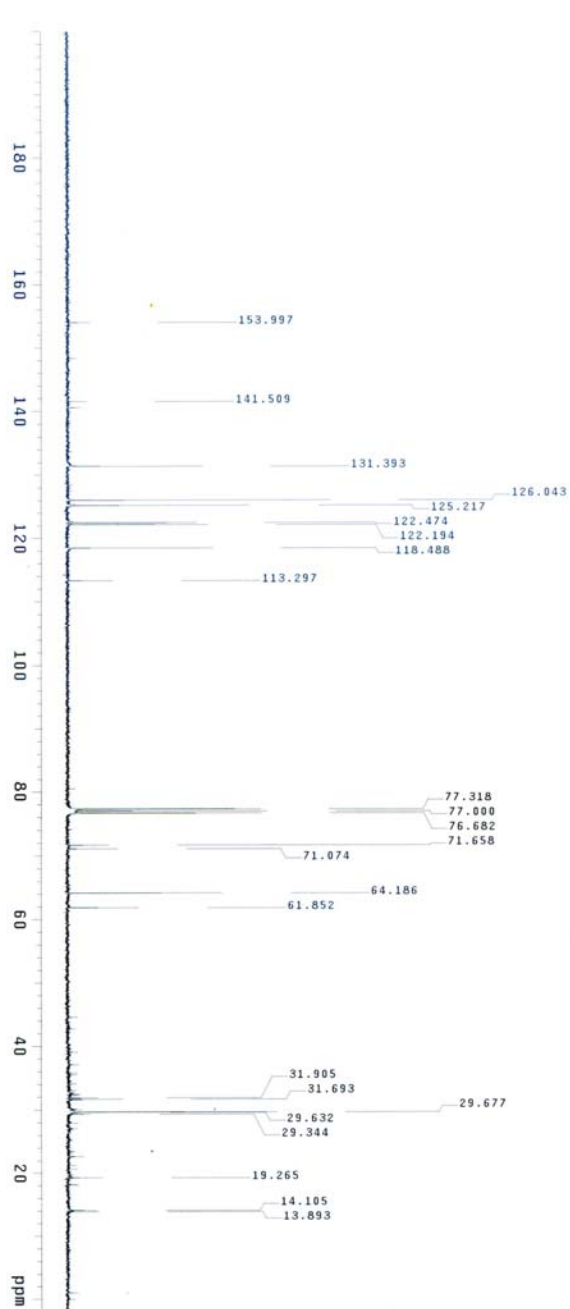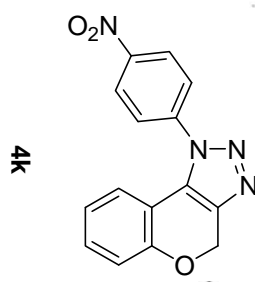

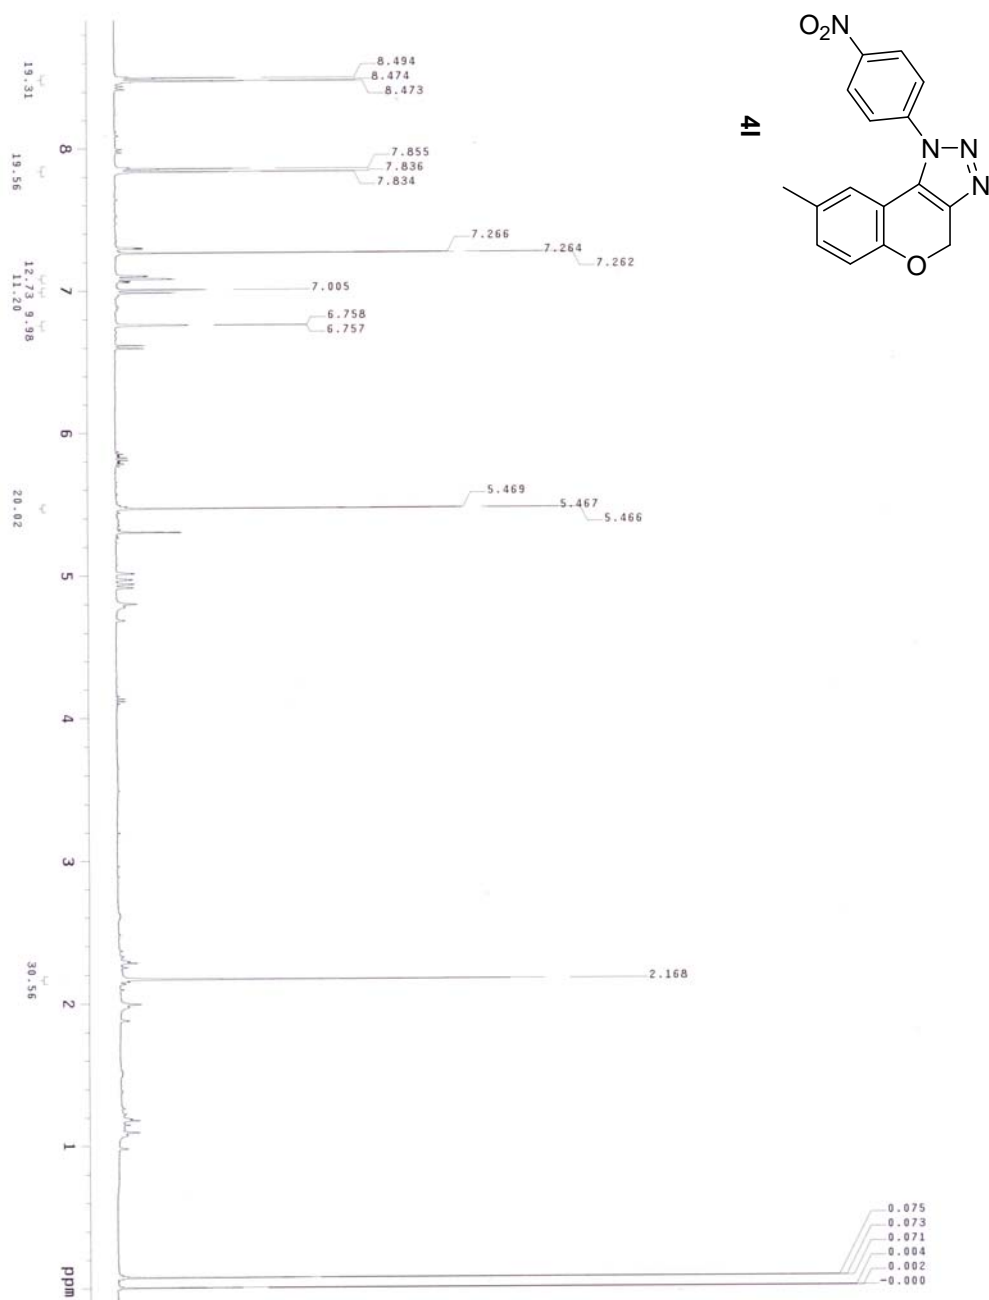

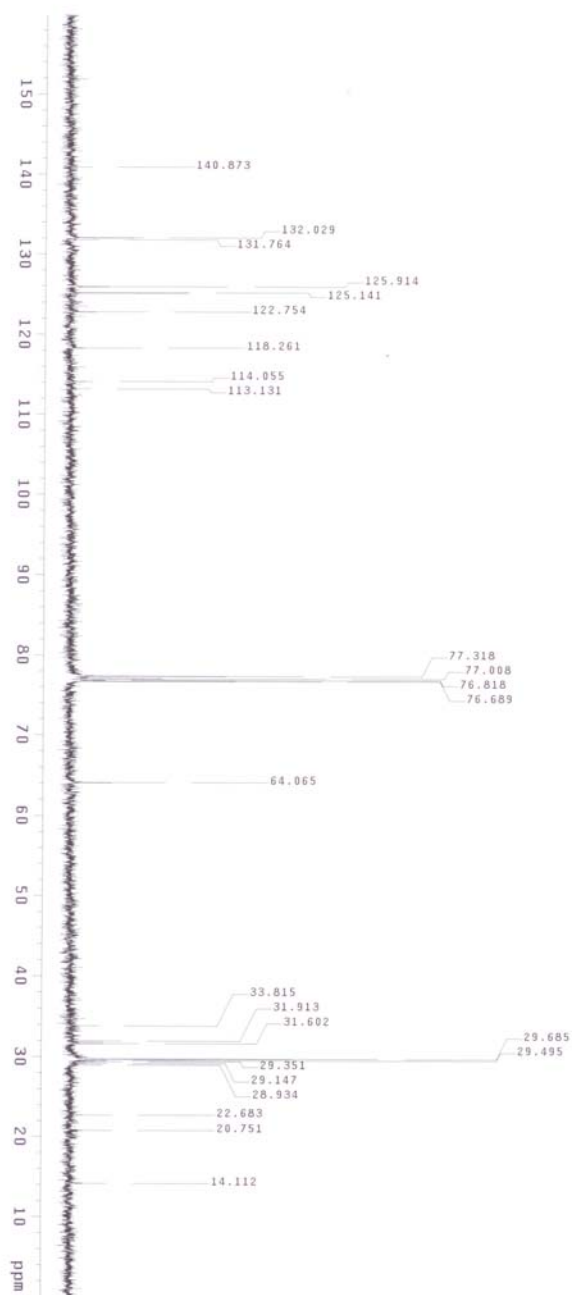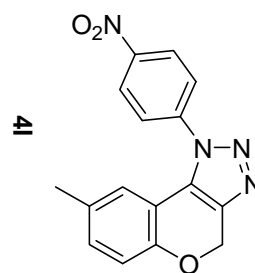

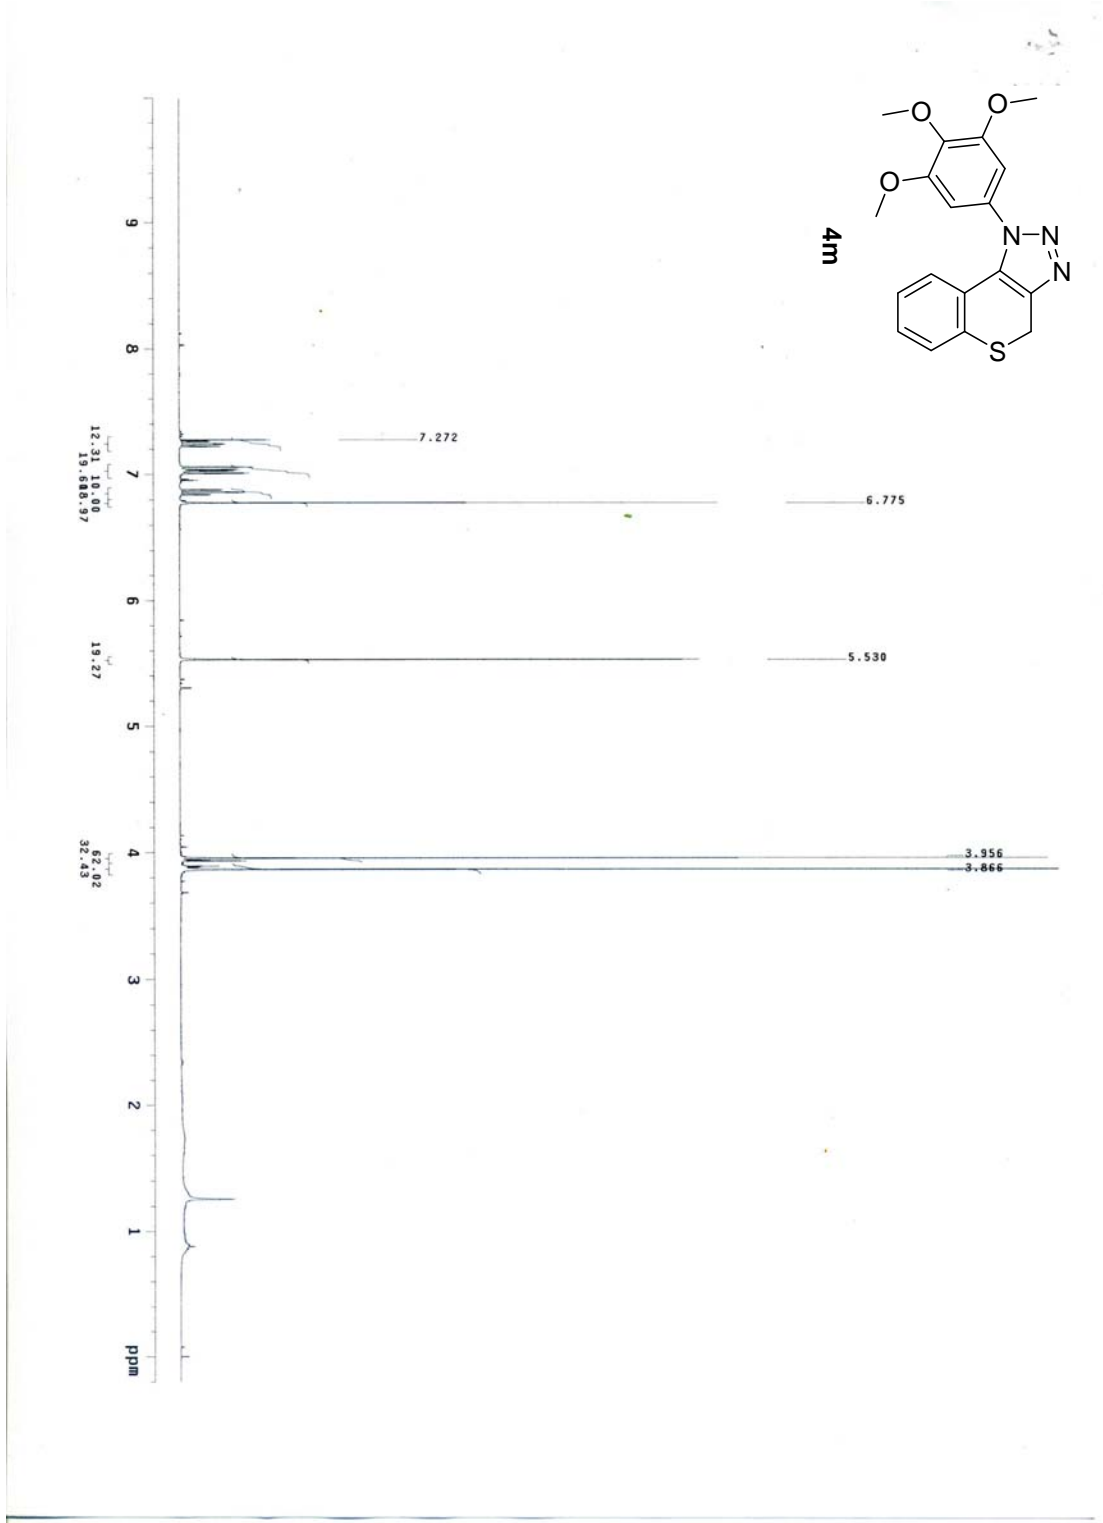

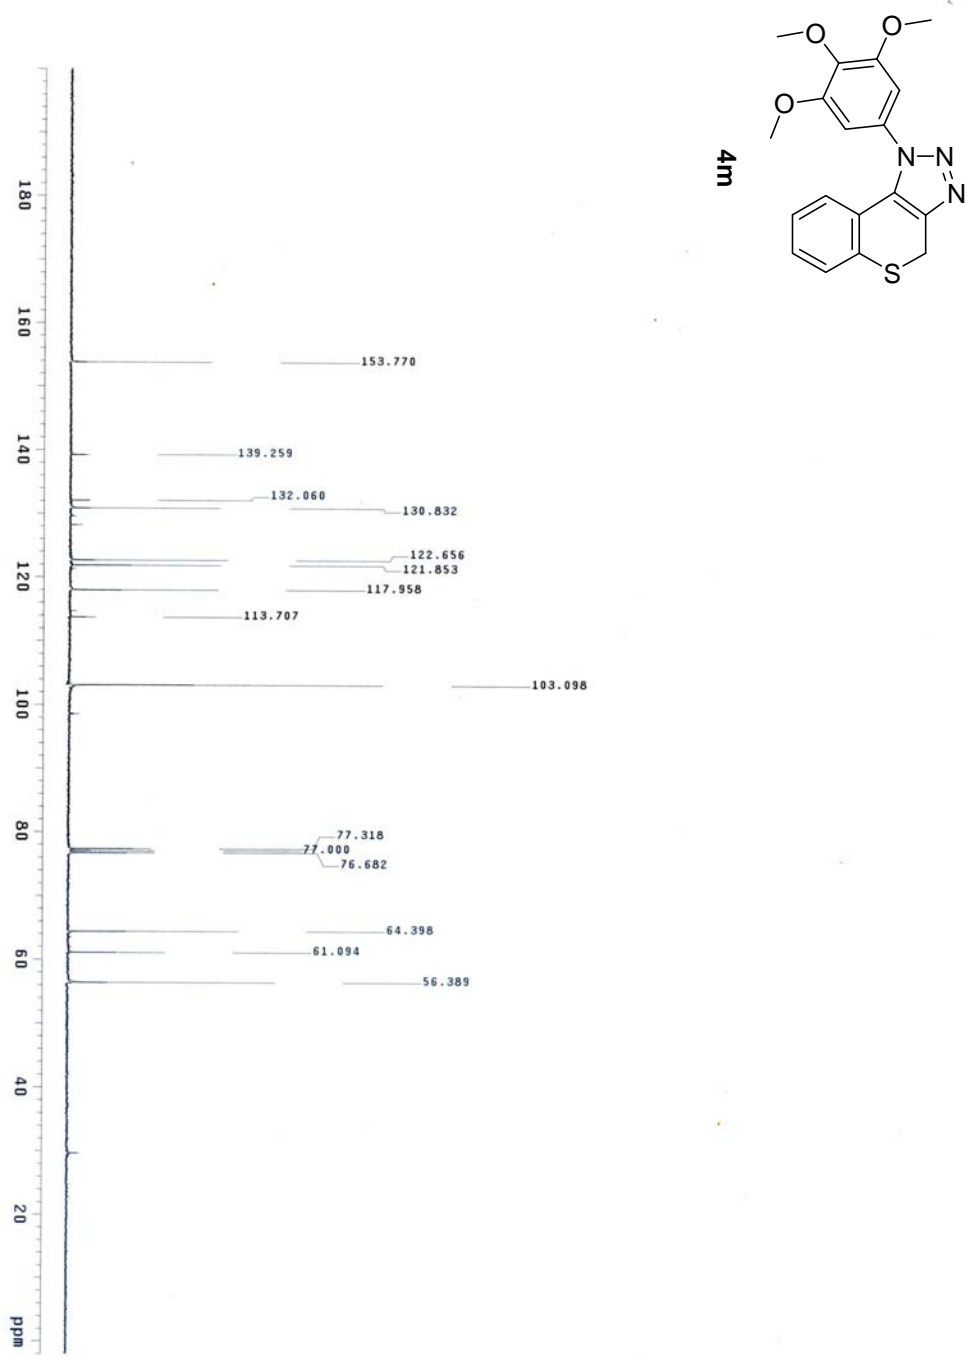

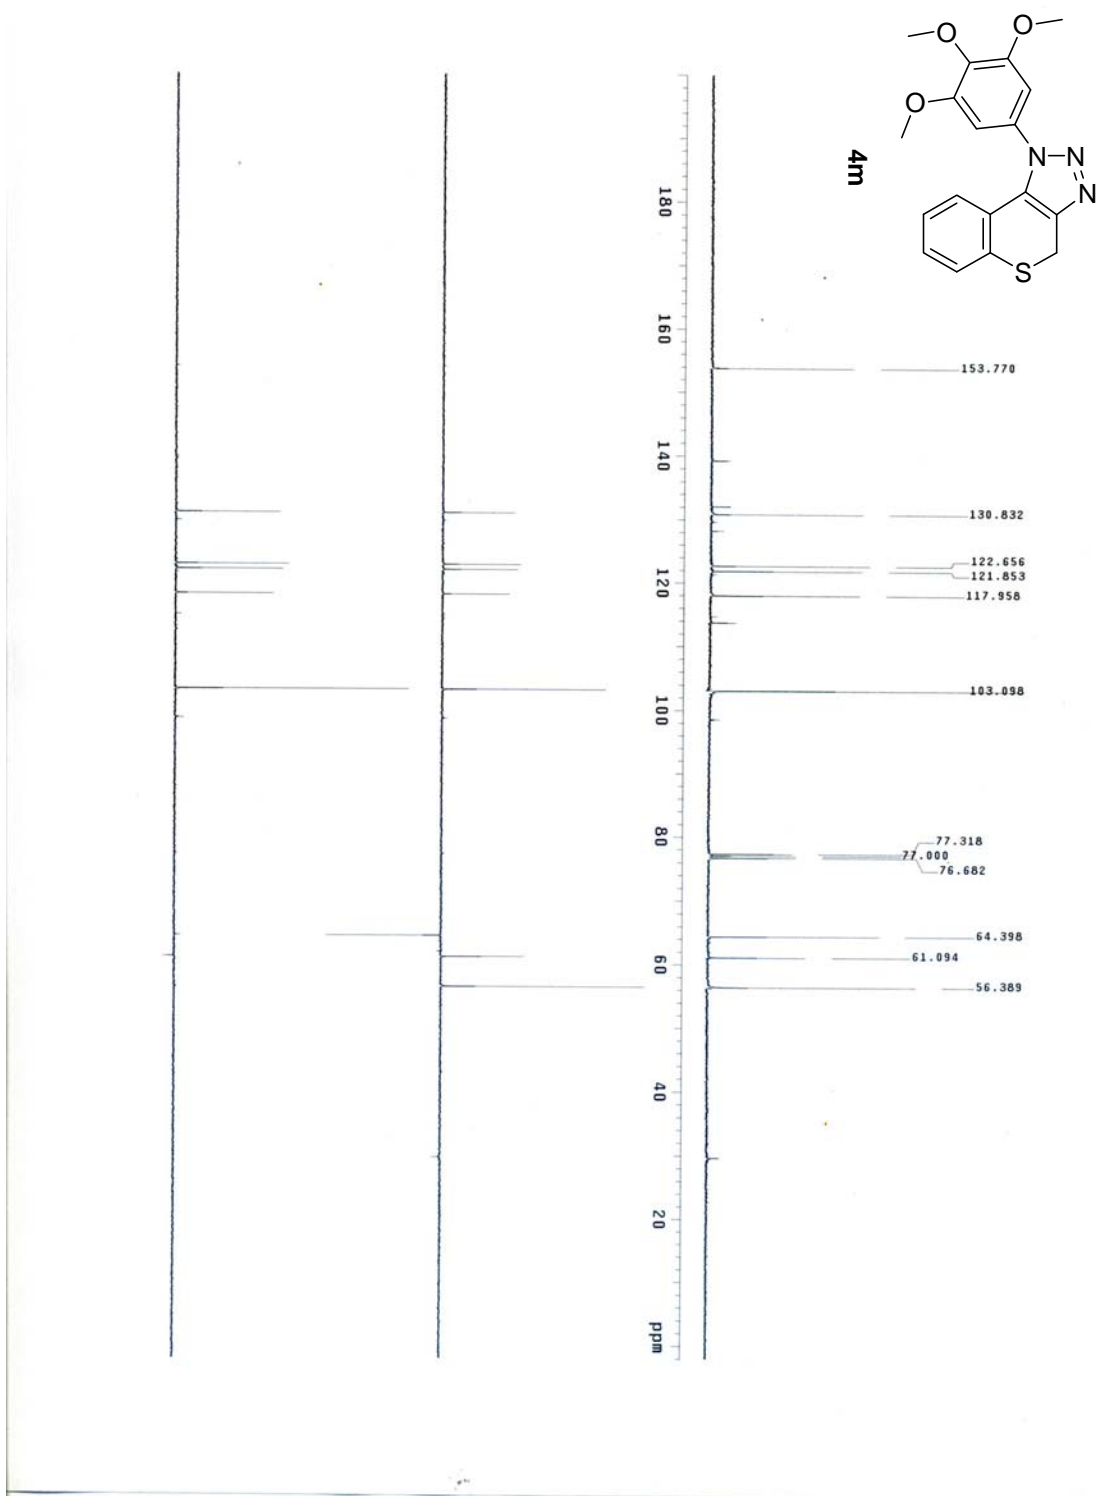

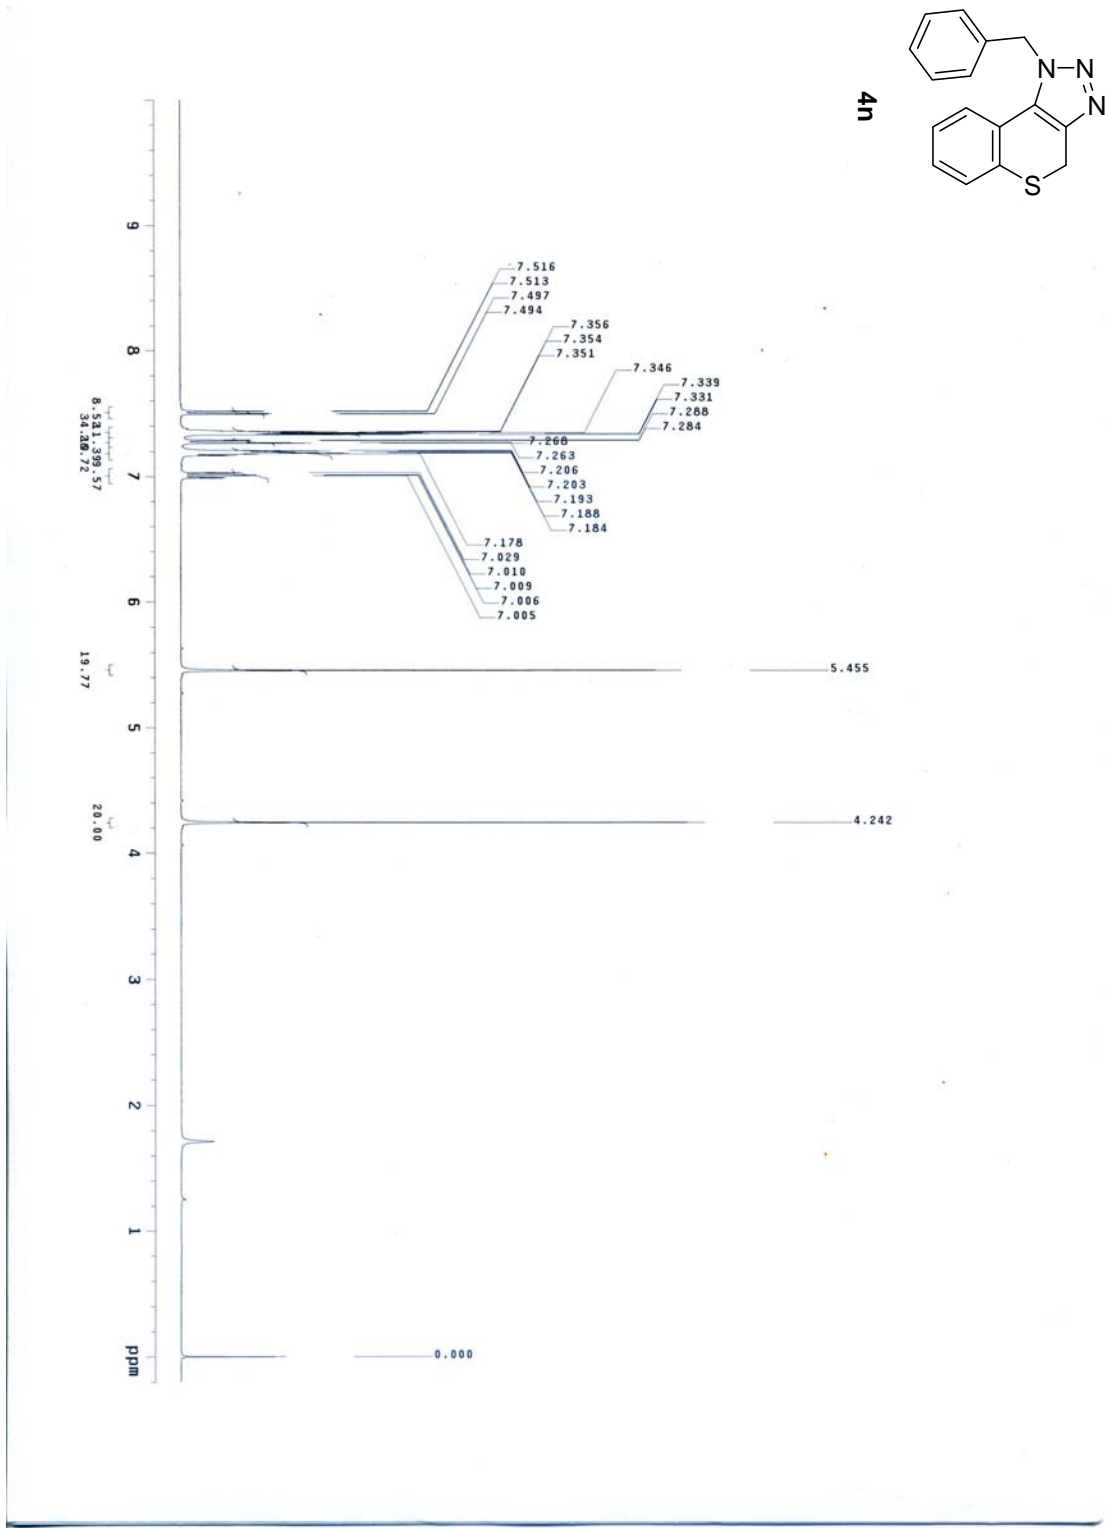

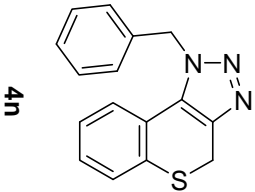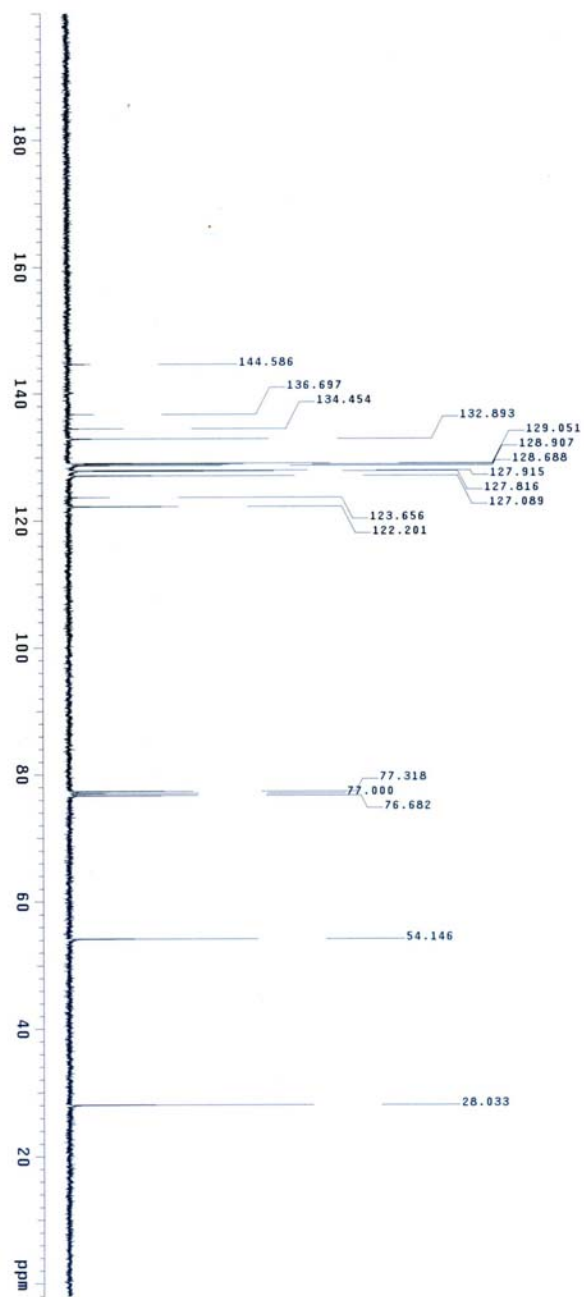

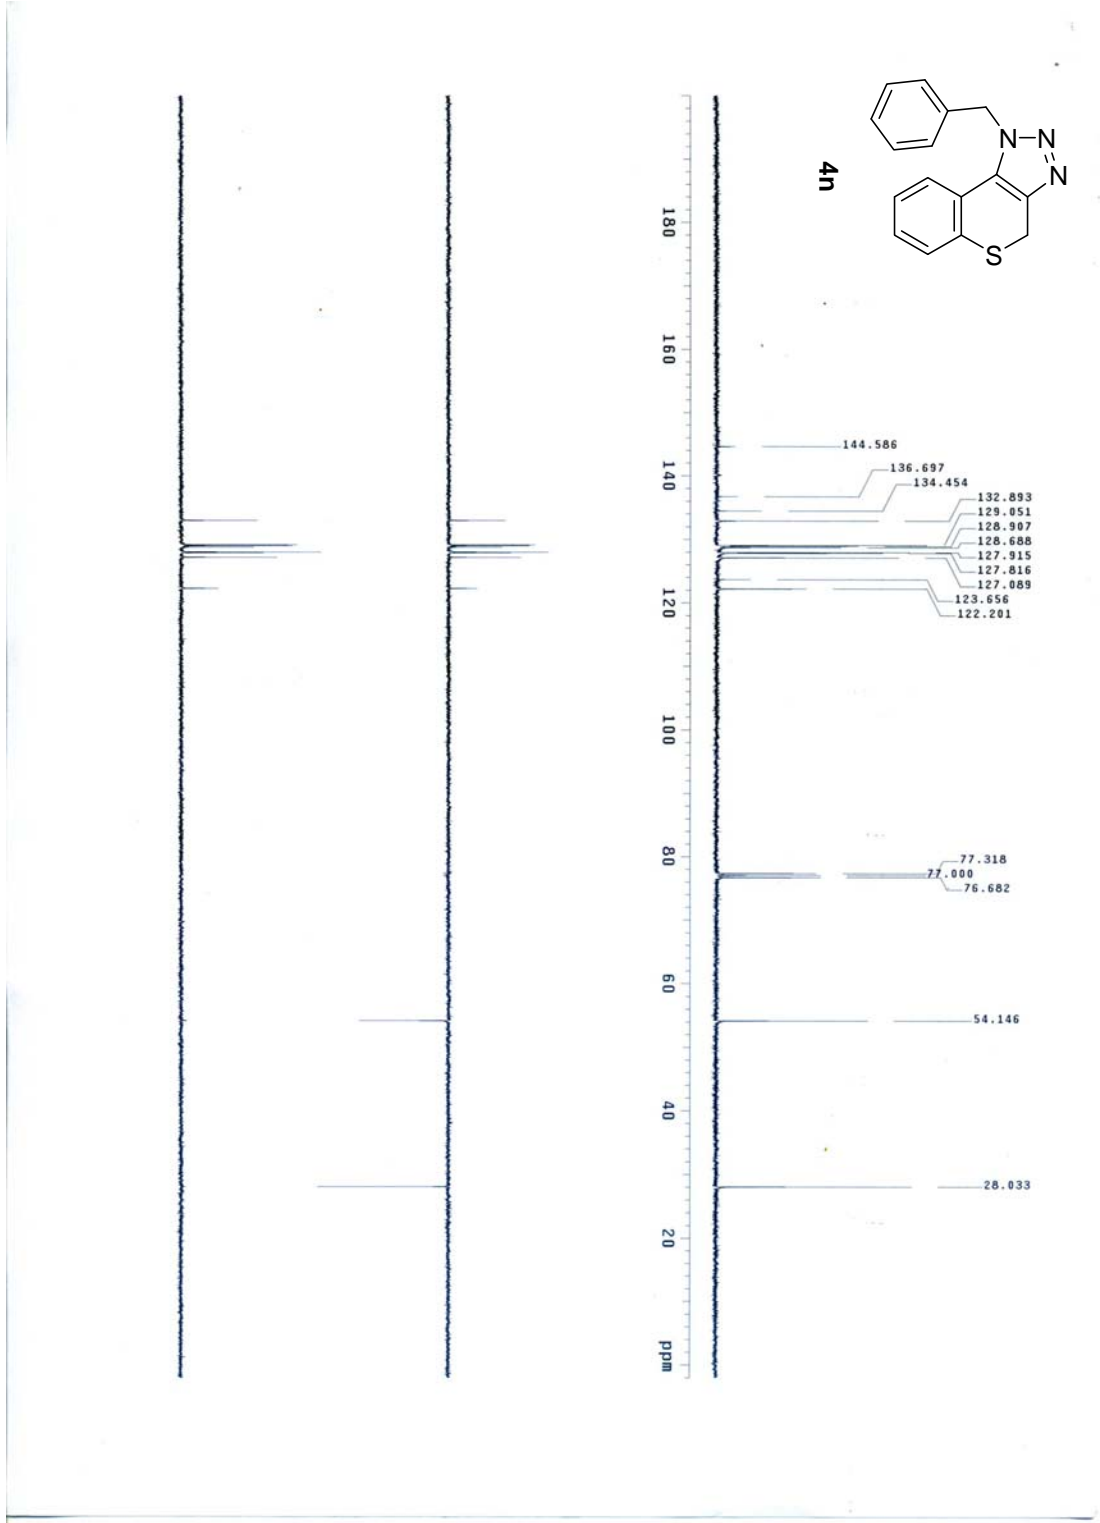

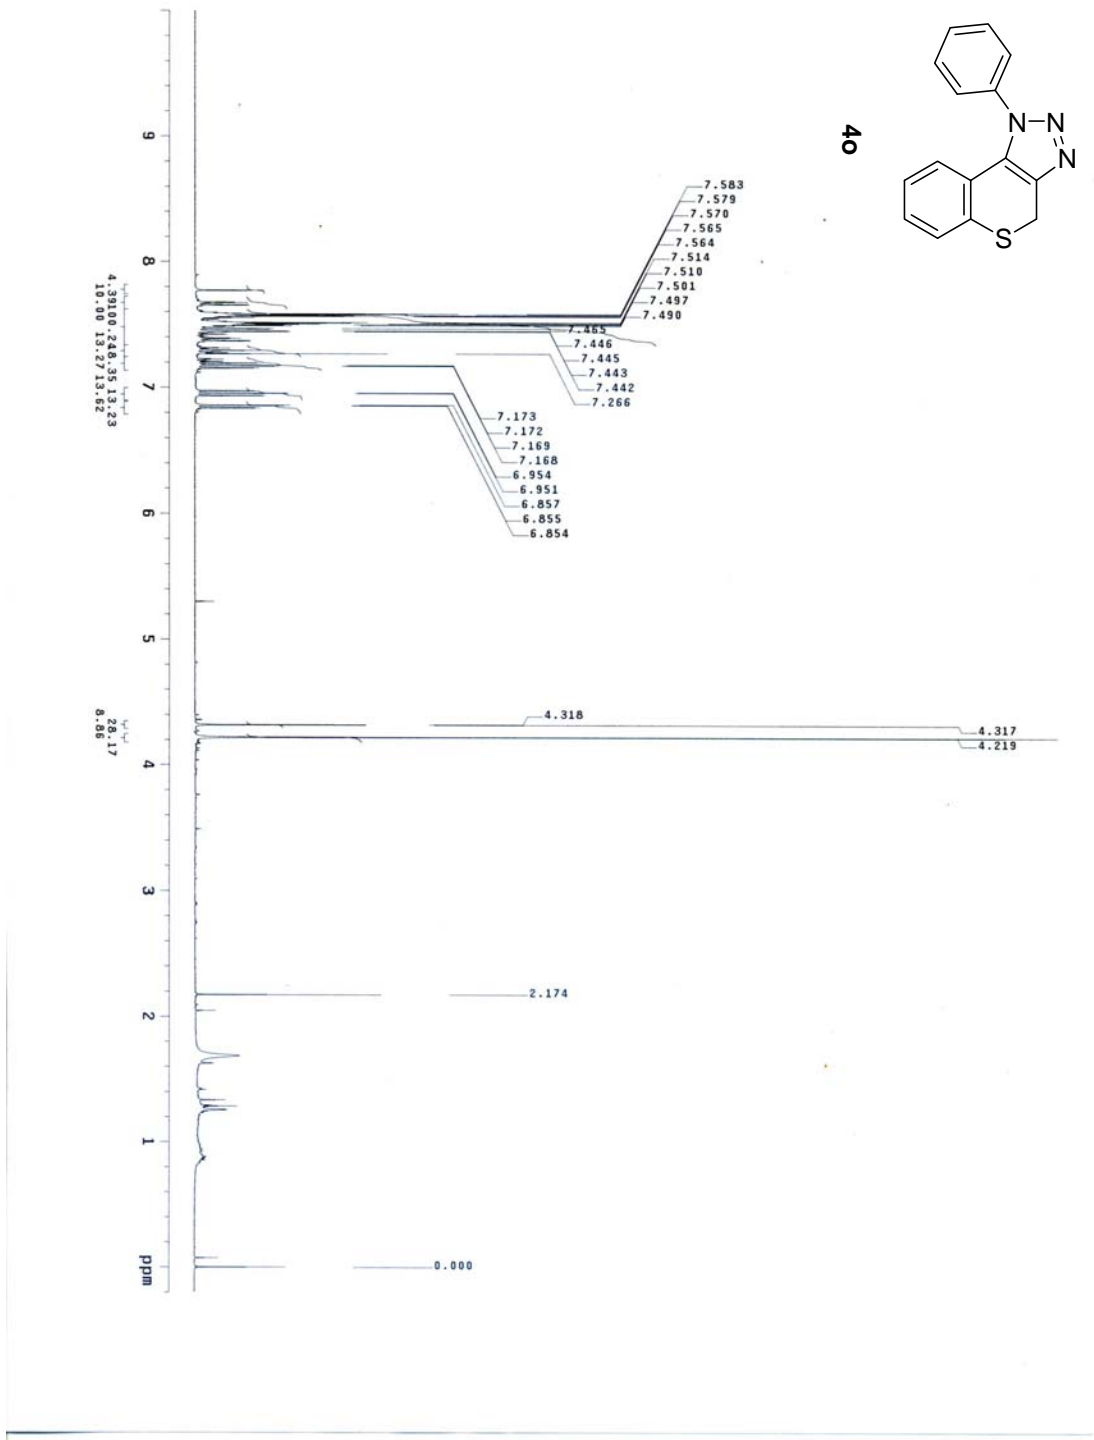

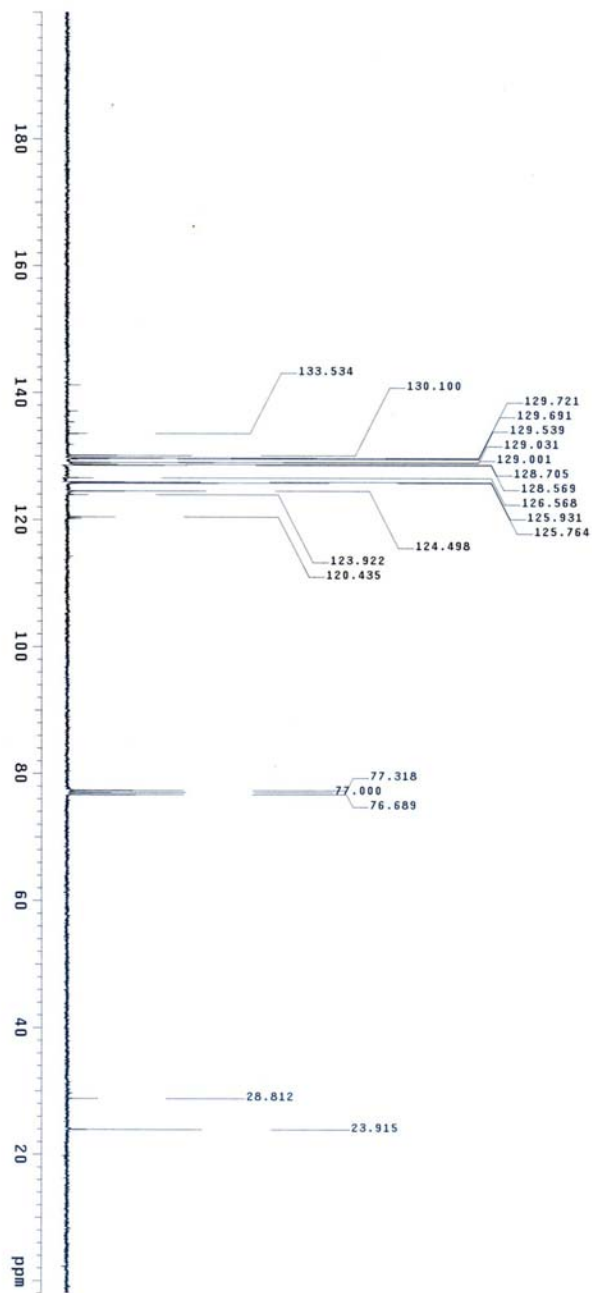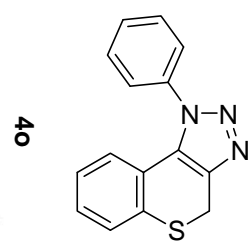

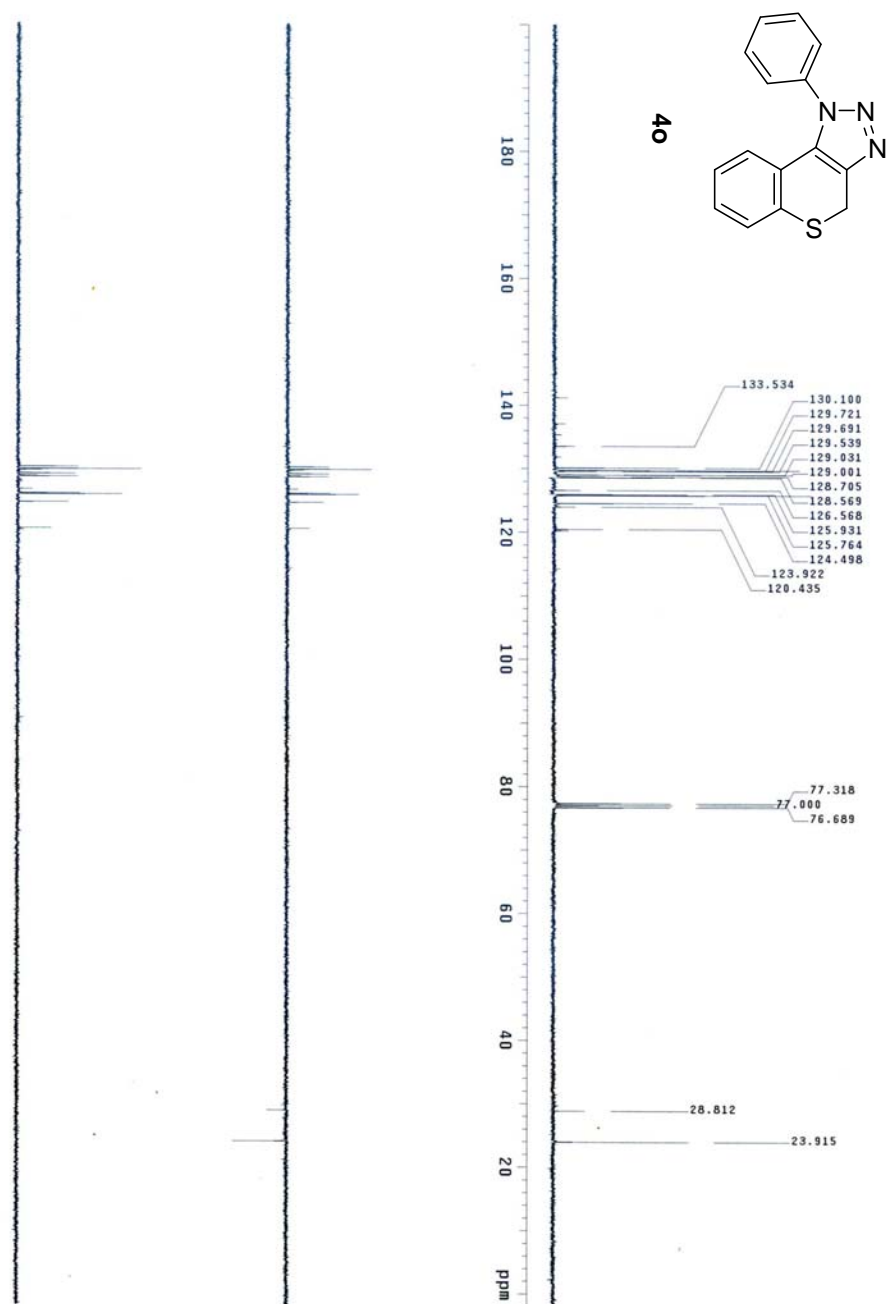

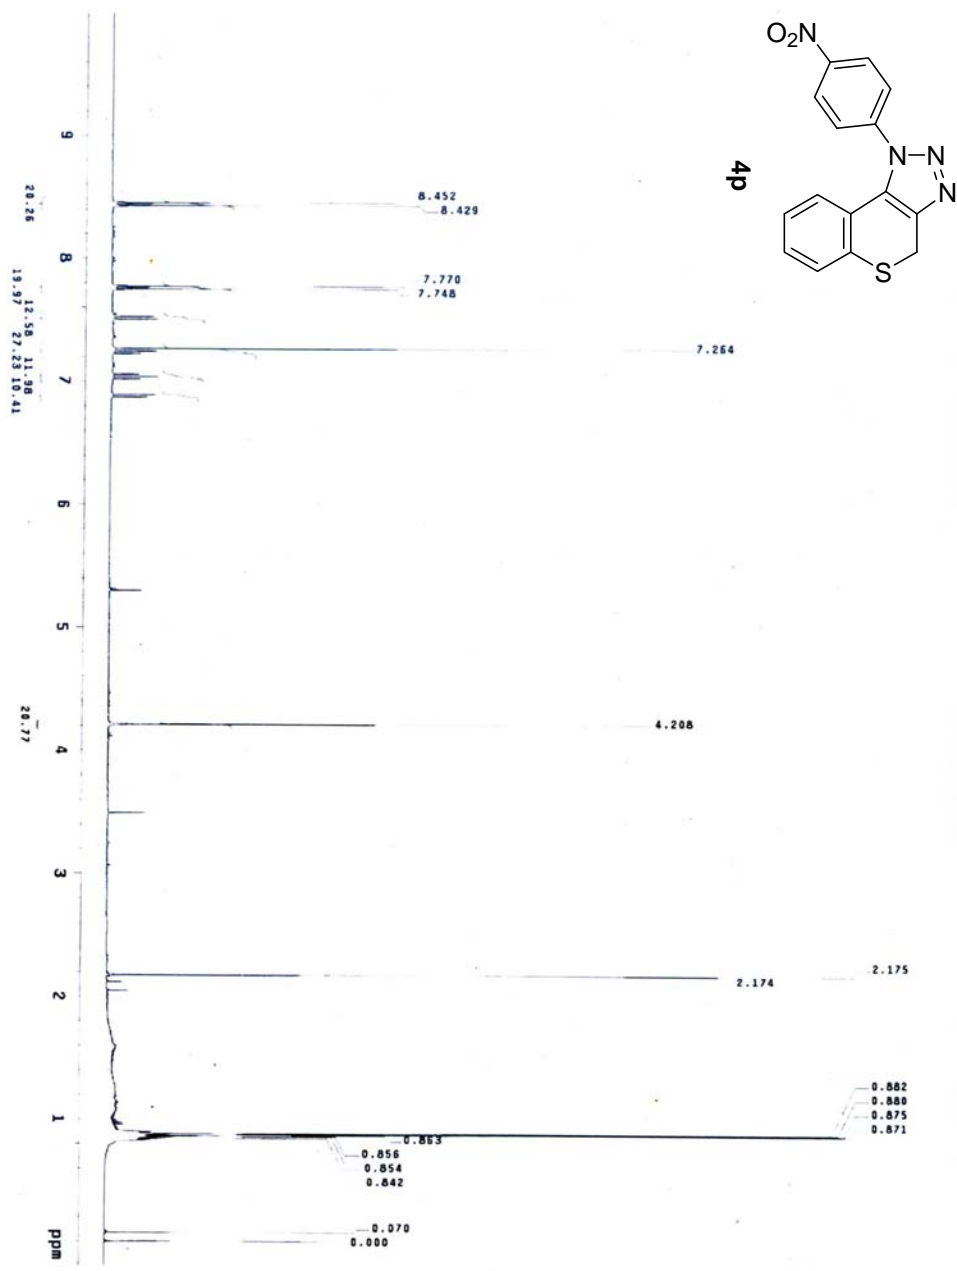

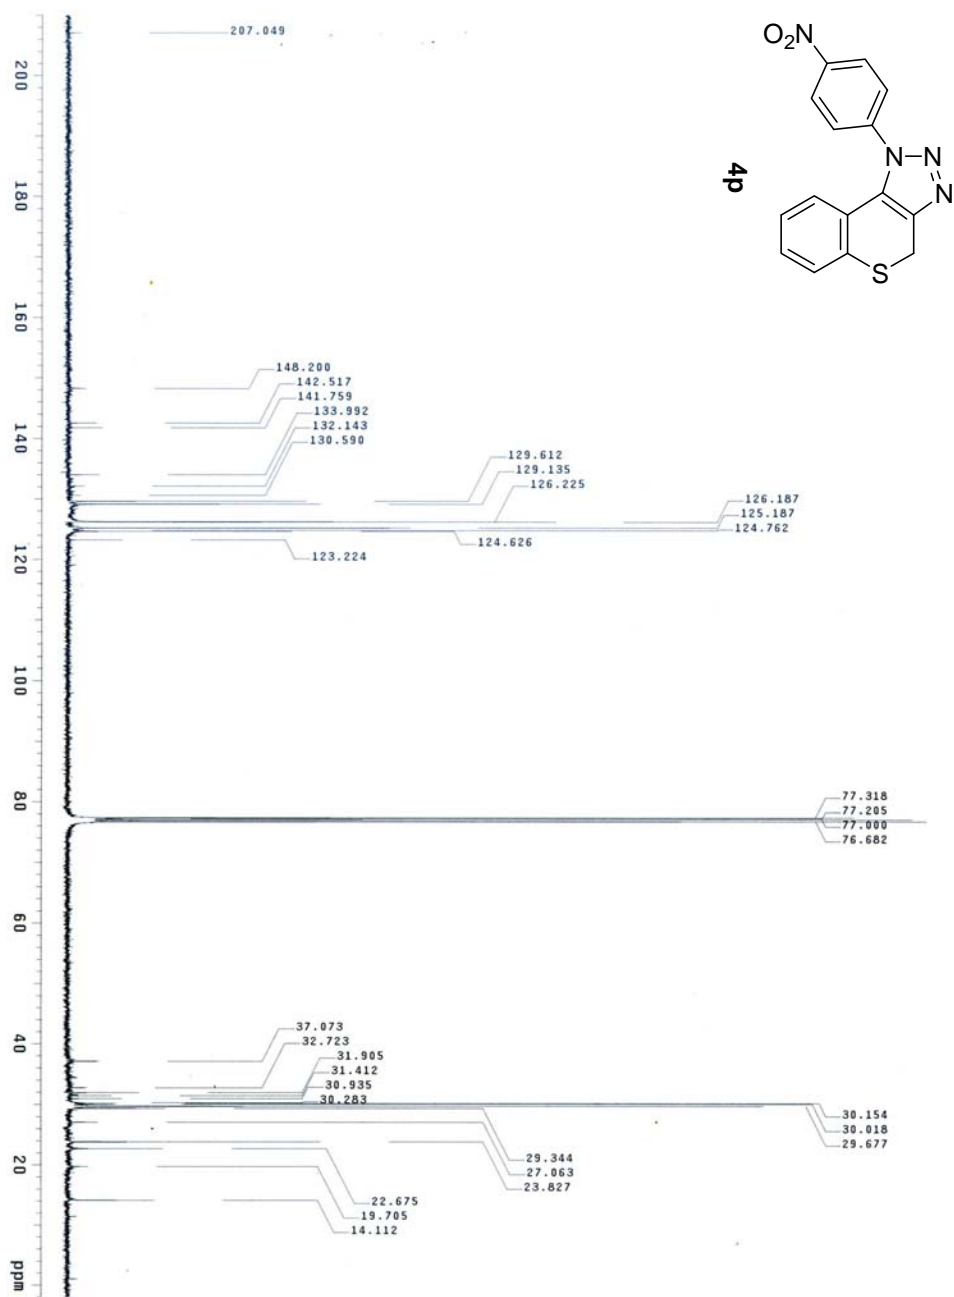

#### 4. ORTEP Diagram for 2a · 4a and 4n

##### 1-(3,4,5-trimethoxyphenyl)-1H-[1,2,3]triazolo[4,5-c]quinoline (2a)

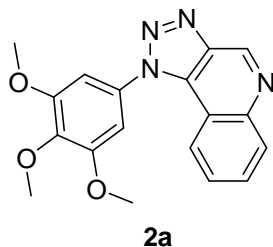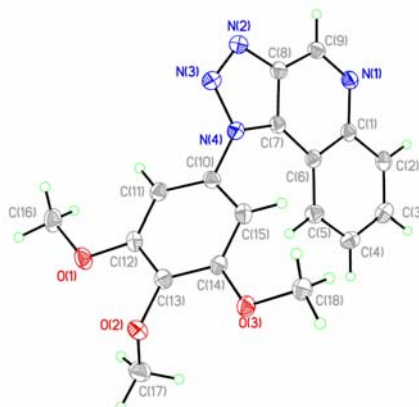

##### 1-(3,4,5-trimethoxyphenyl)-1,4-dihydrochromeno[4,3-d][1,2,3]triazole (4a)

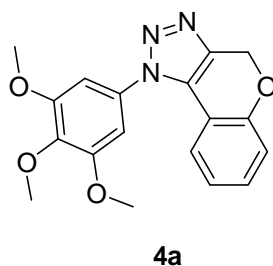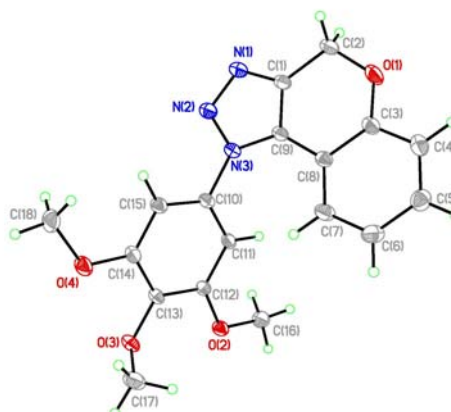

##### 1-phenyl-1,4-dihydrothiochromeno[4,3-d][1,2,3]triazole (4o)

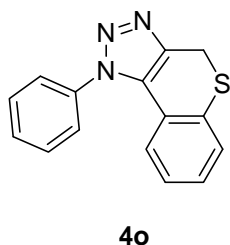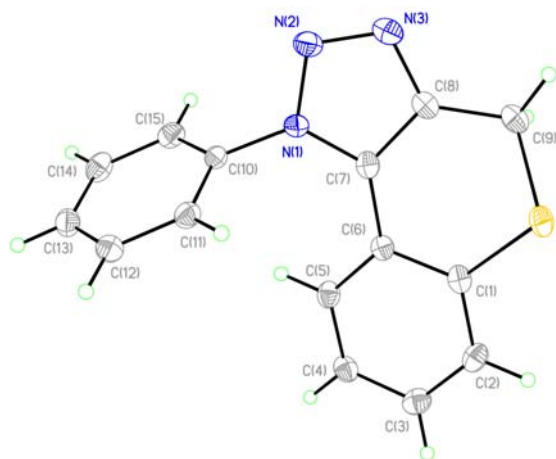



1- benzyl-1H-[1,2,3]triazolo[4,5-c]quinoline (2d)

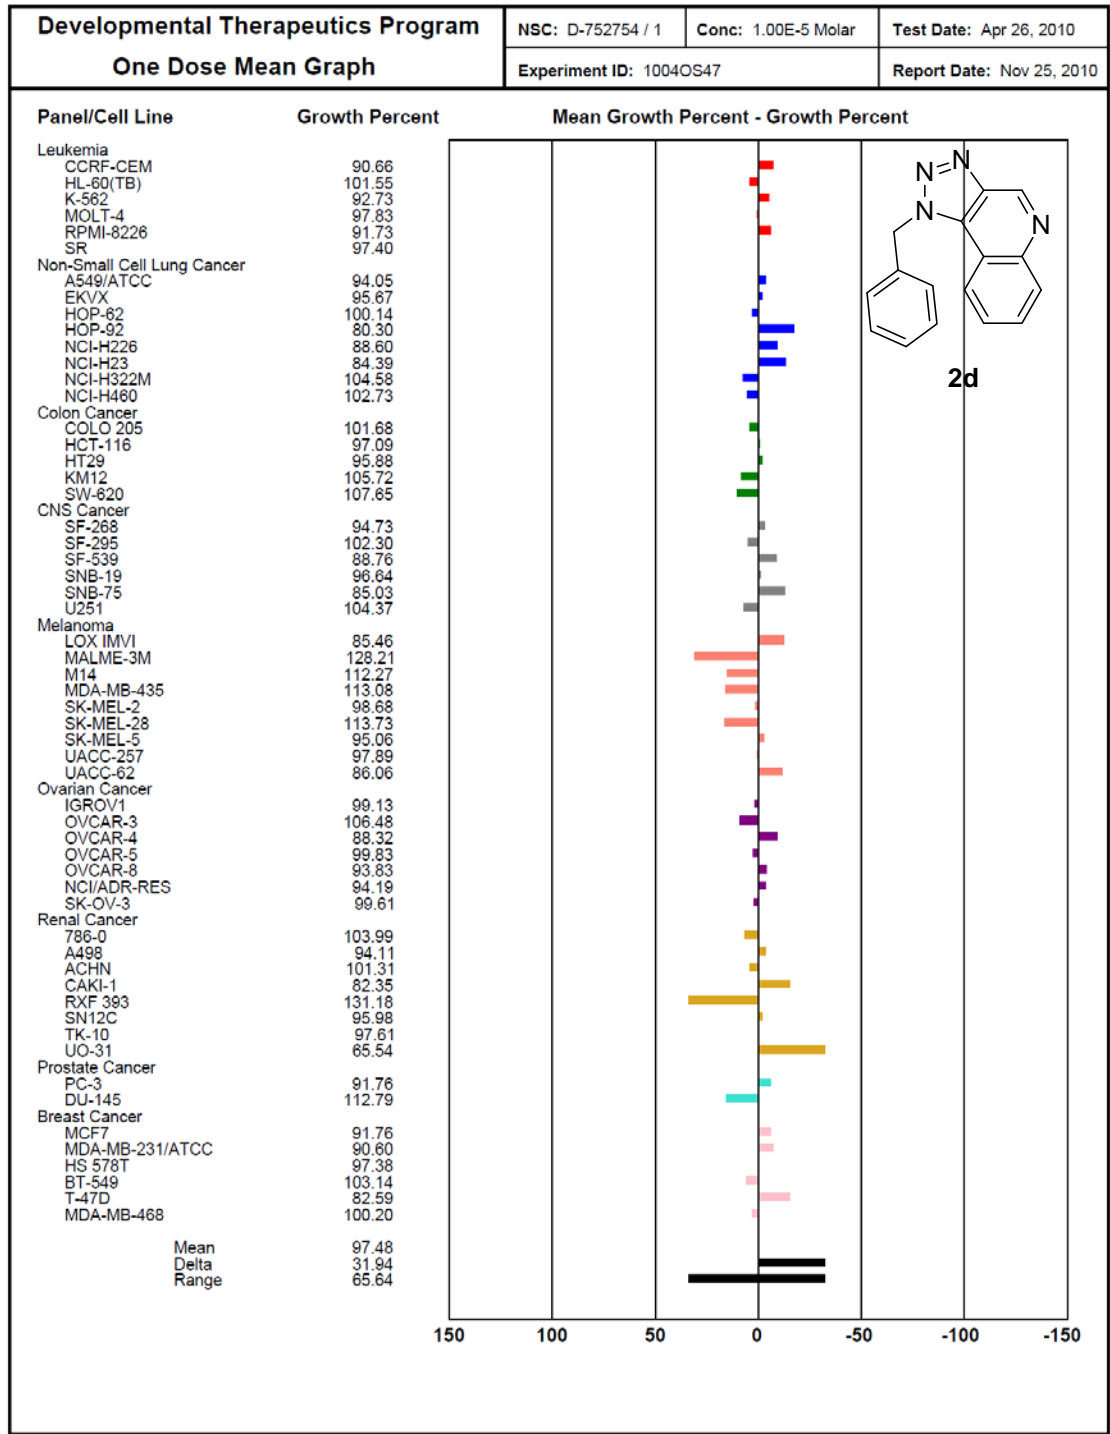

1-(4-bromophenyl)-1H-[1,2,3]triazolo[4,5-c]quinoline (2f)

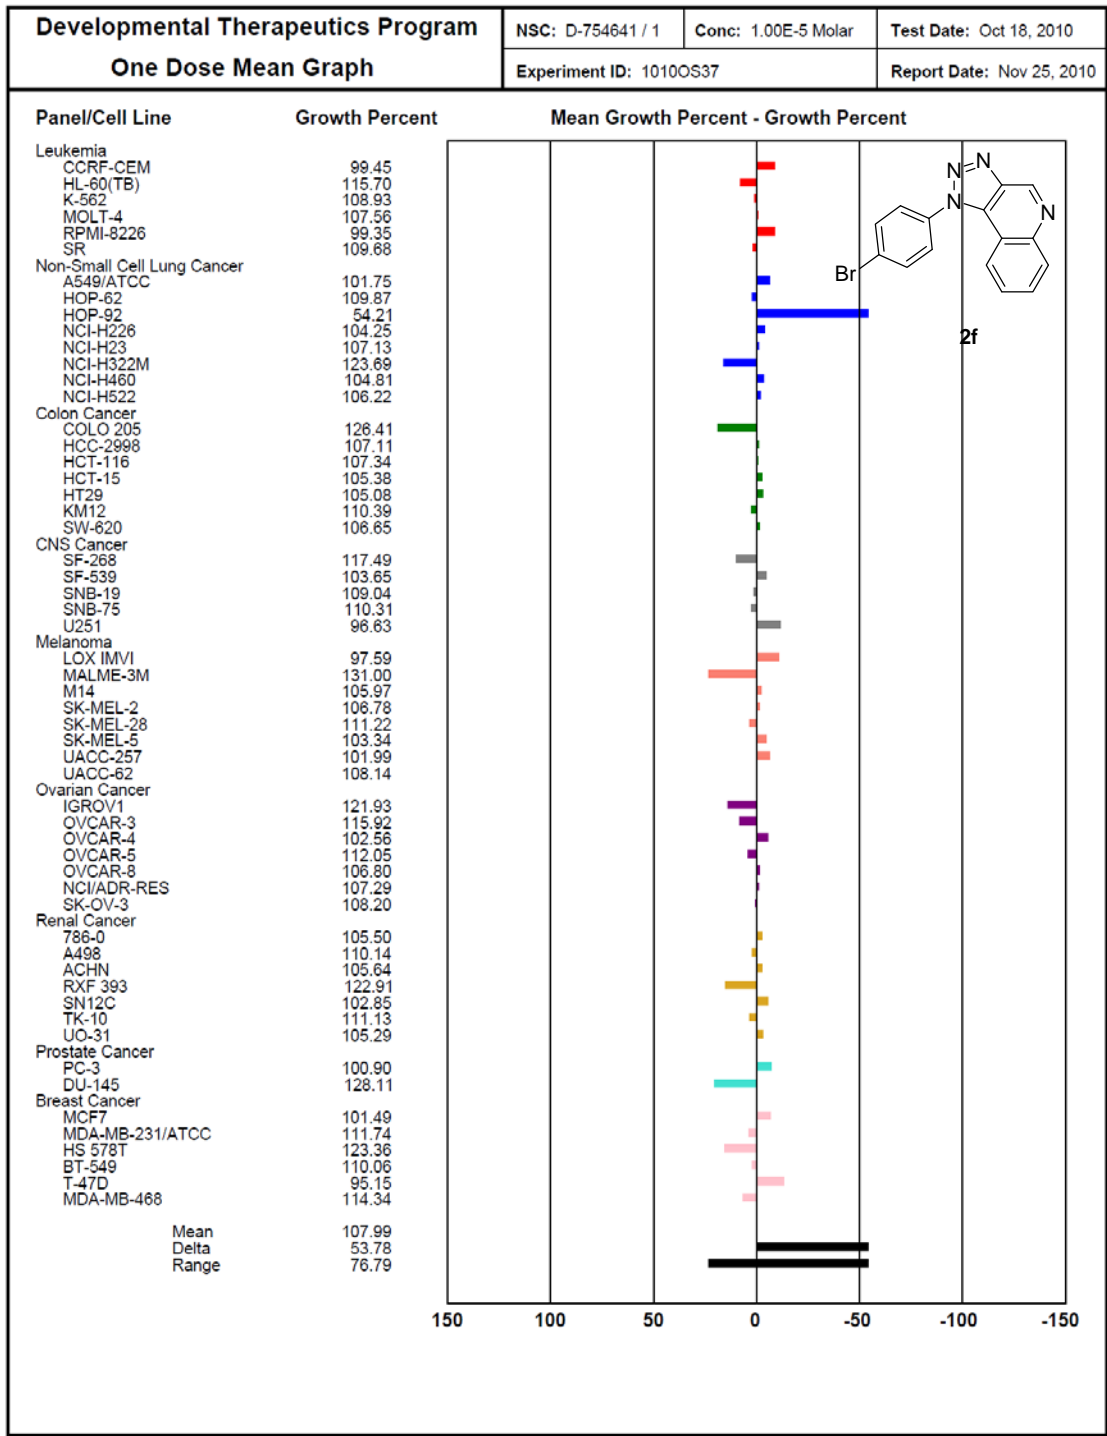

1-(3,4,5-trimethoxyphenyl)-1,4-dihydrochromeno[4,3-d][1,2,3]triazole(4a)

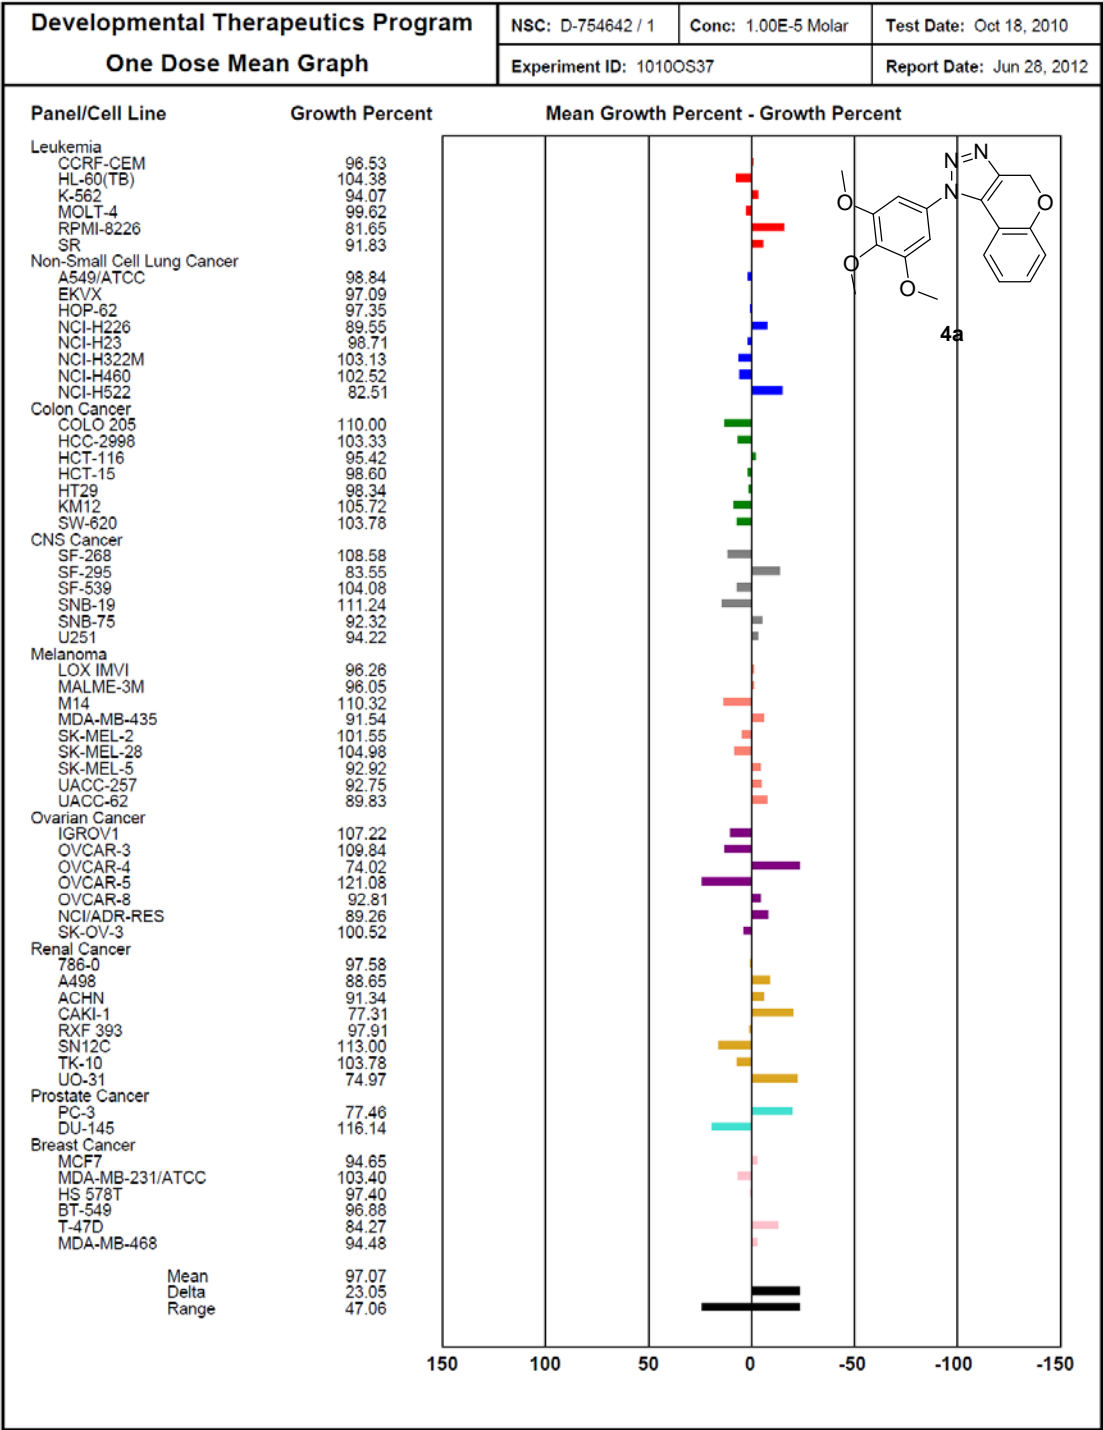

**1- benzyl-1,4-dihydrochromeno[4,3-d][1,2,3]triazole(4c)**

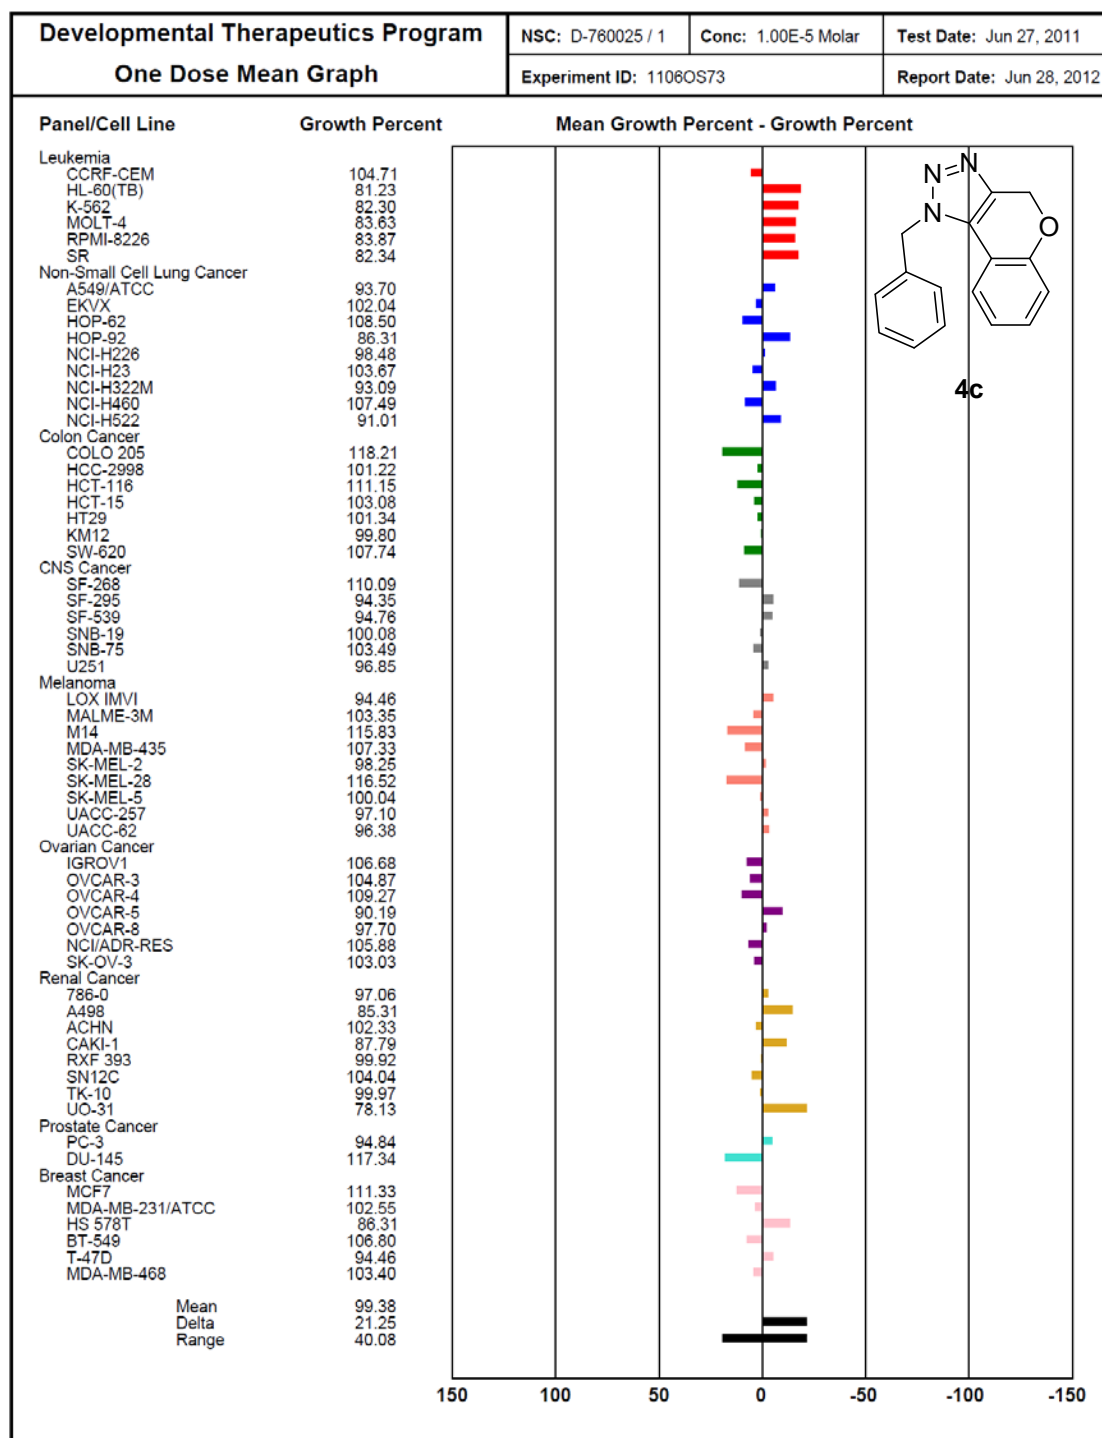

1-(4-bromophenyl)-1,4-dihydrochromeno[4,3-d][1,2,3] triazole(4i)

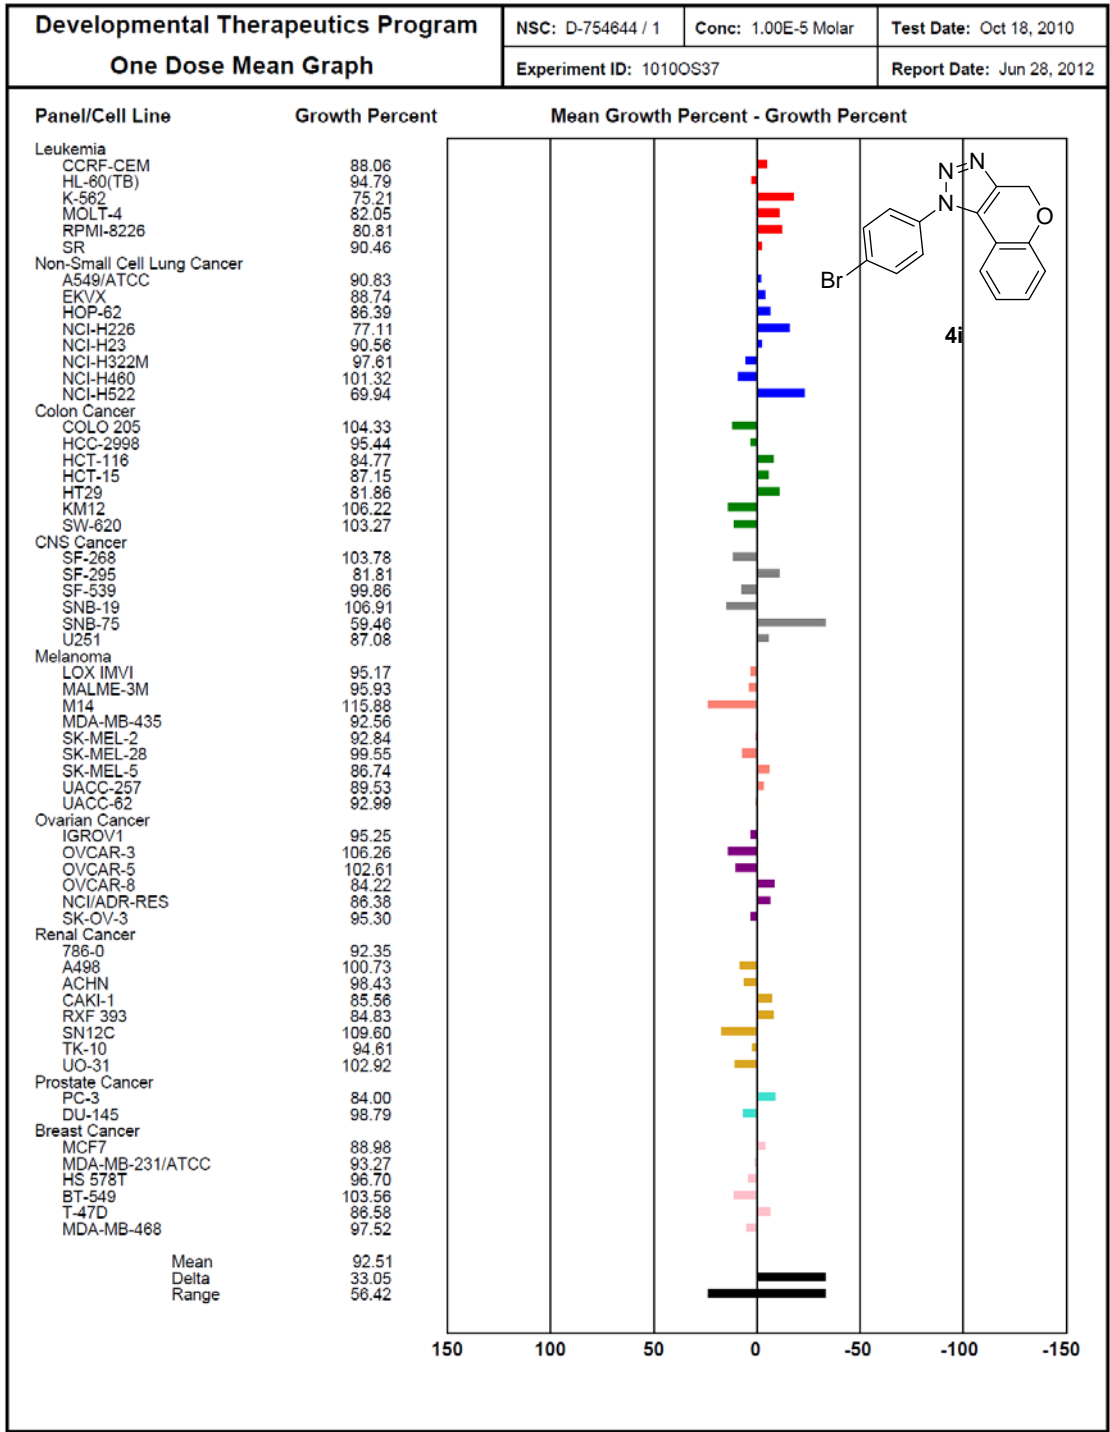

1-(3,4,5-trimethoxyphenyl)-1,4-dihydrothiochromeno [4,3-d][1,2,3]triazole(4m)

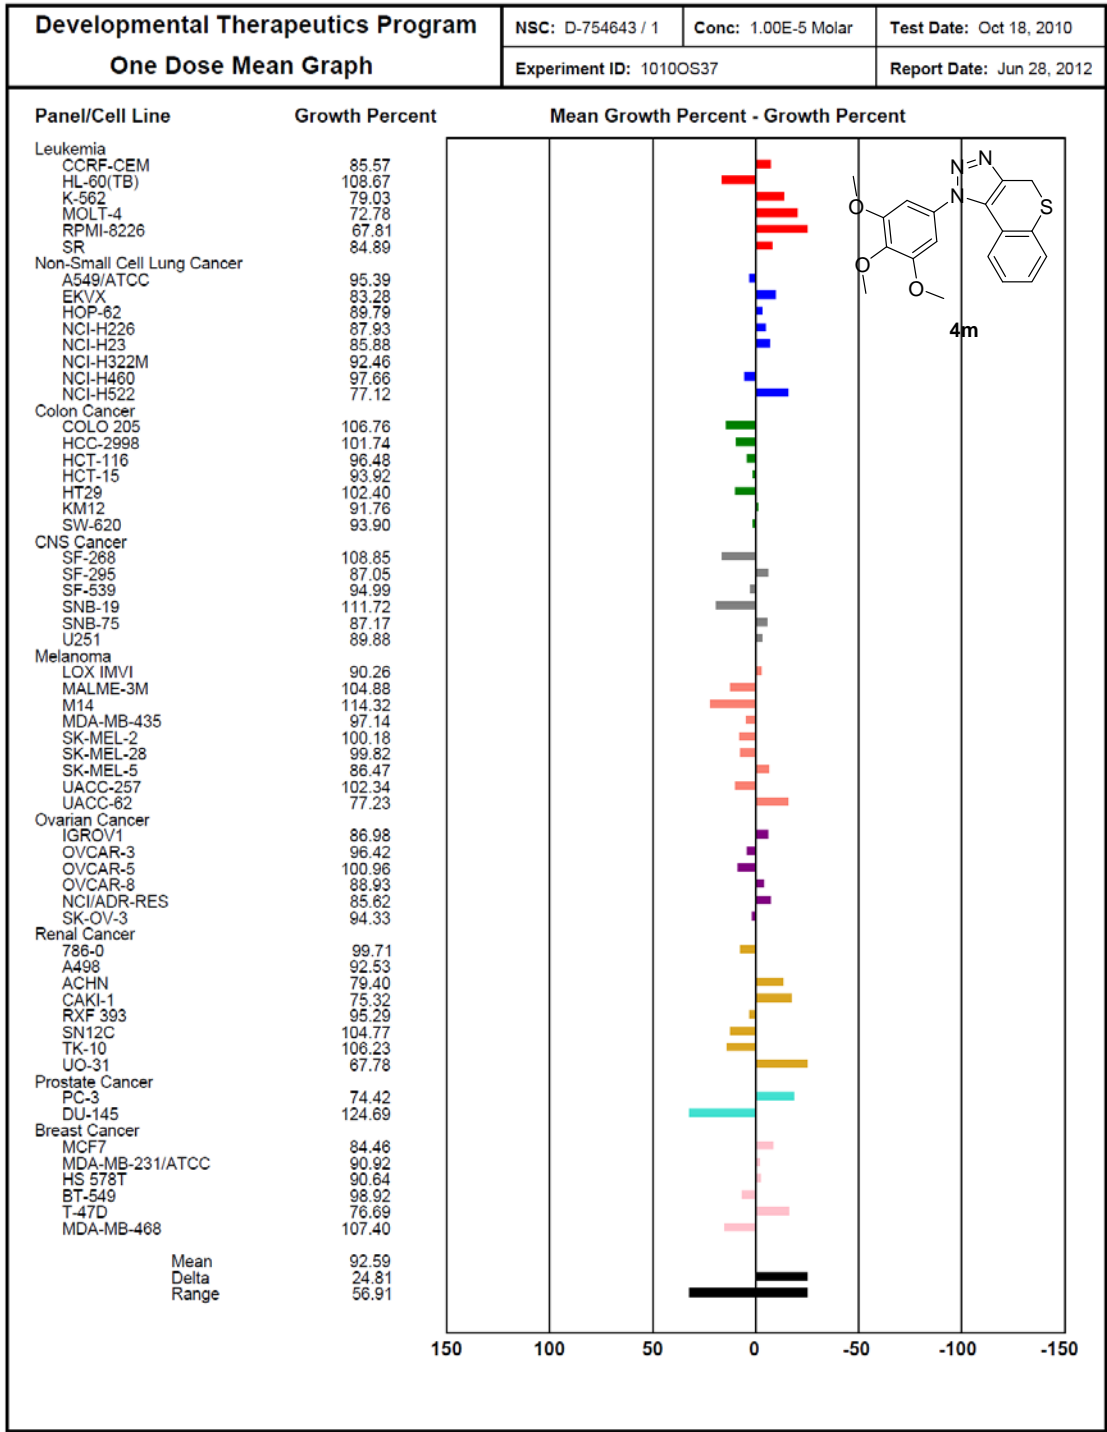

1-benzyl-1,4-dihydrothiochromeno[4,3-d][1,2,3]triazole(4n)

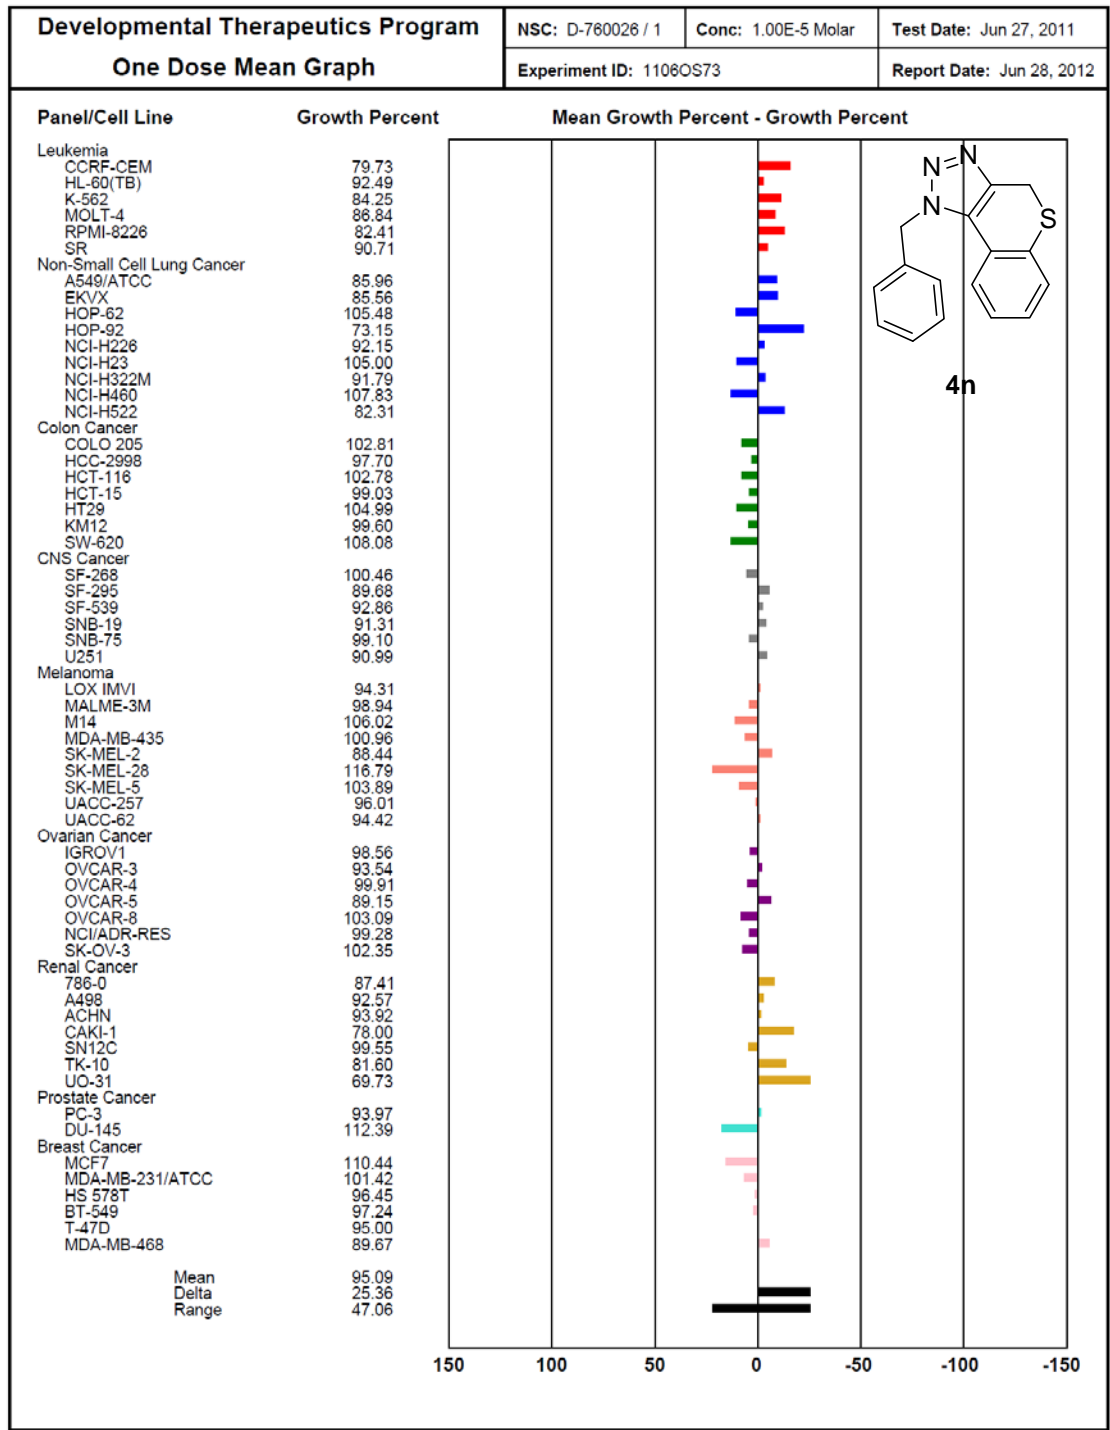

6. CCDC No of **2a** 、 **4a** and **4o**.

(a) CCDC No of **2a**: CCDC 890286

(b) CCDC No of **4a**: CCDC 890287

(a) CCDC No of **4o**: CCDC 890285
